# Supplementary material for: Pyranodipyran Derivatives with Tyrosyl DNA Phosphodiesterase 1 Inhibitory Activities and Fluorescent Properties from Aspergillus sp. EGF 15-0-3
Source: MDPI journal article supplement (doi:10.3390/md20030211), 2022-03-17
Supplement: s1 [file s1]

## Supporting Information

### **Pyranodipyran Derivatives with Tyrosyl DNA Phosphodiesterase 1 Inhibitory Activities and Fluorescent Properties from *Aspergil- lus* sp. EGF 15-0-3**

Xia Wei<sup>†, #</sup>, Fang-Ting Wang<sup>‡, #</sup>, Mei-Xia Si-Tu<sup>†</sup>, Hao Fan<sup>†</sup>, Jin-Shan Hu<sup>†</sup>, Hao Yang<sup>‡</sup>, Shan-Yue Guan<sup>§</sup>,  
Lin-Kun An<sup>\*, ‡</sup>, Cui-Xian Zhang<sup>\*, †</sup>

<sup>†</sup> School of Pharmaceutical Sciences, Guangzhou University of Chinese Medicine, Guangzhou 510006, People's Republic of China

<sup>‡</sup> School of Pharmaceutical Sciences, Sun Yat-Sen University, Guangzhou 510006, People's Republic of China

<sup>§</sup>Instrumental analysis & Research center, Sun Yat-Sen University, Guangzhou 510275, People's Republic of China

<sup>#</sup> They are equal to the manuscript.

|                                                                                                                 |       |
|-----------------------------------------------------------------------------------------------------------------|-------|
| Figure S1. UPLC-MS/MS analyses of the EtOAc extract of <i>Aspergillus sp.</i> EGF15-0-3 in different media..... | S4-S5 |
| Figure S2. $^{13}\text{C}$ NMR calculation results of four possible isomers of <b>2</b> .....                   | S5    |
| Figure S3. $^{13}\text{C}$ NMR calculation results of two possible isomers of <b>4</b> .....                    | S6    |
| Figure S4. $^{13}\text{C}$ NMR calculation results of two possible isomers of <b>5</b> .....                    | S7    |
| Figure S5. $^{13}\text{C}$ NMR calculation results of four possible isomers of <b>6</b> .....                   | S8    |

## ***Experimental Section***

|                                                                        |         |
|------------------------------------------------------------------------|---------|
| 1. General Experimental Procedures.....                                | S9      |
| 2. Chiral separations of <b>1–6</b> .....                              | S9-S11  |
| 3. X-ray crystallographic analysis of (–)- <b>1</b> .....              | S11     |
| 4. Quantum chemical $^{13}\text{C}$ NMR calculations of <b>1</b> ..... | S12-S15 |
| 5. Quantum chemical ECD calculations of <b>1–6</b> .....               | S15-S29 |
| 6. TDP1 inhibition assay.....                                          | S29-S30 |
| 7. Molecular Modelling.....                                            | S30     |

## ***Spectral Information***

|                                                                            |         |
|----------------------------------------------------------------------------|---------|
| Figure S18. UV spectrum of <b>1</b> in MeOH.....                           | S31     |
| Figure S19. IR spectrum of <b>1</b> (KBr disc) .....                       | S31     |
| Figure S20. HRESIMS spectrum of <b>1</b> .....                             | S31     |
| Figure S21-S27. 1D and 2D NMR spectra of <b>1</b> in $\text{CDCl}_3$ ..... | S32-S35 |
| Figure S28. UV spectrum of <b>3</b> in MeOH.....                           | S35     |
| Figure S29. IR spectrum of <b>3</b> (KBr disc) .....                       | S36     |
| Figure S30. HRESIMS spectrum of <b>3</b> .....                             | S36     |
| Figure S31-S37. 1D and 2D NMR spectra of <b>3</b> in $\text{CDCl}_3$ ..... | S36-S39 |
| Figure S38. UV spectrum of <b>4</b> in MeOH.....                           | S40     |

|                                                                              |         |
|------------------------------------------------------------------------------|---------|
| Figure S39. IR spectrum of <b>4</b> (KBr disc) .....                         | S40     |
| Figure S40. HRESIMS spectrum of <b>4</b> .....                               | S40     |
| Figure S41-S47. 1D and 2D NMR spectra of <b>4</b> in CDCl <sub>3</sub> ..... | S41-S44 |
| Figure S48. UV spectrum of <b>5</b> in MeOH.....                             | S44     |
| Figure S49. IR spectrum of <b>5</b> (KBr disc) .....                         | S45     |
| Figure S50. HRESIMS spectrum of <b>5</b> .....                               | S45     |
| Figure S51-S57. 1D and 2D NMR spectra of <b>5</b> in CDCl <sub>3</sub> ..... | S45-S48 |
| Figure S58. UV spectrum of <b>6</b> in MeOH.....                             | S49     |
| Figure S59. IR spectrum of <b>6</b> (KBr disc) .....                         | S49     |
| Figure S60. HRESIMS spectrum of <b>6</b> .....                               | S49     |
| Figure S61-S67. 1D and 2D NMR spectra of <b>6</b> in CD <sub>3</sub> OD..... | S50-S53 |

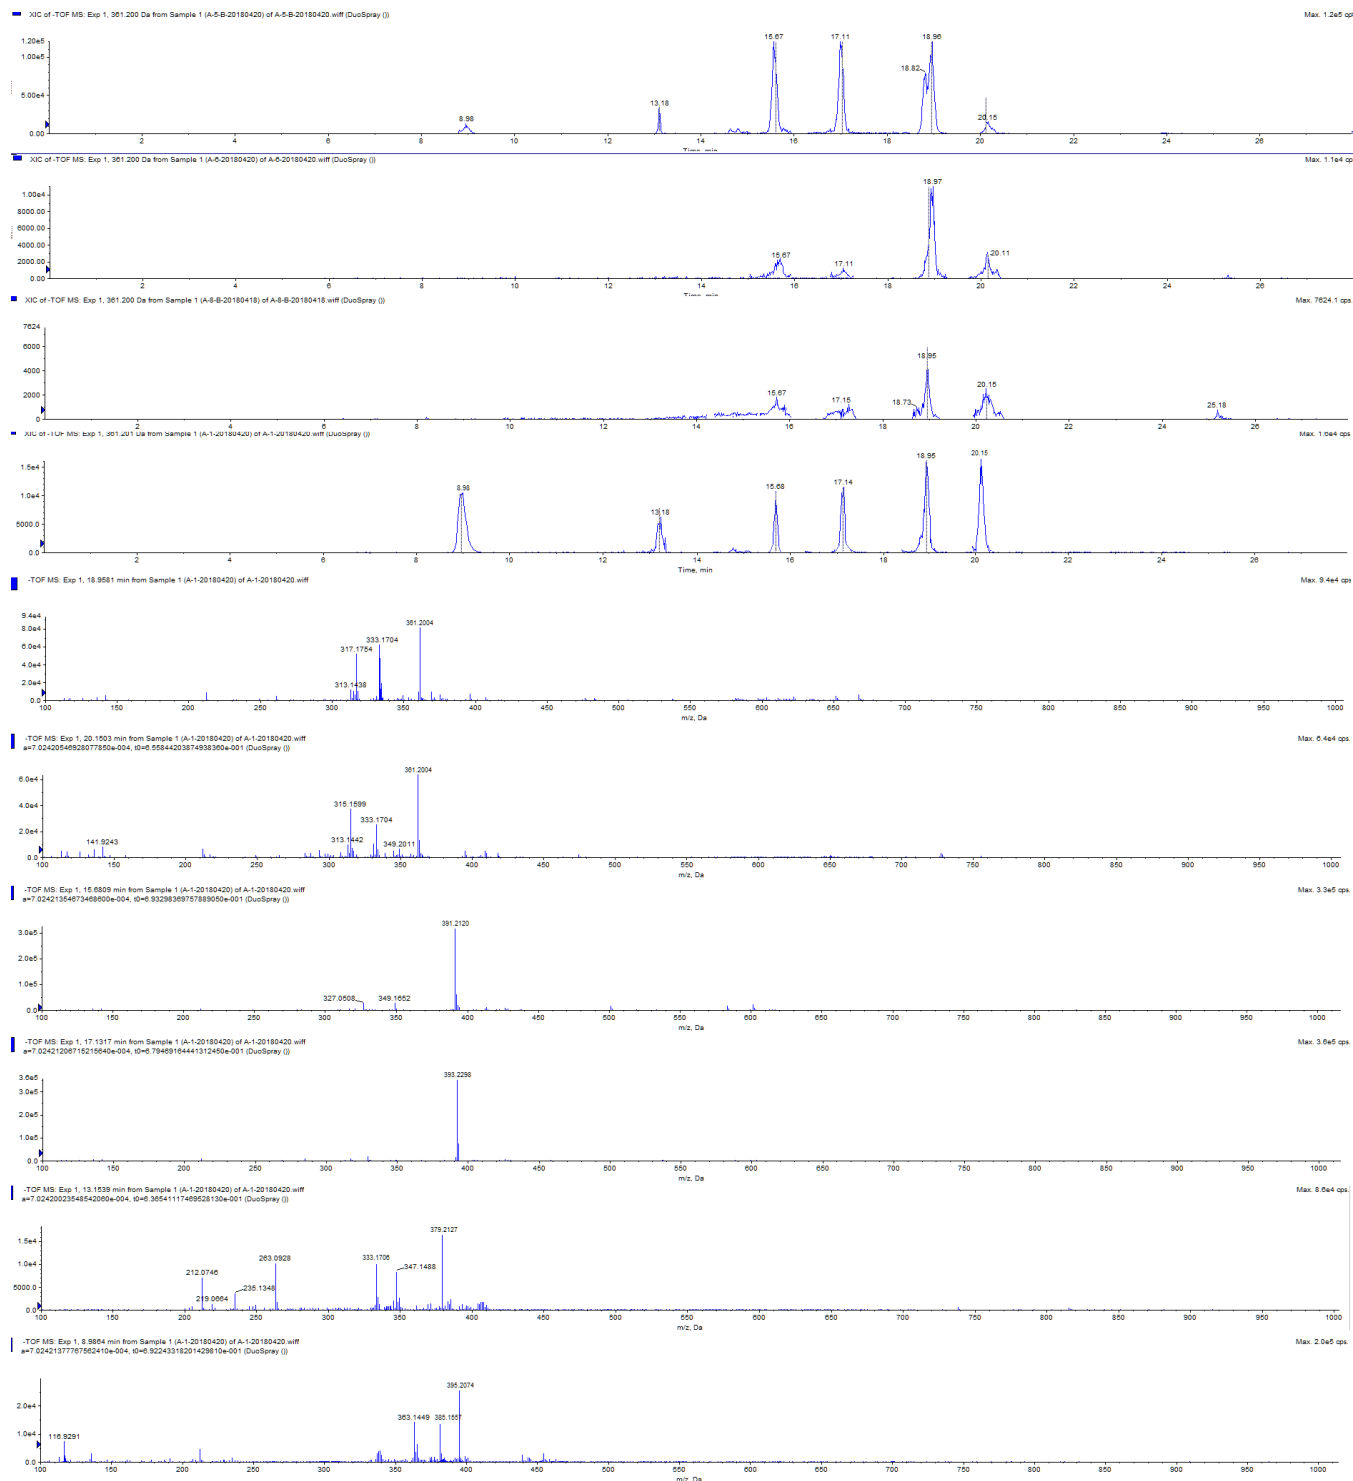

**Figure S1.** UPLC-MS/MS analyses of the EtOAc extract of *Aspergillus sp.* EGF15-0-3 in different media (A: Extracted ion chromatogram of the EtOAc extract in PDB medium; B: Extracted ion chromatogram of the EtOAc extract in Z-1 medium; C: Extracted ion chromatogram of the EtOAc extract in Z-3 medium, D: Extracted ion chromatogram of the EtOAc extract in rice medium, Peak I: retention time: 18.958 min,  $m/z$  361.2004  $[M-H]^-$ , Peak II: retention time: 20.153 min,  $m/z$  361.2004  $[M-H]^-$ , Peak III: retention time: 15.680 min,  $m/z$  391.2120  $[M-H]^-$ , Peak IV: retention time: 17.131 min,  $m/z$  393.2298  $[M-H]^-$ , Peak V:

retention time: 13.153 min,  $m/z$  379.2127  $[M-H]^-$ , Peak VI: retention time: 8.986 min,  $m/z$  395.2074  $[M-H]^-$ ).

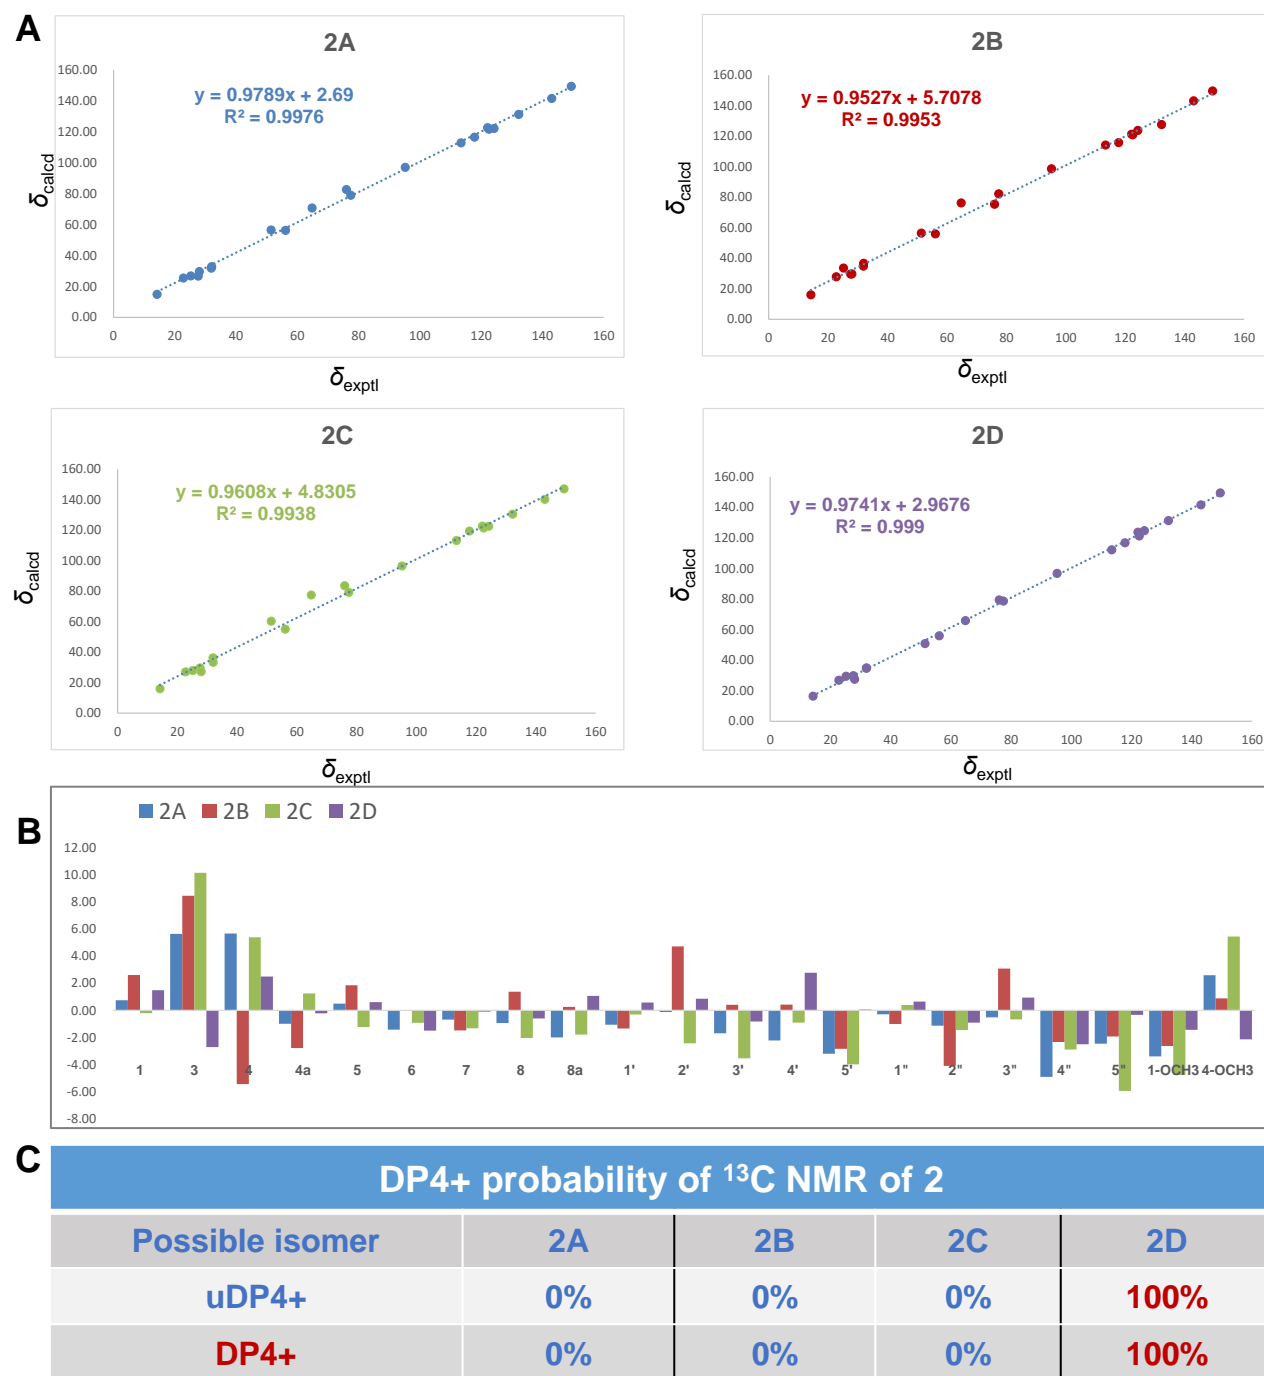

**Figure S2.**  $^{13}\text{C}$  NMR calculation results of four possible isomers of **2**. (A) Linear correlation plots of predicted versus experimental  $^{13}\text{C}$  NMR chemical shifts. (B) Relative errors and standard deviations between the predicted  $^{13}\text{C}$  NMR chemical shifts of four potential structures and recorded  $^{13}\text{C}$  NMR data. (C) The DP4+ probability of  $^{13}\text{C}$  NMR chemical shifts.  $1R^*,3R^*,4R^*-2$  (2A), isomer 2 is  $1R^*,3S^*,4S^*-2$  (2B), isomer 3 is  $1S^*,3S^*,4R^*-2$  (2C), and isomer 4 is  $1R^*,3S^*,4R^*-2$  (2D).

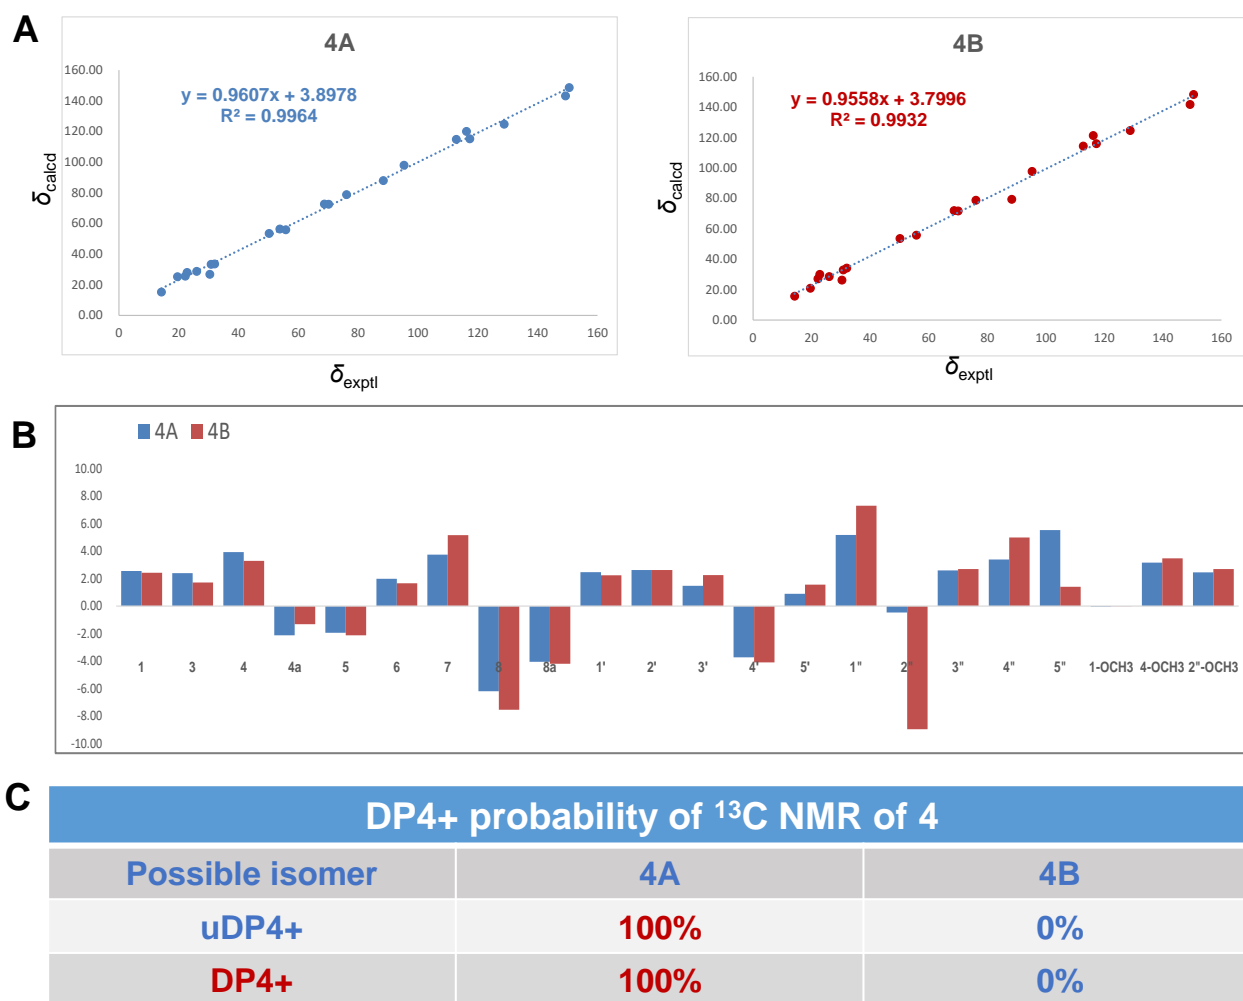

**Figure S3.**  $^{13}\text{C}$  NMR calculation results of two possible isomers of **4** (A) Linear correlation plots of predicted versus experimental  $^{13}\text{C}$  NMR chemical shifts. (B) Relative errors and standard derivations between the predicted  $^{13}\text{C}$  NMR chemical shifts of four potential structures and recorded  $^{13}\text{C}$  NMR data. (C) The DP4+ probability of  $^{13}\text{C}$  NMR chemical shifts.  $1R^*,3S^*,4S^*,2''R^*$ -**4** (**4A**), and  $1R^*,3S^*,4S^*,2''S^*$ -**4** (**4B**).

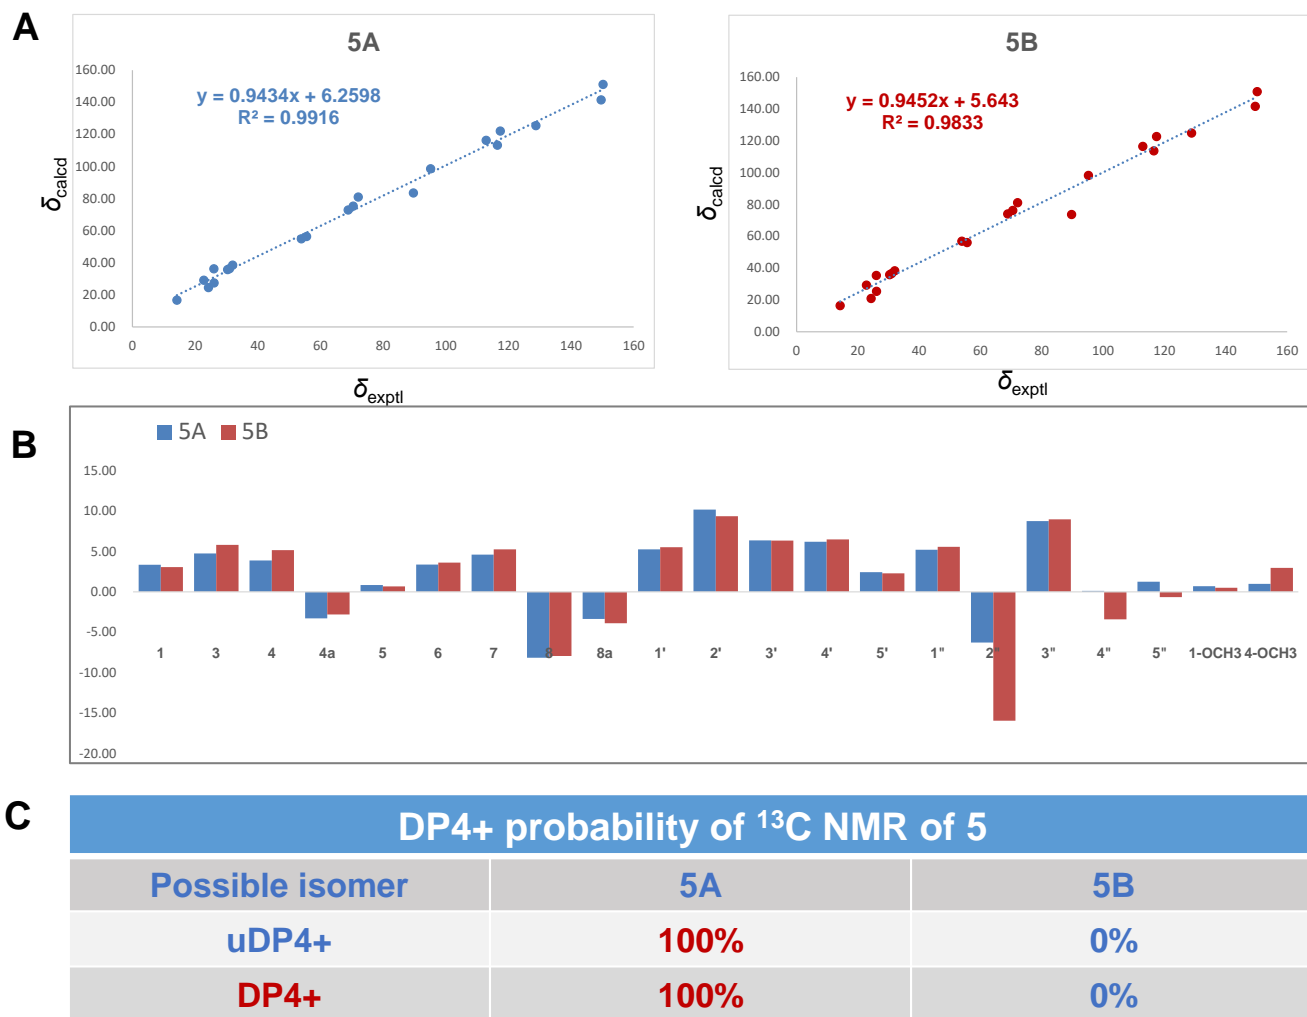

**Figure S4.**  $^{13}\text{C}$  NMR calculation results of two possible isomers of **5** (A) Linear correlation plots of predicted versus experimental  $^{13}\text{C}$  NMR chemical shifts. (B) Relative errors and standard derivations between the predicted  $^{13}\text{C}$  NMR chemical shifts of four potential structures and recorded  $^{13}\text{C}$  NMR data. (C) The DP4+ probability of  $^{13}\text{C}$  NMR chemical shifts.  $1R^*,3S^*,4S^*,2''R^*$ -**5** (**5A**), and  $1R^*,3S^*,4S^*,2''S^*$ -**5** (**5B**).

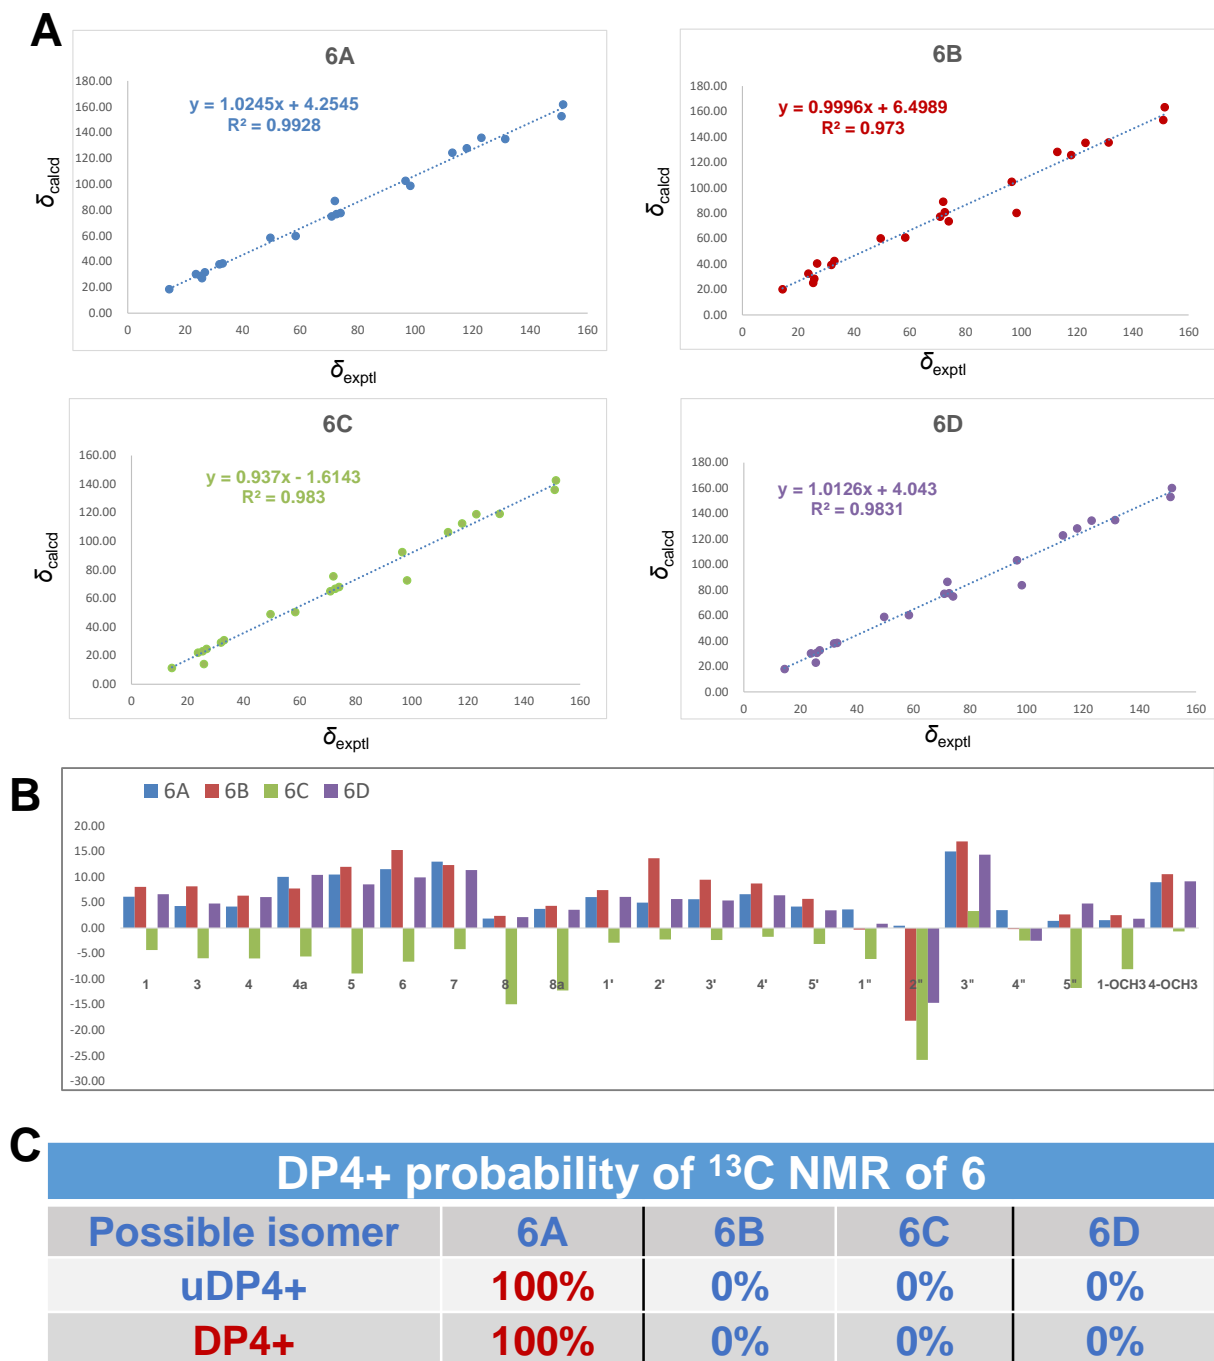

**Figure S5.**  $^{13}\text{C}$  NMR calculation results of four possible isomers of **6**. (A) Linear correlation plots of predicted versus experimental  $^{13}\text{C}$  NMR chemical shifts. (B) Relative errors and standard derivations between the predicted  $^{13}\text{C}$  NMR chemical shifts of four potential structures and recorded  $^{13}\text{C}$  NMR data. (C) The DP4+ probability of  $^{13}\text{C}$  NMR chemical shifts.  $1R^*,3S^*,4S^*,1''R^*,2''R^*$ -**6** (**6A**),  $1R^*,3S^*,4S^*,1''S^*,2''S^*$ -**6** (**6B**),  $1R^*,3S^*,4S^*,1''R^*,2''S^*$ -**6** (**6C**), and  $1R^*,3S^*,4S^*,1''S^*,2''R^*$ -**6** (**6D**).



## Experimental Section

### 1. General Experimental Procedures.

Optical rotations were performed on a MCP 200 digital polarimeter (Anton Paar). UV and ECD data were recorded with a Chirascan circular dichroism spectrometer (Applied Photophysics). Fluorescence spectra were recorded with Edinburgh instruments FLS1000. IR spectra were acquired with a Nicolet6700-Continuum Fourier transform infrared spectrometer and microscope spectrometer (Thermo Scientific). NMR spectra were recorded on a Bruker AVANCE III HD 400 MHz DIGITAL NMR spectrometer (Bruker Optics) with tetramethylsilane as the internal standard. HR-ESI-MS were obtained on a Triple TOFTM 5600+ systems (AB SCIEX). The crystallographic data were recorded on a Rigaku Oxford Diffraction Supernova diffractometer with Cu K $\alpha$  radiation. HPLC was operated by using HPLC (quiksep, H & E). Column chromatography (CC) was performed on 200-300 mesh silica gel (Qingdao Marine Chemical Factory, China) and Sephadex LH-20 (Amersham Pharmacia). Fractions were monitored by TLC with silica gel GF<sub>254</sub> on glass plates (Qingdao Marine Chemical Factory, China), and spots were visualized under ultraviolet transmission reflectometer (Shanghai Jingke Industrial).

### 3. Chiral Separation of **1**—**6**

Except for **5**, the mobile phases of all the remaining compounds were isopropanol–*n*-hexane (10:90, v/v) and the flow rate was 3.0 mL/min. And followed by obtained (+)-**1** (4.0 mg,  $t_R$  = 9.102 min) and (–)-**1** (4.0 mg,  $t_R$  = 13.768 min) (Figure S6), (+)-**2** (2.0 mg,  $t_R$  = 6.863 min) and (–)-**2** (2.0 mg,  $t_R$  = 6.438 min) (Figure S7), (+)-**3** (1.0 mg,  $t_R$  = 15.155 min) and (–)-**3** (1.0 mg,  $t_R$  = 10.788 min) (Figure S8), (+)-**4** (0.8 mg,  $t_R$  = 11.363 min) and (–)-**4** (0.8 mg,  $t_R$  = 14.613 min) (Figure S9), (+)-**6** (1.0 mg,  $t_R$  = 7.782 min) and (–)-**6** (1.0 mg,  $t_R$  = 6.882 min) (Figure S11), respectively. While **5** was used with isopropanol–*n*-hexane (8:92, v/v) and to yield (+)-**5** (0.5 mg,  $t_R$  = 13.132 min) and (–)-**5** (0.5 mg,  $t_R$  = 14.948 min) (Figure S10).

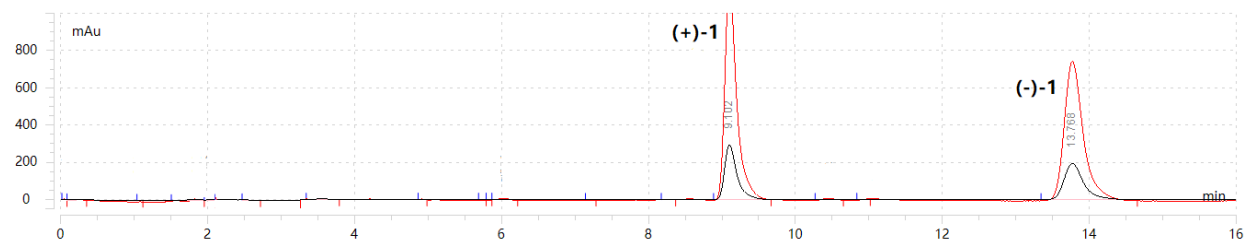

**Figures S6.** The chiral HPLC analysis of **1**.

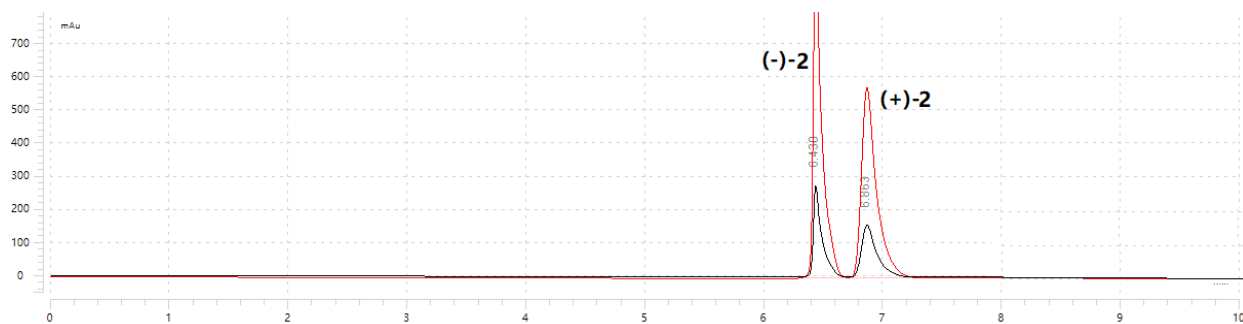

**Figures S7.** The chiral HPLC analysis of **2**.

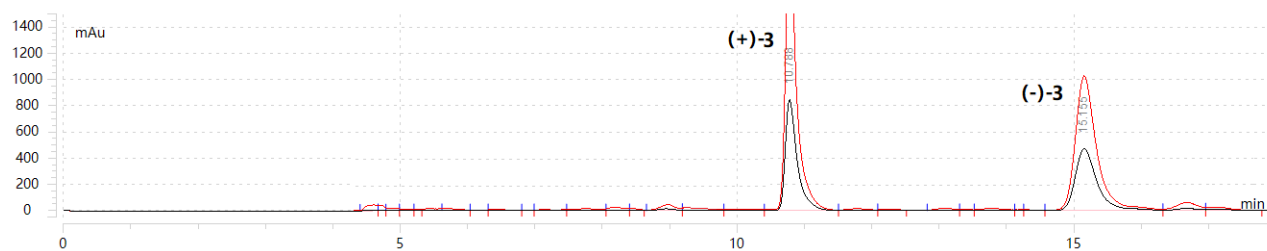

**Figures S8.** The chiral HPLC analysis of **3**.

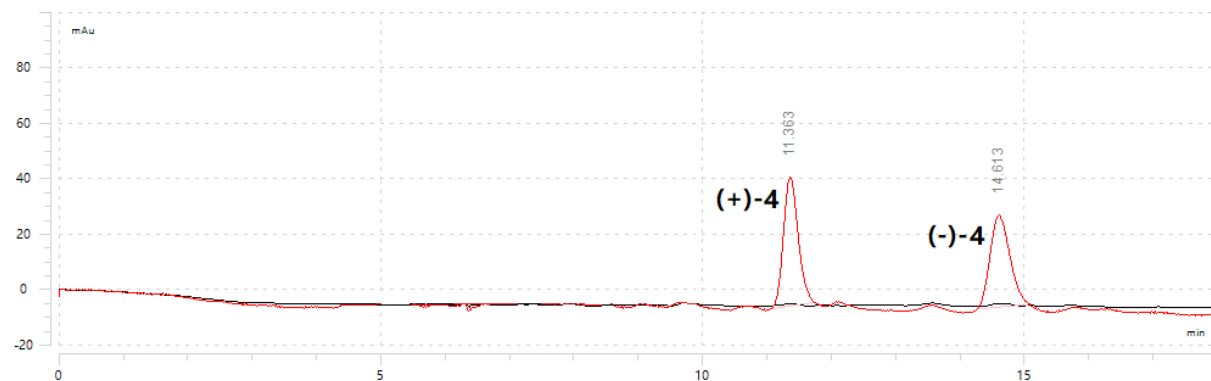

**Figures S9.** The chiral HPLC analysis of **4**.

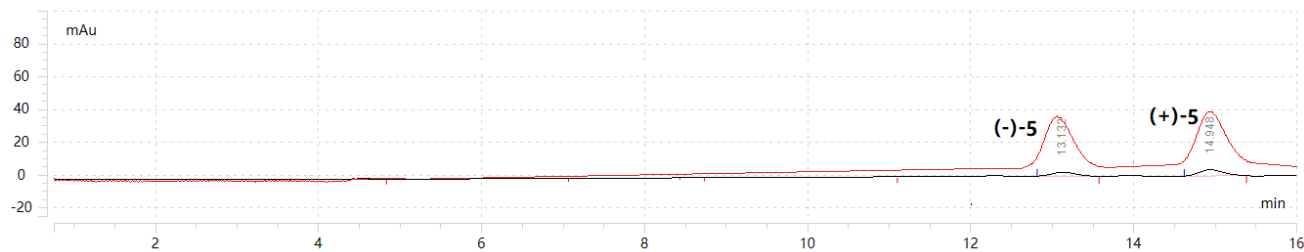

**Figures S10.** The chiral HPLC analysis of **5**.

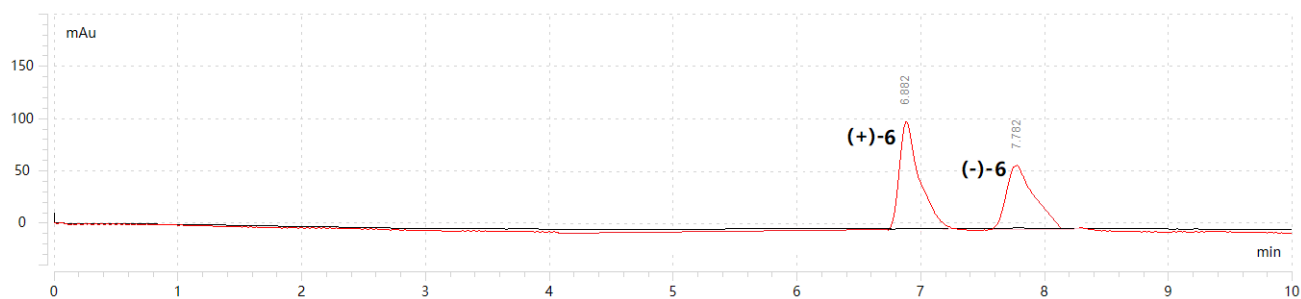

**Figures S11.** The chiral HPLC analysis of **6**.

### 3. X-ray crystallographic analysis of (-)-1

**Table S1.** Crystal data and structure refinement for (-)-1

|                                             |                                                                |
|---------------------------------------------|----------------------------------------------------------------|
| Identification code                         | (-)-1                                                          |
| Empirical formula                           | C <sub>21</sub> H <sub>30</sub> O <sub>5</sub>                 |
| Formula weight                              | 362.45                                                         |
| Temperature/K                               | 100.00(10)                                                     |
| Crystal system                              | orthorhombic                                                   |
| Space group                                 | P2 <sub>1</sub> 2 <sub>1</sub> 2 <sub>1</sub>                  |
| a/Å                                         | 6.0081(2)                                                      |
| b/Å                                         | 15.4529(5)                                                     |
| c/Å                                         | 21.4935(8)                                                     |
| $\alpha$ /°                                 | 90                                                             |
| $\beta$ /°                                  | 90                                                             |
| $\gamma$ /°                                 | 90                                                             |
| Volume/Å <sup>3</sup>                       | 1995.51(12)                                                    |
| Z                                           | 4                                                              |
| $\rho_{\text{calc}}$ /cm <sup>3</sup>       | 1.206                                                          |
| $\mu$ /mm <sup>-1</sup>                     | 0.687                                                          |
| F(000)                                      | 784.0                                                          |
| Crystal size/mm <sup>3</sup>                | 0.12 × 0.1 × 0.09                                              |
| Radiation                                   | CuK $\alpha$ ( $\lambda$ = 1.54184)                            |
| 2 $\theta$ range for data collection/°      | 7.046 to 147.142                                               |
| Index ranges                                | -5 ≤ h ≤ 7, -18 ≤ k ≤ 18, -26 ≤ l ≤ 25                         |
| Reflections collected                       | 12660                                                          |
| Independent reflections                     | 3927 [ $R_{\text{int}}$ = 0.0485, $R_{\text{sigma}}$ = 0.0547] |
| Data/restraints/parameters                  | 3927/0/241                                                     |
| Goodness-of-fit on F <sup>2</sup>           | 1.044                                                          |
| Final R indexes [ $I \geq 2\sigma(I)$ ]     | $R_1$ = 0.0448, $wR_2$ = 0.0986                                |
| Final R indexes [all data]                  | $R_1$ = 0.0549, $wR_2$ = 0.1047                                |
| Largest diff. peak/hole / e Å <sup>-3</sup> | 0.19/-0.23                                                     |
| Flack parameter                             | 0.11(16)                                                       |

#### 4. Quantum chemical $^{13}\text{C}$ NMR calculations of 1

**Table S2.** Experimental chemical shifts and calculated unscaled shifts for PD4+ probability analysis for **1**<sup>a</sup>.

| Nuclie | Sp2? | Experi-<br>mental | mPW1PW91/6-311G(d,p), PCM |          |          |          |
|--------|------|-------------------|---------------------------|----------|----------|----------|
|        |      |                   | Isomer 1                  | Isomer 2 | Isomer 3 | Isomer 4 |
| C      |      | 95.4              | 97.07                     | 98.61    | 96.45    | 96.75    |
| C      |      | 70.2              | 70.84                     | 76.28    | 77.43    | 65.86    |
| C      |      | 68.8              | 82.73                     | 75.43    | 83.54    | 79.32    |
| C      | x    | 117.8             | 116.57                    | 115.77   | 119.32   | 116.76   |
| C      | x    | 149.1             | 149.40                    | 149.71   | 147.01   | 149.35   |
| C      | x    | 113.3             | 112.90                    | 114.18   | 113.08   | 112.13   |
| C      | x    | 122.5             | 121.73                    | 120.92   | 121.34   | 121.23   |
| C      | x    | 143.4             | 141.59                    | 143.14   | 140.14   | 141.61   |
| C      | x    | 124.1             | 122.19                    | 123.77   | 122.52   | 124.63   |
| C      |      | 30.4              | 31.89                     | 34.84    | 36.20    | 34.69    |
| C      |      | 25.9              | 26.93                     | 33.67    | 27.79    | 29.48    |
| C      |      | 32.0              | 32.87                     | 36.71    | 33.21    | 34.90    |
| C      |      | 22.8              | 25.55                     | 27.89    | 26.97    | 26.84    |
| C      |      | 14.2              | 14.96                     | 16.11    | 15.85    | 16.34    |
| C      | x    | 122.2             | 122.60                    | 121.29   | 122.60   | 123.66   |
| C      | x    | 132.4             | 131.17                    | 127.68   | 130.45   | 131.33   |
| C      |      | 77.4              | 78.96                     | 82.26    | 79.10    | 78.61    |
| C      |      | 27.4              | 26.82                     | 29.58    | 29.64    | 29.85    |
| C      |      | 28.0              | 29.68                     | 29.71    | 27.11    | 27.39    |
| C      |      | 55.8              | 56.34                     | 56.06    | 54.95    | 55.88    |
| C      |      | 53.9              | 56.55                     | 56.48    | 60.21    | 50.75    |

<sup>a</sup> The chemical shifts were measured in chloroform-*d*, the unscaled shifts were calculated in chloroform. Isomer 1 is configuration 1*R*\*,3*R*\*,4*R*\*-**1**, isomer 2 is 1*R*\*,3*S*\*,4*S*\*-**1**, isomer 3 is 1*S*\*,3*S*\*,4*R*\*-**1**, and isomer 4 is 1*R*\*,3*S*\*,4*R*\*-**1**.

**Table S3.** Experimental chemical shifts and calculated unscaled shifts for PD4+ probability analysis for **2**<sup>a</sup>.

| Nuclie | Sp2? | Experi-<br>mental | mPW1PW91/6-311G(d,p), PCM |          |          |          |
|--------|------|-------------------|---------------------------|----------|----------|----------|
|        |      |                   | Isomer 1                  | Isomer 2 | Isomer 3 | Isomer 4 |
| C      |      | 95.2              | 97.07                     | 98.61    | 96.45    | 96.75    |
| C      |      | 64.8              | 70.84                     | 76.28    | 77.43    | 65.86    |
| C      |      | 76                | 82.73                     | 75.43    | 83.54    | 79.32    |
| C      | x    | 117.8             | 116.57                    | 115.77   | 119.32   | 116.76   |
| C      | x    | 149.4             | 149.40                    | 149.71   | 147.01   | 149.35   |
| C      | x    | 113.4             | 112.90                    | 114.18   | 113.08   | 112.13   |
| C      | x    | 122.5             | 121.73                    | 120.92   | 121.34   | 121.23   |
| C      | x    | 143.0             | 141.59                    | 143.14   | 140.14   | 141.61   |

|   |   |       |        |        |        |        |
|---|---|-------|--------|--------|--------|--------|
| C | x | 124.2 | 122.19 | 123.77 | 122.52 | 124.63 |
| C |   | 31.9  | 31.89  | 34.84  | 36.20  | 34.69  |
| C |   | 25.2  | 26.93  | 33.67  | 27.79  | 29.48  |
| C |   | 32.0  | 32.87  | 36.71  | 33.21  | 34.90  |
| C |   | 22.8  | 25.55  | 27.89  | 26.97  | 26.84  |
| C |   | 14.2  | 14.96  | 16.11  | 15.85  | 16.34  |
| C | x | 122.1 | 122.60 | 121.29 | 122.60 | 123.66 |
| C | x | 132.2 | 131.17 | 127.68 | 130.45 | 131.33 |
| C |   | 77.4  | 78.96  | 82.26  | 79.10  | 78.61  |
| C |   | 27.6  | 26.82  | 29.58  | 29.64  | 29.85  |
| C |   | 28.0  | 29.68  | 29.71  | 27.11  | 27.39  |
| C |   | 56.1  | 56.34  | 56.06  | 54.95  | 55.88  |
| C |   | 51.4  | 56.55  | 56.48  | 60.21  | 50.75  |

<sup>a</sup> The chemical shifts were measured in chloroform-*d*, the unscaled shifts were calculated in chloroform. Isomer 1 is configuration 1*R*\*,3*R*\*,4*R*\*-**2**, isomer 2 is 1*R*\*,3*S*\*,4*S*\*-**2**, isomer 3 is 1*S*\*,3*S*\*,4*R*\*-**2**, and isomer 4 is 1*R*\*,3*S*\*,4*R*\*-**2**.

**Table S4.** Experimental chemical shifts and calculated unscaled shifts for PD4+ probability analysis for **4<sup>a</sup>**.

| Nuclic | Sp2? | Experimental | mPW1PW91/6-311G(d,p), PCM |          |
|--------|------|--------------|---------------------------|----------|
|        |      |              | Isomer 1                  | Isomer 2 |
| C      |      | 95.3         | 97.85                     | 97.71    |
| C      |      | 70.1         | 72.49                     | 71.81    |
| C      |      | 68.7         | 72.62                     | 71.99    |
| C      | x    | 117.3        | 115.16                    | 115.98   |
| C      | x    | 150.5        | 148.55                    | 148.37   |
| C      | x    | 112.8        | 114.77                    | 114.46   |
| C      | x    | 116.2        | 119.93                    | 121.34   |
| C      | x    | 149.3        | 143.10                    | 141.76   |
| C      | x    | 128.8        | 124.74                    | 124.60   |
| C      |      | 30.8         | 33.26                     | 33.03    |
| C      |      | 26.0         | 28.62                     | 28.62    |
| C      |      | 32.0         | 33.47                     | 34.25    |
| C      |      | 30.4         | 26.67                     | 26.30    |
| C      |      | 14.2         | 15.09                     | 15.75    |
| C      |      | 22.8         | 27.96                     | 30.10    |
| C      |      | 88.4         | 87.92                     | 79.43    |
| C      |      | 76.1         | 78.68                     | 78.78    |
| C      |      | 22.2         | 25.57                     | 27.18    |
| C      |      | 19.6         | 25.12                     | 21.00    |
| C      |      | 55.8         | 55.75                     | 55.78    |
| C      |      | 50.2         | 53.35                     | 53.67    |
| C      |      | 53.8         | 56.24                     | 56.49    |

<sup>a</sup> The chemical shifts were measured in chloroform-*d*, the unscaled shifts were calculated in chloroform. Isomer 1 is configuration 1 is 1*R*\*,3*S*\*,4*S*\*,2''*R*\*-4, and isomer 2 is 1*R*\*,3*S*\*,4*S*\*,2''*S*\*-4.

**Table S5.** Experimental chemical shifts and calculated unscaled shifts for PD4+ probability analysis for **5<sup>a</sup>**.

| Nuclic | Sp2? | Experimental | mPW1PW91/6-311G(d,p), PCM |          |
|--------|------|--------------|---------------------------|----------|
|        |      |              | Isomer 1                  | Isomer 2 |
| C      |      | 95.2         | 98.55                     | 98.26    |
| C      |      | 70.5         | 75.26                     | 76.31    |
| C      |      | 68.9         | 72.78                     | 74.05    |
| C      | x    | 116.5        | 113.22                    | 113.69   |
| C      | x    | 150.2        | 151.04                    | 150.87   |
| C      | x    | 112.9        | 116.28                    | 116.51   |
| C      | x    | 117.4        | 122.01                    | 122.65   |
| C      | x    | 149.6        | 141.45                    | 141.66   |
| C      | x    | 128.8        | 125.45                    | 124.92   |
| C      |      | 30.4         | 35.67                     | 35.93    |
| C      |      | 26.0         | 36.18                     | 35.37    |
| C      |      | 32.0         | 38.38                     | 38.34    |
| C      |      | 22.8         | 29.01                     | 29.30    |
| C      |      | 14.2         | 16.64                     | 16.49    |
| C      |      | 31.0         | 36.22                     | 36.58    |
| C      |      | 89.7         | 83.43                     | 73.75    |
| C      |      | 72.1         | 80.85                     | 81.07    |
| C      |      | 24.3         | 24.42                     | 20.89    |
| C      |      | 26.1         | 27.37                     | 25.44    |
| C      |      | 55.6         | 56.31                     | 56.10    |
| C      |      | 53.9         | 54.89                     | 56.87    |

<sup>a</sup> The chemical shifts were measured in chloroform-*d*, the unscaled shifts were calculated in chloroform. Isomer 1 is configuration 1 is 1*R*\*,3*S*\*,4*S*\*,2''*R*\*-5, and isomer 2 is 1*R*\*,3*S*\*,4*S*\*,2''*S*\*-5.

**Table S6.** Experimental chemical shifts and calculated unscaled shifts for PD4+ probability analysis for **6<sup>a</sup>**.

| Nuclic | Sp2? | Experimental | mPW1PW91/6-311G(d,p), PCM |          |          |          |
|--------|------|--------------|---------------------------|----------|----------|----------|
|        |      |              | Isomer 1                  | Isomer 2 | Isomer 3 | Isomer 4 |
| C      |      | 96.6         | 102.74                    | 104.67   | 92.29    | 103.23   |
| C      |      | 72.6         | 76.92                     | 80.79    | 66.69    | 77.41    |
| C      |      | 70.9         | 75.11                     | 77.25    | 64.96    | 76.96    |
| C      | x    | 117.9        | 127.92                    | 125.66   | 112.34   | 128.32   |
| C      | x    | 151.4        | 161.90                    | 163.38   | 142.49   | 159.96   |

|   |   |       |        |        |        |        |
|---|---|-------|--------|--------|--------|--------|
| C | x | 112.9 | 124.43 | 128.21 | 106.33 | 122.84 |
| C | x | 123.0 | 136.03 | 135.34 | 118.88 | 134.36 |
| C | x | 150.9 | 152.76 | 153.27 | 135.96 | 153.03 |
| C | x | 131.3 | 135.04 | 135.65 | 119.09 | 134.88 |
| C |   | 31.9  | 37.98  | 39.35  | 29.04  | 38.02  |
| C |   | 26.8  | 31.79  | 40.50  | 24.55  | 32.49  |
| C |   | 33.0  | 38.65  | 42.47  | 30.67  | 38.40  |
| C |   | 23.7  | 30.35  | 32.45  | 22.00  | 30.14  |
| C |   | 14.4  | 18.62  | 20.14  | 11.28  | 17.88  |
| C |   | 74.0  | 77.67  | 73.68  | 67.95  | 74.84  |
| C |   | 98.3  | 98.77  | 80.15  | 72.48  | 83.67  |
| C |   | 72.0  | 87.02  | 88.96  | 75.35  | 86.39  |
| C |   | 25.4  | 28.92  | 25.21  | 22.97  | 22.93  |
| C |   | 25.8  | 27.21  | 28.46  | 14.06  | 30.61  |
| C |   | 58.4  | 59.94  | 60.95  | 50.35  | 60.22  |
| C |   | 49.6  | 58.59  | 60.18  | 48.93  | 58.77  |

<sup>a</sup> The chemical shifts were measured in methanol-*d*<sub>4</sub>, the unscaled shifts were calculated in methanol. Isomer 1 is configuration 1*R*\*,3*S*\*,4*S*\*,1''*R*\*,2''*R*\*-**6**, isomer 2 is 1*R*\*,3*S*\*,4*S*\*,1''*S*\*,2''*S*\*-**6**, isomer 3 is 1*R*\*,3*S*\*,4*S*\*,1''*R*\*,2''*S*\*-**6**, and isomer 4 1*R*\*,3*S*\*,4*S*\*,1''*S*\*,2''*R*\*-**6**.

## 5. Quantum chemical ECD calculations of 1–6

**Table S7.** Cartesian coordinate of dominant conformer of **1** and **2** (B3LYP/6-31+g(d))

| Cartesian coordinate of <b>1</b> |               |             |                         |           |           | Cartesian coordinate of <b>2</b> |               |             |                         |           |           |
|----------------------------------|---------------|-------------|-------------------------|-----------|-----------|----------------------------------|---------------|-------------|-------------------------|-----------|-----------|
| Standard orientation             |               |             |                         |           |           | Standard orientation             |               |             |                         |           |           |
| Center Number                    | Atomic Number | Atomic Type | Coordinates (Angstroms) |           |           | Center Number                    | Atomic Number | Atomic Type | Coordinates (Angstroms) |           |           |
|                                  |               |             | X                       | Y         | Z         |                                  |               |             | X                       | Y         | Z         |
| 1                                | 6             | 0           | -1.785856               | 1.254584  | -2.237779 | 1                                | 6             | 0           | -2.848329               | 2.329141  | -0.170235 |
| 2                                | 6             | 0           | -2.464652               | 0.227331  | -1.586587 | 2                                | 6             | 0           | -3.361792               | 1.035246  | -0.22654  |
| 3                                | 6             | 0           | -2.008932               | -0.205685 | -0.31333  | 3                                | 6             | 0           | -2.46289                | -0.059829 | -0.291968 |
| 4                                | 6             | 0           | -0.890559               | 0.382569  | 0.291251  | 4                                | 6             | 0           | -1.070765               | 0.1319    | -0.302422 |
| 5                                | 6             | 0           | -0.204847               | 1.418867  | -0.371266 | 5                                | 6             | 0           | -0.555303               | 1.437708  | -0.283909 |
| 6                                | 6             | 0           | -0.656501               | 1.84077   | -1.630346 | 6                                | 6             | 0           | -1.454579               | 2.519321  | -0.204062 |
| 7                                | 6             | 0           | -3.626502               | -0.448147 | -2.161122 | 7                                | 6             | 0           | -4.795275               | 0.747363  | -0.235785 |
| 8                                | 6             | 0           | -4.302192               | -1.357372 | -1.447834 | 8                                | 6             | 0           | -5.230795               | -0.516706 | -0.168341 |
| 9                                | 6             | 0           | -3.939369               | -1.71553  | -0.030228 | 9                                | 6             | 0           | -4.293253               | -1.69134  | -0.053467 |
| 10                               | 8             | 0           | -2.587147               | -1.242549 | 0.367155  | 10                               | 8             | 0           | -2.895122               | -1.353083 | -0.424456 |
| 11                               | 6             | 0           | -0.383221               | -0.050619 | 1.639185  | 11                               | 6             | 0           | -0.13984                | -1.054075 | -0.344468 |
| 12                               | 8             | 0           | 1.040403                | -0.111474 | 1.726777  | 12                               | 8             | 0           | 1.169544                | -0.708683 | -0.802778 |
| 13                               | 6             | 0           | 1.841722                | 0.81124   | 0.945561  | 13                               | 6             | 0           | 1.765537                | 0.411227  | -0.095326 |
| 14                               | 6             | 0           | 0.970243                | 1.973725  | 0.389107  | 14                               | 6             | 0           | 0.927469                | 1.667342  | -0.439    |
| 15                               | 6             | 0           | 2.521192                | 0.011265  | -0.169837 | 15                               | 6             | 0           | 3.194625                | 0.500428  | -0.628994 |
| 16                               | 6             | 0           | 3.593743                | -0.931842 | 0.384603  | 16                               | 6             | 0           | 4.116678                | -0.525695 | 0.039999  |

|    |   |   |           |           |           |    |   |   |           |           |           |
|----|---|---|-----------|-----------|-----------|----|---|---|-----------|-----------|-----------|
| 17 | 6 | 0 | 4.236668  | -1.765059 | -0.731257 | 17 | 6 | 0 | 5.546628  | -0.431939 | -0.507263 |
| 18 | 6 | 0 | 5.313787  | -2.708497 | -0.177658 | 18 | 6 | 0 | 6.472261  | -1.457057 | 0.162994  |
| 19 | 6 | 0 | 5.957388  | -3.542165 | -1.283649 | 19 | 6 | 0 | 7.897752  | -1.36825  | -0.377404 |
| 20 | 8 | 0 | 1.803728  | 2.741113  | -0.517933 | 20 | 8 | 0 | 1.375439  | 2.81955   | 0.31023   |
| 21 | 6 | 0 | 2.353262  | 3.943851  | 0.06191   | 21 | 6 | 0 | 1.320083  | 2.709148  | 1.751545  |
| 22 | 8 | 0 | -0.813463 | 0.99162   | 2.534844  | 22 | 8 | 0 | -0.026316 | -1.485711 | 1.020263  |
| 23 | 6 | 0 | -0.531712 | 0.732753  | 3.924952  | 23 | 6 | 0 | 0.655806  | -2.746124 | 1.185403  |
| 24 | 8 | 0 | -0.066325 | 2.835217  | -2.362733 | 24 | 8 | 0 | -1.059619 | 3.830492  | -0.158668 |
| 25 | 6 | 0 | -3.802278 | -3.222445 | 0.168446  | 25 | 6 | 0 | -4.216768 | -2.194703 | 1.385909  |
| 26 | 6 | 0 | -4.89231  | -1.055859 | 0.964084  | 26 | 6 | 0 | -4.611933 | -2.788764 | -1.064977 |
| 27 | 1 | 0 | -2.10325  | 1.618387  | -3.214797 | 27 | 1 | 0 | -3.499029 | 3.200954  | -0.110159 |
| 28 | 1 | 0 | -3.901649 | -0.183662 | -3.182508 | 28 | 1 | 0 | -5.473548 | 1.597893  | -0.307296 |
| 29 | 1 | 0 | -5.1691   | -1.883092 | -1.842675 | 29 | 1 | 0 | -6.287952 | -0.772995 | -0.173396 |
| 30 | 1 | 0 | -0.705268 | -1.053681 | 1.984444  | 30 | 1 | 0 | -0.446593 | -1.870922 | -1.028319 |
| 31 | 1 | 0 | 2.572134  | 1.192362  | 1.691962  | 31 | 1 | 0 | 1.72211   | 0.18606   | 0.993912  |
| 32 | 1 | 0 | 0.597905  | 2.615797  | 1.224499  | 32 | 1 | 0 | 1.142758  | 2.017181  | -1.483028 |
| 33 | 1 | 0 | 2.959046  | 0.716707  | -0.906669 | 33 | 1 | 0 | 3.579901  | 1.528879  | -0.471504 |
| 34 | 1 | 0 | 1.754951  | -0.569005 | -0.7232   | 34 | 1 | 0 | 3.184511  | 0.335257  | -1.726943 |
| 35 | 1 | 0 | 3.133422  | -1.598944 | 1.142603  | 35 | 1 | 0 | 3.71104   | -1.543971 | -0.128307 |
| 36 | 1 | 0 | 4.370376  | -0.353751 | 0.919942  | 36 | 1 | 0 | 4.121426  | -0.375744 | 1.136482  |
| 37 | 1 | 0 | 4.678023  | -1.097913 | -1.496146 | 37 | 1 | 0 | 5.94516   | 0.589439  | -0.354744 |
| 38 | 1 | 0 | 3.459673  | -2.351913 | -1.258492 | 38 | 1 | 0 | 5.542748  | -0.591479 | -1.603013 |
| 39 | 1 | 0 | 4.869779  | -3.378266 | 0.58483   | 39 | 1 | 0 | 6.076668  | -2.479724 | 0.005993  |
| 40 | 1 | 0 | 6.091854  | -2.123431 | 0.35018   | 40 | 1 | 0 | 6.47811   | -1.299523 | 1.259235  |
| 41 | 1 | 0 | 6.723695  | -4.212616 | -0.879524 | 41 | 1 | 0 | 7.932749  | -1.55758  | -1.456414 |
| 42 | 1 | 0 | 6.438431  | -2.909177 | -2.03783  | 42 | 1 | 0 | 8.551155  | -2.103205 | 0.10569   |
| 43 | 1 | 0 | 5.217778  | -4.163117 | -1.801956 | 43 | 1 | 0 | 8.334111  | -0.377798 | -0.205161 |
| 44 | 1 | 0 | 1.553201  | 4.636289  | 0.341133  | 44 | 1 | 0 | 1.49736   | 3.740739  | 2.078204  |
| 45 | 1 | 0 | 2.985375  | 3.69649   | 0.919753  | 45 | 1 | 0 | 0.339221  | 2.352503  | 2.082243  |
| 46 | 1 | 0 | 2.959683  | 4.350582  | -0.757631 | 46 | 1 | 0 | 2.120453  | 2.049659  | 2.098645  |
| 47 | 1 | 0 | 0.534233  | 0.522489  | 4.062303  | 47 | 1 | 0 | 0.042075  | -3.556293 | 0.781859  |
| 48 | 1 | 0 | -0.817399 | 1.672122  | 4.410503  | 48 | 1 | 0 | 1.638734  | -2.711634 | 0.703728  |
| 49 | 1 | 0 | -1.149362 | -0.096369 | 4.281192  | 49 | 1 | 0 | 0.750591  | -2.829715 | 2.273684  |
| 50 | 1 | 0 | 0.794232  | 3.150323  | -1.925408 | 50 | 1 | 0 | -0.048585 | 3.915754  | -0.108578 |
| 51 | 1 | 0 | -3.339217 | -3.446123 | 1.139657  | 51 | 1 | 0 | -3.965961 | -1.379658 | 2.077869  |
| 52 | 1 | 0 | -4.771799 | -3.728046 | 0.132336  | 52 | 1 | 0 | -5.158895 | -2.640701 | 1.716495  |
| 53 | 1 | 0 | -3.153364 | -3.666798 | -0.597544 | 53 | 1 | 0 | -3.423807 | -2.946942 | 1.493502  |
| 54 | 1 | 0 | -5.910584 | -1.445678 | 0.87687   | 54 | 1 | 0 | -5.54157  | -3.310796 | -0.81947  |
| 55 | 1 | 0 | -4.55269  | -1.214874 | 1.99592   | 55 | 1 | 0 | -4.704194 | -2.379368 | -2.079437 |
| 56 | 1 | 0 | -4.932118 | 0.031083  | 0.81214   | 56 | 1 | 0 | -3.804066 | -3.532839 | -1.09864  |

**Table S8.** Cartesian coordinate of dominant conformer of **3** and **4** (B3LYP/6-31+g(d))

| Cartesian coordinate of <b>3</b> |        |        |                         | Cartesian coordinate of <b>4</b> |        |        |                         |
|----------------------------------|--------|--------|-------------------------|----------------------------------|--------|--------|-------------------------|
| Standard orientation             |        |        |                         | Standard orientation             |        |        |                         |
| Center                           | Atomic | Atomic | Coordinates (Angstroms) | Center                           | Atomic | Atomic | Coordinates (Angstroms) |



| Number | Number | Type | X         | Y         | Z         | Number | Number | Type | X         | Y         | Z         |
|--------|--------|------|-----------|-----------|-----------|--------|--------|------|-----------|-----------|-----------|
| 1      | 6      | 0    | -1.975802 | -1.149492 | -2.076446 | 1      | 6      | 0    | 1.911771  | 2.328097  | 0.803504  |
| 2      | 6      | 0    | -2.554877 | -0.306555 | -1.134997 | 2      | 6      | 0    | 2.676991  | 1.179529  | 0.614574  |
| 3      | 6      | 0    | -1.932661 | -0.170981 | 0.139958  | 3      | 6      | 0    | 2.062843  | 0.037683  | 0.047188  |
| 4      | 6      | 0    | -0.778604 | -0.880224 | 0.46427   | 4      | 6      | 0    | 0.691794  | 0.014468  | -0.258391 |
| 5      | 6      | 0    | -0.196928 | -1.741854 | -0.492019 | 5      | 6      | 0    | -0.088633 | 1.155764  | -0.023493 |
| 6      | 6      | 0    | -0.795304 | -1.85656  | -1.751874 | 6      | 6      | 0    | 0.549878  | 2.31602   | 0.454941  |
| 7      | 6      | 0    | -0.10756  | -0.766228 | 1.806936  | 7      | 6      | 0    | 0.066493  | -1.2071   | -0.885195 |
| 8      | 8      | 0    | 1.317137  | -0.712799 | 1.729336  | 8      | 8      | 0    | -1.135574 | -0.881766 | -1.590078 |
| 9      | 6      | 0    | 2.000013  | -1.450741 | 0.682604  | 9      | 6      | 0    | -2.12377  | -0.194967 | -0.770618 |
| 10     | 6      | 0    | 1.038048  | -2.455211 | -0.015032 | 10     | 6      | 0    | -1.571011 | 1.172637  | -0.296571 |
| 11     | 6      | 0    | 2.582117  | -0.429619 | -0.299582 | 11     | 6      | 0    | -3.360677 | -0.108699 | -1.664184 |
| 12     | 6      | 0    | 3.729024  | 0.368487  | 0.32858   | 12     | 6      | 0    | -4.577672 | -0.825695 | -1.070519 |
| 13     | 6      | 0    | 4.275884  | 1.422083  | -0.643193 | 13     | 6      | 0    | -5.169385 | -0.075579 | 0.130516  |
| 14     | 6      | 0    | 5.426112  | 2.219775  | -0.014596 | 14     | 6      | 0    | -6.405002 | -0.794762 | 0.687405  |
| 15     | 6      | 0    | 5.97397   | 3.276155  | -0.984521 | 15     | 6      | 0    | -6.996832 | -0.045432 | 1.889602  |
| 16     | 6      | 0    | 7.119426  | 4.073479  | -0.364289 | 16     | 6      | 0    | -8.228712 | -0.755101 | 2.447172  |
| 17     | 8      | 0    | 1.744802  | -2.999768 | -1.161492 | 17     | 8      | 0    | -1.901537 | 2.270757  | -1.177915 |
| 18     | 8      | 0    | -0.446009 | -1.988539 | 2.485315  | 18     | 8      | 0    | -0.279551 | -2.068109 | 0.206778  |
| 19     | 8      | 0    | -0.311184 | -2.645324 | -2.757481 | 19     | 8      | 0    | -0.104611 | 3.512444  | 0.612781  |
| 20     | 6      | 0    | -3.777592 | 0.445143  | -1.383016 | 20     | 6      | 0    | 4.127905  | 1.157118  | 0.981479  |
| 21     | 6      | 0    | -4.155083 | 1.382411  | -0.492606 | 21     | 6      | 0    | 4.701951  | -0.266384 | 0.964247  |
| 22     | 8      | 0    | -2.474066 | 0.616094  | 1.138859  | 22     | 8      | 0    | 2.744581  | -1.129259 | -0.223415 |
| 23     | 6      | 0    | -3.335475 | 1.743393  | 0.750244  | 23     | 6      | 0    | 4.21735   | -1.071241 | -0.277882 |
| 24     | 8      | 0    | -5.263219 | 2.185788  | -0.54346  | 24     | 8      | 0    | 6.135119  | -0.198598 | 0.795328  |
| 25     | 6      | 0    | -0.022538 | -2.039031 | 3.86278   | 25     | 6      | 0    | 6.869416  | -0.009857 | 2.019357  |
| 26     | 6      | 0    | 2.312789  | -4.307713 | -0.936377 | 26     | 6      | 0    | -0.685331 | -3.394522 | -0.191013 |
| 27     | 6      | 0    | -4.2011   | 1.918924  | 1.989391  | 27     | 6      | 0    | -1.223713 | 2.265319  | -2.456581 |
| 28     | 6      | 0    | -2.429766 | 2.931192  | 0.446928  | 28     | 6      | 0    | 4.639154  | -0.44152  | -1.595675 |
| 29     | 6      | 0    | -6.168035 | 2.007272  | -1.664437 | 29     | 6      | 0    | 4.585654  | -2.54533  | -0.166331 |
| 30     | 1      | 0    | -2.408738 | -1.283233 | -3.066541 | 30     | 1      | 0    | 2.343565  | 3.242066  | 1.20896   |
| 31     | 1      | 0    | -0.36642  | 0.129504  | 2.406782  | 31     | 1      | 0    | 0.692291  | -1.710967 | -1.648935 |
| 32     | 1      | 0    | 2.79316   | -1.992085 | 1.242383  | 32     | 1      | 0    | -2.291331 | -0.837355 | 0.129308  |
| 33     | 1      | 0    | 0.745811  | -3.269596 | 0.691624  | 33     | 1      | 0    | -2.138543 | 1.490736  | 0.617924  |
| 34     | 1      | 0    | 2.924095  | -0.960669 | -1.21249  | 34     | 1      | 0    | -3.608265 | 0.953811  | -1.876128 |
| 35     | 1      | 0    | 1.777484  | 0.257085  | -0.631837 | 35     | 1      | 0    | -3.109826 | -0.555823 | -2.651448 |
| 36     | 1      | 0    | 3.365979  | 0.856291  | 1.256784  | 36     | 1      | 0    | -5.350216 | -0.934449 | -1.857771 |
| 37     | 1      | 0    | 4.541502  | -0.313757 | 0.642349  | 37     | 1      | 0    | -4.305009 | -1.858586 | -0.777935 |
| 38     | 1      | 0    | 4.620189  | 0.933033  | -1.574669 | 38     | 1      | 0    | -4.406073 | 0.029894  | 0.924951  |
| 39     | 1      | 0    | 3.462963  | 2.10963   | -0.94729  | 39     | 1      | 0    | -5.435548 | 0.957498  | -0.167102 |
| 40     | 1      | 0    | 5.080718  | 2.708789  | 0.916585  | 40     | 1      | 0    | -7.172003 | -0.897139 | -0.104099 |
| 41     | 1      | 0    | 6.239125  | 1.533879  | 0.291068  | 41     | 1      | 0    | -6.140045 | -1.827795 | 0.983852  |
| 42     | 1      | 0    | 6.320203  | 2.78764   | -1.916257 | 42     | 1      | 0    | -6.231859 | 0.054718  | 2.684412  |
| 43     | 1      | 0    | 5.161285  | 3.964529  | -1.288564 | 43     | 1      | 0    | -7.262879 | 0.988573  | 1.59466   |
| 44     | 1      | 0    | 7.502949  | 4.824823  | -1.063291 | 44     | 1      | 0    | -9.022169 | -0.83696  | 1.695738  |
| 45     | 1      | 0    | 6.799303  | 4.600596  | 0.541621  | 45     | 1      | 0    | -7.991425 | -1.770312 | 2.784828  |

|    |   |   |           |           |           |    |   |   |           |           |           |
|----|---|---|-----------|-----------|-----------|----|---|---|-----------|-----------|-----------|
| 46 | 1 | 0 | 7.957886  | 3.424984  | -0.086255 | 46 | 1 | 0 | -8.643467 | -0.213033 | 3.304363  |
| 47 | 1 | 0 | 0.578681  | -3.064616 | -2.499794 | 47 | 1 | 0 | -0.979024 | 3.517394  | 0.105362  |
| 48 | 1 | 0 | -4.340233 | 0.202935  | -2.277855 | 48 | 1 | 0 | 4.280549  | 1.614389  | 1.980204  |
| 49 | 1 | 0 | -0.59703  | -1.32095  | 4.4547    | 49 | 1 | 0 | 4.710581  | 1.793837  | 0.277612  |
| 50 | 1 | 0 | -0.263369 | -3.06751  | 4.153118  | 50 | 1 | 0 | 4.447094  | -0.811738 | 1.897915  |
| 51 | 1 | 0 | 1.052918  | -1.846714 | 3.935437  | 51 | 1 | 0 | 6.689985  | -0.83934  | 2.709442  |
| 52 | 1 | 0 | 2.813387  | -4.520998 | -1.889458 | 52 | 1 | 0 | 7.910659  | -0.010902 | 1.672444  |
| 53 | 1 | 0 | 3.041286  | -4.268999 | -0.12123  | 53 | 1 | 0 | 6.61616   | 0.950175  | 2.477082  |
| 54 | 1 | 0 | 1.524537  | -5.039162 | -0.733091 | 54 | 1 | 0 | 0.171809  | -3.938759 | -0.597193 |
| 55 | 1 | 0 | -4.682271 | 0.970525  | 2.269282  | 55 | 1 | 0 | -1.018695 | -3.837581 | 0.754299  |
| 56 | 1 | 0 | -3.607362 | 2.242023  | 2.852811  | 56 | 1 | 0 | -1.505639 | -3.340021 | -0.914029 |
| 57 | 1 | 0 | -4.993768 | 2.65861   | 1.813064  | 57 | 1 | 0 | -1.828838 | 2.951066  | -3.057799 |
| 58 | 1 | 0 | -3.012545 | 3.838358  | 0.247336  | 58 | 1 | 0 | -0.204396 | 2.640081  | -2.324069 |
| 59 | 1 | 0 | -1.757003 | 3.137515  | 1.289352  | 59 | 1 | 0 | -1.209798 | 1.257433  | -2.887952 |
| 60 | 1 | 0 | -1.792958 | 2.741001  | -0.4273   | 60 | 1 | 0 | 4.36824   | -1.069544 | -2.451507 |
| 61 | 1 | 0 | -6.578807 | 0.993306  | -1.659706 | 61 | 1 | 0 | 4.166509  | 0.535623  | -1.752549 |
| 62 | 1 | 0 | -6.944388 | 2.751184  | -1.446244 | 62 | 1 | 0 | 5.728704  | -0.288283 | -1.612932 |
| 63 | 1 | 0 | -5.654606 | 2.233786  | -2.603276 | 63 | 1 | 0 | 4.302536  | -3.102253 | -1.067314 |
|    |   |   |           |           |           | 64 | 1 | 0 | 5.668118  | -2.65805  | -0.018679 |
|    |   |   |           |           |           | 65 | 1 | 0 | 4.068058  | -3.024836 | 0.675056  |

**Table S9.** Cartesian coordinate of dominant conformer of **5** and **6** (B3LYP/6-31+g(d))

| Cartesian coordinate of <b>5</b> |               |             |                         |           |           | Cartesian coordinate of <b>6</b> |               |             |                         |           |           |
|----------------------------------|---------------|-------------|-------------------------|-----------|-----------|----------------------------------|---------------|-------------|-------------------------|-----------|-----------|
| Standard orientation             |               |             |                         |           |           | Standard orientation             |               |             |                         |           |           |
| Center Number                    | Atomic Number | Atomic Type | Coordinates (Angstroms) |           |           | Center Number                    | Atomic Number | Atomic Type | Coordinates (Angstroms) |           |           |
|                                  |               |             | X                       | Y         | Z         |                                  |               |             | X                       | Y         | Z         |
| 1                                | 6             | 0           | -2.342091               | 2.362504  | -0.687082 | 1                                | 6             | 0           | -2.31474                | 2.126359  | -0.821478 |
| 2                                | 6             | 0           | -2.973962               | 1.139092  | -0.473678 | 2                                | 6             | 0           | -2.853231               | 0.884494  | -0.501859 |
| 3                                | 6             | 0           | -2.182796               | 0.009739  | -0.159983 | 3                                | 6             | 0           | -1.991373               | -0.147483 | -0.071681 |
| 4                                | 6             | 0           | -0.779597               | 0.077782  | -0.132927 | 4                                | 6             | 0           | -0.598205               | 0.023915  | -0.033966 |
| 5                                | 6             | 0           | -0.141592               | 1.298233  | -0.395024 | 5                                | 6             | 0           | -0.049271               | 1.262375  | -0.396873 |
| 6                                | 6             | 0           | -0.940281               | 2.437914  | -0.614642 | 6                                | 6             | 0           | -0.923401               | 2.315527  | -0.732593 |
| 7                                | 6             | 0           | -4.464572               | 1.025317  | -0.554319 | 7                                | 6             | 0           | -4.341225               | 0.644393  | -0.621423 |
| 8                                | 6             | 0           | -4.932204               | -0.436454 | -0.553141 | 8                                | 6             | 0           | -4.776694               | -0.600827 | 0.19507   |
| 9                                | 6             | 0           | -4.141064               | -1.302091 | 0.472367  | 9                                | 6             | 0           | -3.799476               | -1.788678 | -0.005924 |
| 10                               | 8             | 0           | -2.714827               | -1.233169 | 0.116217  | 10                               | 8             | 0           | -2.458296               | -1.349674 | 0.426062  |
| 11                               | 6             | 0           | 0.041171                | -1.13607  | 0.227681  | 11                               | 6             | 0           | 0.302641                | -1.087775 | 0.444885  |
| 12                               | 8             | 0           | 1.333633                | -0.768753 | 0.719576  | 12                               | 8             | 0           | 1.564483                | -0.591254 | 0.895347  |
| 13                               | 6             | 0           | 2.09058                 | 0.068986  | -0.198453 | 13                               | 6             | 0           | 2.263472                | 0.219868  | -0.090567 |
| 14                               | 6             | 0           | 1.360781                | 1.417791  | -0.423458 | 14                               | 6             | 0           | 1.441617                | 1.49164   | -0.420158 |
| 15                               | 6             | 0           | 3.468464                | 0.192355  | 0.451016  | 15                               | 6             | 0           | 3.627221                | 0.491161  | 0.543109  |
| 16                               | 6             | 0           | 4.559127                | -0.505324 | -0.369327 | 16                               | 6             | 0           | 4.772717                | -0.135312 | -0.25965  |
| 17                               | 6             | 0           | 5.930075                | -0.379109 | 0.308577  | 17                               | 6             | 0           | 6.130598                | 0.141762  | 0.399634  |
| 18                               | 6             | 0           | 7.027407                | -1.072619 | -0.510993 | 18                               | 6             | 0           | 7.30024                 | -0.455202 | -0.396276 |
| 19                               | 6             | 0           | 8.394154                | -0.950652 | 0.159085  | 19                               | 6             | 0           | 7.38423                 | -1.975587 | -0.280763 |

|    |   |   |           |           |           |    |   |   |           |           |           |
|----|---|---|-----------|-----------|-----------|----|---|---|-----------|-----------|-----------|
| 20 | 8 | 0 | 1.794158  | 2.469466  | 0.469112  | 20 | 8 | 0 | 1.782636  | 2.634415  | 0.394463  |
| 21 | 6 | 0 | 1.404627  | 2.309559  | 1.853621  | 21 | 6 | 0 | 1.386474  | 2.548516  | 1.783867  |
| 22 | 8 | 0 | 0.220369  | -1.860066 | -0.995202 | 22 | 8 | 0 | 0.529657  | -1.917354 | -0.702366 |
| 23 | 6 | 0 | 0.784825  | -3.177559 | -0.825987 | 23 | 6 | 0 | 1.227852  | -3.147015 | -0.413072 |
| 24 | 8 | 0 | -0.41445  | 3.695423  | -0.769104 | 24 | 8 | 0 | -0.487059 | 3.588053  | -0.998496 |
| 25 | 6 | 0 | -4.437727 | -2.784461 | 0.287701  | 25 | 6 | 0 | -4.074954 | -2.931105 | 0.961032  |
| 26 | 6 | 0 | -4.297746 | -0.837683 | 1.914733  | 26 | 6 | 0 | -3.720173 | -2.236303 | -1.456938 |
| 27 | 8 | 0 | -6.33311  | -0.516006 | -0.292278 | 27 | 8 | 0 | -4.836271 | -0.213611 | 1.572575  |
| 28 | 1 | 0 | -2.90763  | 3.267549  | -0.905691 | 28 | 8 | 0 | -5.083667 | 1.771924  | -0.171625 |
| 29 | 1 | 0 | -4.932941 | 1.584922  | 0.282796  | 29 | 1 | 0 | -2.960115 | 2.957912  | -1.118124 |
| 30 | 1 | 0 | -4.840122 | 1.525701  | -1.474292 | 30 | 1 | 0 | -4.637139 | 0.562255  | -1.695798 |
| 31 | 1 | 0 | -4.853988 | -0.884304 | -1.573711 | 31 | 1 | 0 | -5.830102 | -0.881893 | -0.028928 |
| 32 | 1 | 0 | -0.38242  | -1.760315 | 1.039881  | 32 | 1 | 0 | -0.079822 | -1.658073 | 1.315309  |
| 33 | 1 | 0 | 2.121743  | -0.476318 | -1.174113 | 33 | 1 | 0 | 2.335163  | -0.399453 | -1.018441 |
| 34 | 1 | 0 | 1.702989  | 1.851091  | -1.400963 | 34 | 1 | 0 | 1.76441   | 1.87508   | -1.425089 |
| 35 | 1 | 0 | 3.725942  | 1.262559  | 0.602385  | 35 | 1 | 0 | 3.787941  | 1.585178  | 0.653159  |
| 36 | 1 | 0 | 3.419716  | -0.248086 | 1.47108   | 36 | 1 | 0 | 3.622766  | 0.087274  | 1.579391  |
| 37 | 1 | 0 | 4.30281   | -1.574886 | -0.502519 | 37 | 1 | 0 | 4.618061  | -1.228777 | -0.349007 |
| 38 | 1 | 0 | 4.60331   | -0.071791 | -1.387319 | 38 | 1 | 0 | 4.772361  | 0.259079  | -1.294189 |
| 39 | 1 | 0 | 6.185772  | 0.688921  | 0.449119  | 39 | 1 | 0 | 6.27915   | 1.234857  | 0.500651  |
| 40 | 1 | 0 | 5.890323  | -0.814247 | 1.325773  | 40 | 1 | 0 | 6.136717  | -0.258696 | 1.431897  |
| 41 | 1 | 0 | 6.774198  | -2.141785 | -0.650883 | 41 | 1 | 0 | 7.218514  | -0.164801 | -1.462129 |
| 42 | 1 | 0 | 7.070224  | -0.636352 | -1.52826  | 42 | 1 | 0 | 8.247947  | -0.006614 | -0.036486 |
| 43 | 1 | 0 | 8.693277  | 0.096976  | 0.278339  | 43 | 1 | 0 | 8.235026  | -2.369873 | -0.847281 |
| 44 | 1 | 0 | 8.397818  | -1.407291 | 1.155335  | 44 | 1 | 0 | 7.505582  | -2.293961 | 0.760862  |
| 45 | 1 | 0 | 9.170951  | -1.447897 | -0.432494 | 45 | 1 | 0 | 6.479409  | -2.459495 | -0.665619 |
| 46 | 1 | 0 | 1.546454  | 1.273944  | 2.183889  | 46 | 1 | 0 | 0.317762  | 2.767312  | 1.867079  |
| 47 | 1 | 0 | 2.079404  | 2.993403  | 2.378364  | 47 | 1 | 0 | 1.611272  | 1.557652  | 2.195265  |
| 48 | 1 | 0 | 0.359021  | 2.609998  | 1.968919  | 48 | 1 | 0 | 1.993101  | 3.326545  | 2.258675  |
| 49 | 1 | 0 | 1.727235  | -3.119013 | -0.271774 | 49 | 1 | 0 | 2.163339  | -2.93753  | 0.116716  |
| 50 | 1 | 0 | 0.063871  | -3.828748 | -0.32394  | 50 | 1 | 0 | 0.582046  | -3.813194 | 0.165396  |
| 51 | 1 | 0 | 0.951528  | -3.501793 | -1.859624 | 51 | 1 | 0 | 1.421128  | -3.555342 | -1.411466 |
| 52 | 1 | 0 | 0.548313  | 3.728805  | -0.459606 | 52 | 1 | 0 | 0.456886  | 3.727098  | -0.663504 |
| 53 | 1 | 0 | -3.96422  | -3.168148 | -0.628279 | 53 | 1 | 0 | -4.415667 | -2.56294  | 1.940487  |
| 54 | 1 | 0 | -4.052848 | -3.389005 | 1.11633   | 54 | 1 | 0 | -4.84301  | -3.612357 | 0.579035  |
| 55 | 1 | 0 | -5.519409 | -2.958865 | 0.205761  | 55 | 1 | 0 | -3.162146 | -3.518767 | 1.137545  |
| 56 | 1 | 0 | -3.585297 | -1.363741 | 2.566431  | 56 | 1 | 0 | -3.345792 | -1.444671 | -2.119584 |
| 57 | 1 | 0 | -4.089153 | 0.231955  | 2.033003  | 57 | 1 | 0 | -3.010334 | -3.070649 | -1.565637 |
| 58 | 1 | 0 | -5.301795 | -1.042564 | 2.300389  | 58 | 1 | 0 | -4.688047 | -2.572893 | -1.842098 |
| 59 | 1 | 0 | -6.556747 | -0.119341 | 0.574513  | 59 | 1 | 0 | -3.918937 | -0.161863 | 1.945391  |
|    |   |   |           |           |           | 60 | 1 | 0 | -5.115245 | 1.783274  | 0.822595  |

**Table S10.** Key transitions and their related rotatory and oscillator strengths of dominant conformer of **1** at the B3LYP/6-31+g(d) level.

|            |
|------------|
| HOMO is 98 |
|------------|

| No. | Energy (cm-1) | Wavelength (nm) | R(length) | Osc. Strength | Major contribs                                                                        |
|-----|---------------|-----------------|-----------|---------------|---------------------------------------------------------------------------------------|
| 1   | 31683.07108   | 315.6259687     | 25.9821   | 0.188         | HOMO->LUMO (95%)                                                                      |
| 2   | 38717.03226   | 258.2842593     | 7.2641    | 0.007         | H-1->LUMO (26%), HOMO->L+2 (60%)                                                      |
| 3   | 42819.16808   | 233.5402683     | 6.04      | 0.0054        | HOMO->L+1 (65%), HOMO->L+3 (14%)                                                      |
| 4   | 44523.41759   | 224.6009076     | 14.2536   | 0.655         | H-1->LUMO (69%), HOMO->L+2 (27%)                                                      |
| 5   | 46322.84052   | 215.8762262     | 2.0096    | 0.0064        | HOMO->L+3 (16%), HOMO->L+4 (56%)                                                      |
| 6   | 47802.8679    | 209.1924698     | 26.2184   | 0.2445        | H-1->L+2 (64%)                                                                        |
| 7   | 48171.46327   | 207.591784      | 1.1449    | 0.0177        | HOMO->L+3 (35%), HOMO->L+5 (31%)                                                      |
| 8   | 48819.12648   | 204.8377495     | 12.5402   | 0.0402        | HOMO->L+5 (37%), HOMO->L+7 (18%)                                                      |
| 9   | 50516.117     | 197.9566244     | 33.5187   | 0.0194        | HOMO->L+1 (12%), HOMO->L+6 (11%), HOMO->L+8 (15%), HOMO->L+10 (12%), HOMO->L+11 (11%) |
| 10  | 51016.9873    | 196.0131425     | -19.2966  | 0.0408        | H-2->LUMO (69%)                                                                       |
| 11  | 51432.36283   | 194.4301107     | -8.2791   | 0.0019        | H-1->L+1 (13%), HOMO->L+8 (29%), HOMO->L+13 (13%)                                     |
| 12  | 51944.52489   | 192.5130708     | -5.1114   | 0.0161        | HOMO->L+4 (14%), HOMO->L+9 (27%)                                                      |
| 13  | 52520.40475   | 190.4021884     | -29.1605  | 0.0232        | H-3->LUMO (11%), H-1->L+1 (24%), HOMO->L+9 (13%)                                      |
| 14  | 52602.67331   | 190.1044067     | 2.3638    | 0.0084        | H-3->LUMO (58%)                                                                       |
| 15  | 53370.51312   | 187.3693809     | -57.4406  | 0.1958        | HOMO->L+12 (12%), HOMO->L+13 (11%), HOMO->L+20 (11%), HOMO->L+23 (10%)                |
| 16  | 53705.23321   | 186.2015934     | 3.7092    | 0.0155        | HOMO->L+10 (26%), HOMO->L+11 (18%), HOMO->L+16 (17%)                                  |
| 17  | 54665.83953   | 182.9295971     | 9.477     | 0.0462        | H-5->LUMO (10%), H-4->LUMO (38%)                                                      |
| 18  | 54930.38939   | 182.0485912     | -4.3338   | 0.0361        | HOMO->L+11 (21%), HOMO->L+16 (17%)                                                    |
| 19  | 55225.58831   | 181.0754816     | -4.9198   | 0.0129        | H-1->L+5 (16%), HOMO->L+8 (10%), HOMO->L+15 (21%)                                     |
| 20  | 56312.01712   | 177.5819889     | -3.2207   | 0.0155        | H-1->L+4 (20%), HOMO->L+13 (13%)                                                      |
| 21  | 56456.39037   | 177.1278669     | -15.4815  | 0.0116        | H-1->L+3 (17%), H-1->L+4 (20%)                                                        |
| 22  | 56642.70444   | 176.5452427     | -2.4206   | 0.0007        | H-8->LUMO (13%), H-6->LUMO (18%), H-5->LUMO (11%), H-4->LUMO (12%)                    |
| 23  | 57153.25339   | 174.9681673     | -9.1858   | 0.0048        | H-5->LUMO (33%)                                                                       |
| 24  | 57208.09909   | 174.8004244     | -4.0434   | 0.0011        | HOMO->L+17 (25%)                                                                      |
| 25  | 57373.44275   | 174.2966697     | 29.0971   | 0.0263        | H-1->L+3 (24%)                                                                        |
| 26  | 57629.12051   | 173.5233839     | -0.4752   | 0.0131        | H-1->L+5 (20%), HOMO->L+12 (17%)                                                      |
| 27  | 57900.92935   | 172.7087995     | -13.5094  | 0.0258        | HOMO->L+6 (20%), HOMO->L+7 (15%), HOMO->L+20 (14%)                                    |
| 28  | 58194.51516   | 171.8375        | -6.4838   | 0.0094        | HOMO->L+9 (11%), HOMO->L+10 (16%), HOMO->L+16 (28%)                                   |
| 29  | 58596.17927   | 170.6595912     | -10.1377  | 0.0236        | H-2->L+2 (28%)                                                                        |
| 30  | 58733.29352   | 170.2611824     | -0.8904   | 0.0503        |                                                                                       |
| 31  | 58787.33267   | 170.104673      | -6.7732   | 0.0046        |                                                                                       |
| 32  | 58896.21751   | 169.7901906     | 27.5159   | 0.0061        | HOMO->L+23 (13%)                                                                      |
| 33  | 59064.78739   | 169.3056124     | 10.2424   | 0.0087        | HOMO->L+19 (30%)                                                                      |
| 34  | 59370.47152   | 168.4338989     | 0.1245    | 0.0013        | HOMO->L+20 (17%)                                                                      |
| 35  | 59864.08283   | 167.0450716     | -14.679   | 0.0052        | HOMO->L+19 (14%)                                                                      |
| 36  | 60181.86527   | 166.163012      | 0.7417    | 0.0018        | H-3->L+2 (24%)                                                                        |
| 37  | 60499.64772   | 165.2902187     | -12.0204  | 0.036         |                                                                                       |
| 38  | 60618.21122   | 164.9669266     | -4.5242   | 0.0089        |                                                                                       |
| 39  | 61019.87533   | 163.8810297     | -24.6255  | 0.0157        |                                                                                       |
| 40  | 61118.27497   | 163.6171833     | 56.0948   | 0.0543        |                                                                                       |
| 41  | 61337.65777   | 163.0319833     | -0.0829   | 0.0115        | H-1->L+9 (12%)                                                                        |
| 42  | 61588.4962    | 162.3679846     | -1.9993   | 0.003         |                                                                                       |
| 43  | 61723.19079   | 162.0136592     | 3.0827    | 0.0096        | H-10->LUMO (20%), H-9->LUMO (19%)                                                     |
| 44  | 61917.57041   | 161.5050451     | 3.8611    | 0.0118        | H-4->L+2 (17%), H-3->L+2 (10%)                                                        |
| 45  | 62067.58953   | 161.1146828     | 4.7362    | 0.0261        | H-9->LUMO (10%)                                                                       |

|    |             |             |          |        |                                   |
|----|-------------|-------------|----------|--------|-----------------------------------|
| 46 | 62342.62459 | 160.4038981 | 3.638    | 0.0053 | HOMO->L+24 (16%)                  |
| 47 | 62424.89314 | 160.1925049 | -17.2921 | 0.015  | HOMO->L+24 (10%)                  |
| 48 | 62924.15033 | 158.9214943 | -7.4716  | 0.0016 | H-2->L+3 (10%), HOMO->L+27 (11%)  |
| 49 | 63013.67787 | 158.6957044 | -0.2801  | 0.0034 | H-10->LUMO (21%), H-6->LUMO (11%) |
| 50 | 63195.95918 | 158.2379654 | -27.66   | 0.0186 | H-1->L+10 (15%)                   |

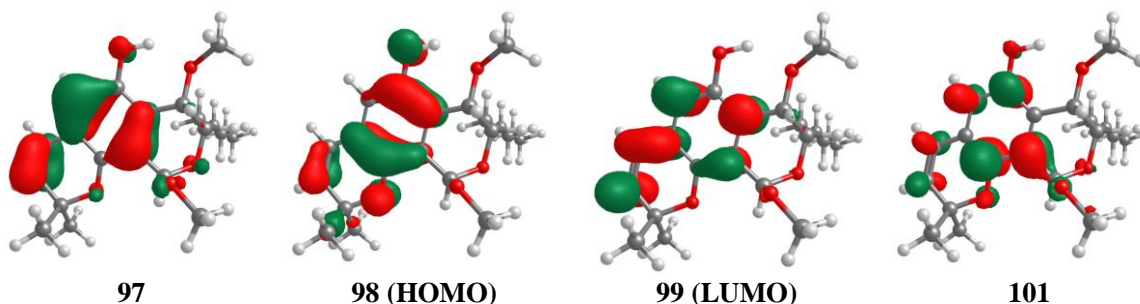

**Figure S12.** Key molecular orbitals involved in important transitions regarding the ECD spectrum of dominant conformer of **1**.

**Table S11.** Key transitions and their related rotatory and oscillator strengths of dominant conformer of **2** at the B3LYP/6-31+g(d) level.

| HOMO is 98 |                            |                 |           |               |                                                                     |
|------------|----------------------------|-----------------|-----------|---------------|---------------------------------------------------------------------|
| No.        | Energy (cm <sup>-1</sup> ) | Wavelength (nm) | R(length) | Osc. Strength | Major contri                                                        |
| 1          | 28998.05139                | 344.850758      | -6.3409   | 0.1401        | HOMO->LUMO (96%)                                                    |
| 2          | 36312.6935                 | 275.3857959     | 3.0223    | 0.0027        | H-1->LUMO (25%), HOMO->L+1 (70%)                                    |
| 3          | 39030.78193                | 256.2080365     | 1.7541    | 0.0083        | HOMO->L+2 (91%)                                                     |
| 4          | 39791.36275                | 251.3108199     | -20.6663  | 0.342         | H-2->LUMO (11%), H-1->LUMO (55%), HOMO->L+1 (19%)                   |
| 5          | 40877.79157                | 244.6316109     | -14.6935  | 0.0247        | HOMO->L+3 (81%)                                                     |
| 6          | 41905.34191                | 238.6330607     | 23.5118   | 0.1793        | H-2->LUMO (75%)                                                     |
| 7          | 42656.24409                | 234.4322669     | -1.8878   | 0.0028        | HOMO->L+4 (67%), HOMO->L+5 (17%)                                    |
| 8          | 42913.53495                | 233.0267132     | 1.5515    | 0.0054        | HOMO->L+4 (18%), HOMO->L+5 (74%)                                    |
| 9          | 44461.3129                 | 224.9146359     | 24.2761   | 0.0926        | H-1->L+1 (24%), HOMO->L+7 (45%), HOMO->L+8 (20%)                    |
| 10         | 45126.7203                 | 221.5982002     | -20.7371  | 0.0583        | H-1->L+1 (27%), HOMO->L+6 (11%), HOMO->L+8 (21%), HOMO->L+9 (23%)   |
| 11         | 45321.90647                | 220.6438515     | -8.0537   | 0.0799        | H-1->L+1 (32%), HOMO->L+6 (17%), HOMO->L+7 (26%)                    |
| 12         | 45502.57467                | 219.767784      | 2.5571    | 0.0094        | H-3->LUMO (97%)                                                     |
| 13         | 45982.47455                | 217.4741594     | 0.8334    | 0.0111        | HOMO->L+6 (20%), HOMO->L+7 (12%), HOMO->L+8 (36%), HOMO->L+9 (18%)  |
| 14         | 46392.2042                 | 215.5534571     | -0.9298   | 0.0423        | HOMO->L+6 (13%), HOMO->L+9 (35%), HOMO->L+10 (33%)                  |
| 15         | 47244.73223                | 211.6638094     | -3.7611   | 0.0391        | HOMO->L+6 (24%), HOMO->L+9 (13%), HOMO->L+10 (40%)                  |
| 16         | 47606.87517                | 210.0536942     | 3.0954    | 0.017         | H-4->LUMO (59%), HOMO->L+11 (23%)                                   |
| 17         | 47672.20608                | 209.7658326     | -8.3753   | 0.043         | H-4->LUMO (14%), H-1->L+2 (30%), HOMO->L+10 (13%), HOMO->L+11 (29%) |
| 18         | 47706.08137                | 209.6168814     | 3.5451    | 0.0338        | H-4->LUMO (17%), H-1->L+2 (56%), HOMO->L+11 (15%)                   |
| 19         | 48572.32082                | 205.878571      | 1.5578    | 0.0142        | HOMO->L+12 (83%)                                                    |
| 20         | 48679.59256                | 205.4248911     | -0.655    | 0.0053        | H-2->L+1 (89%)                                                      |
| 21         | 49446.62582                | 202.2382687     | 0.7726    | 0.0121        | H-1->L+3 (56%), HOMO->L+13 (17%)                                    |
| 22         | 49724.08055                | 201.1098021     | 0.8261    | 0.0319        | H-5->LUMO (77%)                                                     |

|    |             |             |          |        |                                                                                           |
|----|-------------|-------------|----------|--------|-------------------------------------------------------------------------------------------|
| 23 | 49836.19161 | 200.6573873 | 11.242   | 0.0178 | HOMO->L+13 (32%), HOMO->L+15 (17%), HOMO->L+16 (20%)                                      |
| 24 | 49894.26353 | 200.4238422 | 18.505   | 0.0242 | H-1->L+3 (19%), HOMO->L+13 (14%), HOMO->L+14 (39%)                                        |
| 25 | 50334.64225 | 198.6703303 | 3.7018   | 0.0633 | H-1->L+4 (10%), HOMO->L+15 (20%), HOMO->L+16 (42%)                                        |
| 26 | 50761.30954 | 197.0004338 | -8.1455  | 0.0167 | HOMO->L+13 (10%), HOMO->L+14 (38%), HOMO->L+15 (33%)                                      |
| 27 | 51000.85621 | 196.0751396 | 0.477    | 0.0084 | H-1->L+4 (38%), H-1->L+5 (21%), HOMO->L+16 (14%)                                          |
| 28 | 51194.42927 | 195.333753  | -1.49    | 0.0026 | H-7->LUMO (65%), H-6->LUMO (12%)                                                          |
| 29 | 51532.37558 | 194.0527656 | -10.671  | 0.0082 | H-1->L+4 (21%), H-1->L+5 (35%), HOMO->L+17 (27%)                                          |
| 30 | 51592.86716 | 193.8252427 | -0.3447  | 0.0014 | H-1->L+5 (25%), HOMO->L+17 (52%)                                                          |
| 31 | 51995.33782 | 192.3249356 | 2.6798   | 0.008  | H-3->L+1 (96%)                                                                            |
| 32 | 52187.29777 | 191.617509  | -10.2574 | 0.0148 | HOMO->L+19 (74%)                                                                          |
| 33 | 52497.82123 | 190.4840956 | 6.3065   | 0.0057 | HOMO->L+18 (60%), HOMO->L+20 (15%)                                                        |
| 34 | 52813.99057 | 189.3437684 | -3.5108  | 0.0014 | H-2->L+2 (49%), H-2->L+3 (31%)                                                            |
| 35 | 53034.17992 | 188.5576437 | 6.7687   | 0.0437 | H-1->L+7 (49%), H-1->L+8 (12%)                                                            |
| 36 | 53281.79213 | 187.6813748 | 14.5766  | 0.0166 | H-8->LUMO (11%), H-6->LUMO (15%), HOMO->L+18 (14%),<br>HOMO->L+20 (34%), HOMO->L+21 (10%) |
| 37 | 53313.24776 | 187.57064   | -2.2554  | 0.0007 | H-8->LUMO (22%), H-6->LUMO (32%), HOMO->L+20 (11%)                                        |
| 38 | 53672.97103 | 186.313517  | -0.2336  | 0.0001 | H-1->L+6 (24%), H-1->L+8 (29%), H-1->L+9 (13%)                                            |
| 39 | 54198.03797 | 184.5085242 | 8.9401   | 0.0076 | H-2->L+2 (25%), H-2->L+3 (42%)                                                            |
| 40 | 54288.37206 | 184.201508  | 2.8933   | 0.0046 | H-1->L+8 (15%), H-1->L+9 (18%), HOMO->L+21 (20%)                                          |
| 41 | 54462.58782 | 183.6122814 | -0.3165  | 0.0112 | H-1->L+8 (13%), H-1->L+9 (10%), HOMO->L+21 (35%)                                          |
| 42 | 54732.78355 | 182.7058547 | -1.7545  | 0.0169 | H-1->L+6 (10%), H-1->L+9 (13%), H-1->L+10 (30%), H-1->L+11 (11%)                          |
| 43 | 54969.91055 | 181.9177055 | 24.5997  | 0.0518 | H-4->L+1 (23%), HOMO->L+23 (44%), HOMO->L+25 (13%)                                        |
| 44 | 55057.82499 | 181.6272256 | -5.1399  | 0.0052 | H-8->LUMO (38%), H-6->LUMO (24%)                                                          |
| 45 | 55178.80815 | 181.228996  | -9.7907  | 0.059  | H-4->L+1 (36%), HOMO->L+22 (12%), HOMO->L+23 (27%)                                        |
| 46 | 55217.52276 | 181.101931  | 4.4159   | 0.0129 | HOMO->L+20 (10%), HOMO->L+22 (58%)                                                        |
| 47 | 55532.88555 | 180.0734808 | -11.5014 | 0.0239 | H-10->LUMO (12%), H-1->L+6 (14%), H-1->L+9 (11%), H-1->L+11 (13%)                         |
| 48 | 55724.03895 | 179.4557643 | 12.8988  | 0.0057 | H-3->L+2 (28%), H-2->L+4 (14%), H-2->L+5 (20%)                                            |
| 49 | 55838.56967 | 179.0876818 | -1.3228  | 0.0094 | H-3->L+2 (17%), HOMO->L+25 (31%)                                                          |
| 50 | 55882.93017 | 178.94552   | 2.0251   | 0.0054 | H-3->L+2 (30%), H-2->L+5 (12%), HOMO->L+25 (14%)                                          |

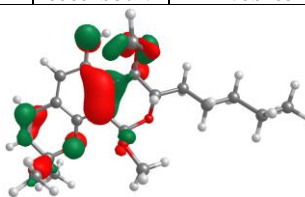

94

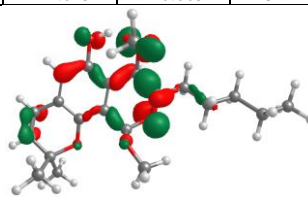

96

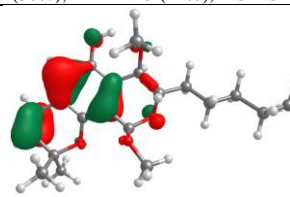

97

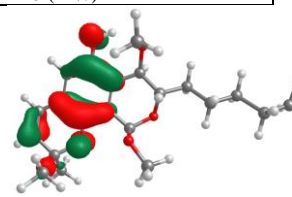

98 (HOMO)

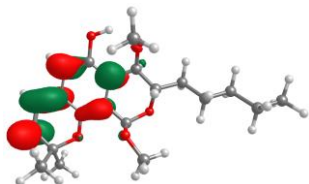

99 (LUMO)

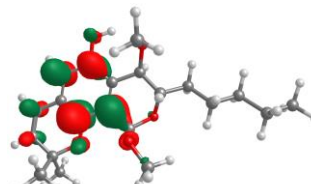

100

**Figure S13.** Key molecular orbitals involved in important transitions regarding the ECD spectrum of dominant conformer of **2**.**Table S12.** Key transitions and their related rotatory and oscillator strengths of dominant conformer of **3** at the B3LYP/6-31+g(d) level.

| HOMO is 110 |                            |                 |           |               |                                                                    |
|-------------|----------------------------|-----------------|-----------|---------------|--------------------------------------------------------------------|
| No.         | Energy (cm <sup>-1</sup> ) | Wavelength (nm) | R(length) | Osc. Strength | Major contris                                                      |
| 1           | 33272.78986                | 300.5458828     | -16.4898  | 0.2792        | HOMO->LUMO (91%)                                                   |
| 2           | 38708.16016                | 258.3434594     | -18.4822  | 0.056         | H-1->LUMO (29%), HOMO->L+2 (44%), HOMO->L+3 (13%)                  |
| 3           | 42405.40566                | 235.8189916     | -2.4042   | 0.0026        | HOMO->L+1 (70%)                                                    |
| 4           | 43930.60008                | 227.6317642     | 32.0094   | 0.383         | H-1->LUMO (62%), HOMO->L+2 (24%)                                   |
| 5           | 45885.68802                | 217.9328769     | 8.2457    | 0.0312        | H-1->L+1 (10%), HOMO->L+4 (58%)                                    |
| 6           | 47026.15598                | 212.6476169     | 22.9836   | 0.3549        | H-1->L+2 (42%), H-1->L+3 (15%), HOMO->L+5 (11%)                    |
| 7           | 47327.80734                | 211.2922732     | -3.4325   | 0.1507        | H-1->L+2 (20%), HOMO->L+3 (16%), HOMO->L+5 (27%)                   |
| 8           | 48009.34583                | 208.2927777     | -15.7391  | 0.0495        | HOMO->L+3 (24%), HOMO->L+5 (23%), HOMO->L+6 (11%), HOMO->L+8 (12%) |
| 9           | 49508.73052                | 201.9845772     | 2.4804    | 0.0029        | H-1->L+1 (20%), HOMO->L+6 (10%), HOMO->L+7 (26%)                   |
| 10          | 50208.01321                | 199.1713944     | -14.3541  | 0.0078        | H-1->L+1 (17%), HOMO->L+3 (14%)                                    |
| 11          | 50382.22896                | 198.4826834     | 2.0831    | 0.0022        | HOMO->L+10 (16%), HOMO->L+11 (15%)                                 |
| 12          | 51425.91039                | 194.454506      | 7.9184    | 0.0143        | H-2->LUMO (68%)                                                    |
| 13          | 51936.45935                | 192.5429674     | -7.6382   | 0.0029        | HOMO->L+8 (10%), HOMO->L+9 (24%), HOMO->L+10 (23%)                 |
| 14          | 52736.56134                | 189.621768      | -21.4953  | 0.042         | H-1->L+5 (17%), HOMO->L+13 (28%)                                   |
| 15          | 53210.81534                | 187.9317191     | 6.1381    | 0.1379        | HOMO->L+16 (29%)                                                   |
| 16          | 53387.45076                | 187.3099363     | 7.6787    | 0.0203        | HOMO->L+10 (15%), HOMO->L+11 (25%)                                 |
| 17          | 53959.29785                | 185.3248726     | 7.6281    | 0.0109        | H-3->LUMO (42%)                                                    |
| 18          | 54215.78216                | 184.4481367     | -13.5517  | 0.0374        | H-3->LUMO (33%)                                                    |
| 19          | 54485.17134                | 183.5361761     | 7.1092    | 0.0098        | H-1->L+4 (17%), H-1->L+13 (10%)                                    |
| 20          | 54856.99293                | 182.2921649     | 7.0229    | 0.0044        | H-1->L+4 (31%), HOMO->L+13 (11%)                                   |
| 21          | 55501.42992                | 180.1755381     | 19.6245   | 0.0166        | H-1->L+5 (14%), HOMO->L+12 (11%), HOMO->L+14 (10%)                 |
| 22          | 55805.50094                | 179.193804      | -4.3462   | 0.0456        | H-4->LUMO (57%), HOMO->L+12 (11%)                                  |
| 23          | 55936.96931                | 178.7726458     | -14.3298  | 0.0053        | HOMO->L+13 (13%), HOMO->L+17 (12%), HOMO->L+18 (13%)               |
| 24          | 56285.40083                | 177.6659641     | -7.9894   | 0.0073        | H-4->LUMO (10%), H-1->L+3 (17%), HOMO->L+14 (10%)                  |
| 25          | 56629.79957                | 176.585474      | 0.1192    | 0.0034        | HOMO->L+19 (10%), HOMO->L+20 (17%), HOMO->L+23 (18%)               |
| 26          | 57036.303                  | 175.3269317     | 1.8813    | 0.0112        |                                                                    |
| 27          | 57413.77047                | 174.1742428     | 4.6854    | 0.0065        | HOMO->L+12 (10%), HOMO->L+14 (14%), HOMO->L+15 (17%)               |
| 28          | 57614.60253                | 173.5671091     | -29.7819  | 0.0492        | H-2->L+3 (11%)                                                     |
| 29          | 57792.0445                 | 173.0341968     | 19.6693   | 0.0296        | H-2->L+2 (26%)                                                     |
| 30          | 57892.05725                | 172.7352676     | 3.0617    | 0.0061        | H-5->LUMO (14%), HOMO->L+6 (11%), HOMO->L+18 (15%)                 |
| 31          | 57994.48966                | 172.430175      | 8.3687    | 0.0513        | H-5->LUMO (37%)                                                    |
| 32          | 58079.98443                | 172.1763547     | -0.6829   | 0.0049        | HOMO->L+22 (23%)                                                   |
| 33          | 58519.5566                 | 170.8830446     | -10.0789  | 0.0127        | HOMO->L+6 (10%), HOMO->L+7 (14%)                                   |

|    |             |             |          |        |                                                      |
|----|-------------|-------------|----------|--------|------------------------------------------------------|
| 34 | 58684.0937  | 170.4039267 | 12.7206  | 0.0142 | H-2->L+1 (15%)                                       |
| 35 | 59006.71547 | 169.4722358 | -4.1209  | 0.0088 | H-7->LUMO (16%)                                      |
| 36 | 59151.89527 | 169.0562907 | -4.63    | 0.0027 |                                                      |
| 37 | 59389.02227 | 168.3812869 | -1.3606  | 0.0179 | HOMO->L+20 (11%), HOMO->L+23 (12%)                   |
| 38 | 59497.90712 | 168.0731388 | -0.6572  | 0.0097 |                                                      |
| 39 | 59709.22438 | 167.4783102 | 20.5784  | 0.013  |                                                      |
| 40 | 60028.61993 | 166.5872048 | 7.1102   | 0.0051 | H-1->L+10 (10%)                                      |
| 41 | 60220.57989 | 166.0561891 | 7.0263   | 0.0081 | HOMO->L+25 (15%), HOMO->L+26 (12%)                   |
| 42 | 60589.17526 | 165.0459832 | -3.5612  | 0.0058 | HOMO->L+21 (11%), HOMO->L+22 (15%), HOMO->L+24 (23%) |
| 43 | 60759.35825 | 164.5837002 | -2.2869  | 0.0018 | H-1->L+10 (13%)                                      |
| 44 | 60897.27905 | 164.2109493 | -9.8554  | 0.0219 | H-3->L+2 (24%)                                       |
| 45 | 61045.68507 | 163.8117418 | -0.109   | 0.0107 | H-1->L+11 (17%)                                      |
| 46 | 61150.53714 | 163.5308612 | 21.7785  | 0.0214 | H-8->LUMO (40%)                                      |
| 47 | 61236.83847 | 163.3003965 | 1.538    | 0.0015 |                                                      |
| 48 | 61439.28363 | 162.7623144 | -19.0445 | 0.0134 |                                                      |
| 49 | 61982.90131 | 161.3348163 | 13.5891  | 0.0039 | HOMO->L+27 (15%)                                     |
| 50 | 62172.44161 | 160.8429674 | -0.2288  | 0.0219 |                                                      |

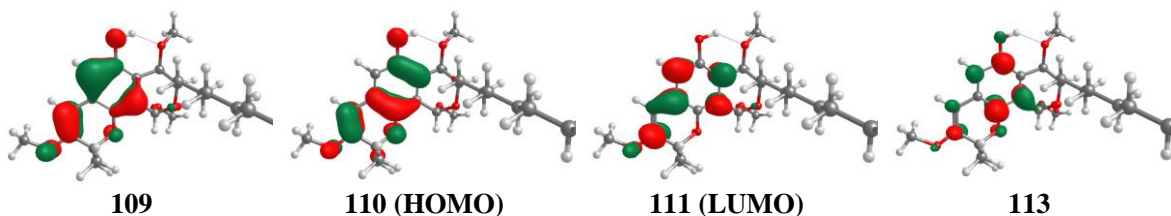

**Figure S14.** Key molecular orbitals involved in important transitions regarding the ECD spectrum of dominant conformer of **3**.

**Table S13.** Key transitions and their related rotatory and oscillator strengths of dominant conformer of **4** at the B3LYP/6-31+g(d) level.

| HOMO is 111 |               |                 |           |               |                                                                                     |
|-------------|---------------|-----------------|-----------|---------------|-------------------------------------------------------------------------------------|
| No.         | Energy (cm-1) | Wavelength (nm) | R(length) | Osc. Strength | Major contribs                                                                      |
| 1           | 35936.83914   | 278.2659867     | -8.3259   | 0.1626        | HOMO->LUMO (89%)                                                                    |
| 2           | 43905.5969    | 227.7613951     | 14.2247   | 0.0472        | H-1->LUMO (17%), HOMO->L+1 (10%), HOMO->L+2 (28%), HOMO->L+5 (16%), HOMO->L+6 (10%) |
| 3           | 44522.61104   | 224.6049764     | 5.6483    | 0.0064        | HOMO->L+1 (60%), HOMO->L+3 (12%)                                                    |
| 4           | 48460.20976   | 206.3548641     | -11.8262  | 0.0654        | H-1->LUMO (23%), HOMO->L+2 (38%)                                                    |
| 5           | 49934.59125   | 200.2619777     | 34.0402   | 0.231         | H-1->LUMO (16%), HOMO->L+4 (27%), HOMO->L+10 (15%)                                  |
| 6           | 50129.77743   | 199.4822342     | 38.9163   | 0.2521        | H-1->LUMO (33%), HOMO->L+3 (22%), HOMO->L+4 (13%), HOMO->L+6 (12%)                  |
| 7           | 50416.9108    | 198.346147      | -11.8505  | 0.0417        | H-2->LUMO (87%)                                                                     |
| 8           | 50837.12566   | 196.7066365     | -31.8741  | 0.1124        | HOMO->L+3 (11%), HOMO->L+5 (27%), HOMO->L+6 (14%), HOMO->L+8 (11%)                  |
| 9           | 52849.47896   | 189.2166242     | -58.2449  | 0.1649        | HOMO->L+5 (14%), HOMO->L+10 (11%), HOMO->L+11 (16%)                                 |
| 10          | 53653.61373   | 186.3807357     | 112.4306  | 0.424         | H-1->L+2 (17%), H-1->L+5 (14%), H-1->L+6 (10%)                                      |
| 11          | 54528.72528   | 183.3895795     | -3.1878   | 0.0093        | H-1->L+1 (15%), HOMO->L+3 (14%), HOMO->L+6 (13%), HOMO->L+7 (10%), HOMO->L+9 (12%)  |



|    |             |             |          |        |                                                                      |
|----|-------------|-------------|----------|--------|----------------------------------------------------------------------|
| 12 | 54702.94104 | 182.8055276 | -0.5642  | 0.0107 | HOMO->L+8 (18%), HOMO->L+9 (28%), HOMO->L+11 (13%), HOMO->L+15 (10%) |
| 13 | 54944.90737 | 182.0004888 | -1.1515  | 0.0031 | H-1->L+1 (38%), HOMO->L+6 (10%)                                      |
| 14 | 55753.88146 | 179.3597098 | 10.8271  | 0.0141 | HOMO->L+13 (35%)                                                     |
| 15 | 55960.35939 | 178.6979231 | 0.4908   | 0.0123 | HOMO->L+5 (10%), HOMO->L+8 (18%), HOMO->L+9 (16%)                    |
| 16 | 56132.15549 | 178.1510066 | 13.4627  | 0.0128 | H-3->LUMO (62%)                                                      |
| 17 | 56473.32801 | 177.0747422 | 9.3418   | 0.0077 | H-3->LUMO (16%), H-2->L+1 (21%), H-2->L+2 (27%)                      |
| 18 | 56704.00258 | 176.3543938 | -6.7402  | 0.0068 | H-4->LUMO (76%)                                                      |
| 19 | 57574.27481 | 173.6886836 | 8.5868   | 0.0089 | H-3->L+1 (16%), H-3->L+2 (16%), H-3->L+3 (10%), H-3->L+5 (16%)       |
| 20 | 57700.90385 | 173.3075105 | -6.4239  | 0.0024 | H-5->LUMO (17%), HOMO->L+12 (16%)                                    |
| 21 | 58031.59117 | 172.3199347 | -7.6224  | 0.0035 | H-5->LUMO (26%)                                                      |
| 22 | 58253.39363 | 171.6638186 | 2.2957   | 0.0022 | H-5->LUMO (21%), HOMO->L+13 (15%), HOMO->L+15 (10%)                  |
| 23 | 58818.78829 | 170.0137029 | -2.7985  | 0.0015 | HOMO->L+12 (29%), HOMO->L+14 (10%)                                   |
| 24 | 58935.73868 | 169.6763326 | 0.3677   | 0.0025 | H-2->L+1 (35%), H-2->L+5 (22%)                                       |
| 25 | 59347.08144 | 168.5002827 | 1.7368   | 0.0022 | HOMO->L+15 (14%), HOMO->L+16 (16%)                                   |
| 26 | 59895.53845 | 166.9573437 | -6.2869  | 0.0039 | H-7->LUMO (15%), H-1->L+5 (11%)                                      |
| 27 | 60031.0396  | 166.5804901 | 7.5711   | 0.0121 | H-7->LUMO (12%), H-1->L+3 (11%)                                      |
| 28 | 60074.59354 | 166.4597197 | 8.086    | 0.0029 | H-7->LUMO (12%)                                                      |
| 29 | 60181.05872 | 166.1652389 | -6.1401  | 0.0066 | H-1->L+2 (20%), H-1->L+4 (14%)                                       |
| 30 | 60692.41423 | 164.7652368 | -16.6135 | 0.0056 | H-7->LUMO (11%), H-2->L+3 (23%)                                      |
| 31 | 60861.79066 | 164.3067003 | 19.2151  | 0.0213 | HOMO->L+7 (19%), HOMO->L+15 (14%)                                    |
| 32 | 61107.78976 | 163.6452577 | -5.1219  | 0.0112 | HOMO->L+17 (19%), HOMO->L+22 (10%)                                   |
| 33 | 61148.11748 | 163.5373322 | -0.0455  | 0.0159 | H-4->L+1 (11%), H-1->L+2 (11%), H-1->L+4 (19%)                       |
| 34 | 61250.54989 | 163.2638404 | -8.3856  | 0.0166 | H-8->LUMO (40%)                                                      |
| 35 | 61623.98459 | 162.2744791 | 3.3612   | 0.0011 | HOMO->L+7 (32%), HOMO->L+17 (12%), HOMO->L+22 (12%)                  |
| 36 | 61710.28592 | 162.0475396 | -16.1249 | 0.0073 | H-8->LUMO (11%), H-4->L+1 (12%)                                      |
| 37 | 61838.52807 | 161.7114817 | -4.0523  | 0.0118 | H-3->L+6 (15%)                                                       |
| 38 | 62338.59182 | 160.4142748 | -10.1782 | 0.0025 | H-2->L+4 (12%)                                                       |
| 39 | 62480.5454  | 160.0498193 | 11.2909  | 0.0044 | H-2->L+4 (15%)                                                       |
| 40 | 62690.24955 | 159.5144392 | 16.7641  | 0.0075 | H-3->L+2 (10%), H-3->L+5 (16%), H-3->L+8 (14%)                       |
| 41 | 62801.55406 | 159.2317284 | -2.6203  | 0.0065 | HOMO->L+15 (12%), HOMO->L+21 (15%), HOMO->L+24 (14%)                 |
| 42 | 63232.25412 | 158.1471377 | 3.6241   | 0.0013 |                                                                      |
| 43 | 63477.44667 | 157.5362672 | -8.4756  | 0.0044 |                                                                      |
| 44 | 63591.9774  | 157.2525405 | 2.2774   | 0.0076 | HOMO->L+19 (26%)                                                     |
| 45 | 63724.25233 | 156.9261252 | 7.5253   | 0.0023 | H-3->L+4 (10%), H-3->L+5 (17%), H-3->L+6 (10%)                       |
| 46 | 63843.62238 | 156.6327164 | -18.5813 | 0.0162 |                                                                      |
| 47 | 64123.49677 | 155.9490749 | -2.0665  | 0.0051 |                                                                      |
| 48 | 64159.79172 | 155.8608551 | -4.2188  | 0.0014 |                                                                      |
| 49 | 64370.30242 | 155.3511421 | -10.1489 | 0.0099 | H-3->L+1 (10%), H-3->L+12 (14%)                                      |
| 50 | 64471.12173 | 155.1082055 | -9.0334  | 0.0092 | H-4->L+3 (16%)                                                       |

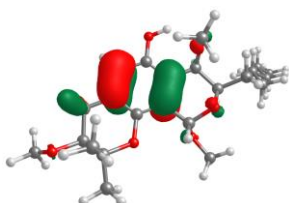

110

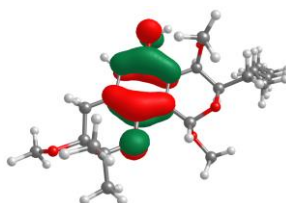

111 (HOMO)

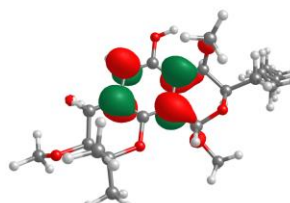

112 (LUMO)

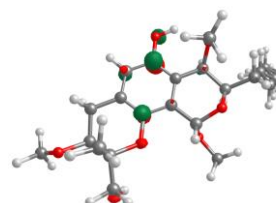

114

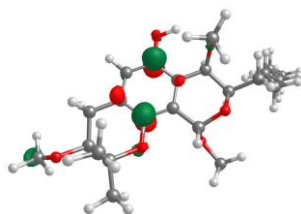

117

**Figure S15.** Key molecular orbitals involved in important transitions regarding the ECD spectrum of dominant conformer of **4**.

**Table S14.** Key transitions and their related rotatory and oscillator strengths of dominant conformer of **5** at the B3LYP/6-31+g(d) level.

| HOMO is 103 |                            |                 |           |               |                                                                     |
|-------------|----------------------------|-----------------|-----------|---------------|---------------------------------------------------------------------|
| No.         | Energy (cm <sup>-1</sup> ) | Wavelength (nm) | R(length) | Osc. Strength | Major contribs                                                      |
| 1           | 35936.83914                | 278.2659867     | -7.7812   | 0.1582        | HOMO->LUMO (89%)                                                    |
| 2           | 43928.18042                | 227.6443027     | 12.5697   | 0.0457        | H-1->LUMO (17%), HOMO->L+1 (11%), HOMO->L+2 (32%), HOMO->L+5 (22%)  |
| 3           | 44658.11218                | 223.9234825     | 7.2011    | 0.0074        | HOMO->L+1 (59%), HOMO->L+5 (21%)                                    |
| 4           | 48477.95396                | 206.2793329     | -16.3485  | 0.06          | H-1->LUMO (22%), HOMO->L+2 (38%)                                    |
| 5           | 49988.6304                 | 200.0454887     | 43.106    | 0.3232        | H-1->LUMO (27%), HOMO->L+3 (14%), HOMO->L+5 (12%), HOMO->L+10 (19%) |
| 6           | 50162.0396                 | 199.3539354     | 6.4831    | 0.0209        | H-2->LUMO (61%)                                                     |
| 7           | 50216.8853                 | 199.1362057     | 3.3825    | 0.2125        | H-2->LUMO (27%), H-1->LUMO (22%), HOMO->L+3 (15%)                   |
| 8           | 50940.36463                | 196.3079784     | -30.9938  | 0.0659        | HOMO->L+4 (40%), HOMO->L+8 (30%)                                    |
| 9           | 52526.05063                | 190.3817226     | -46.2897  | 0.0861        | HOMO->L+2 (12%), HOMO->L+5 (21%), HOMO->L+10 (17%)                  |
| 10          | 53603.60735                | 186.5546088     | 57.9395   | 0.4155        | H-1->L+2 (18%), H-1->L+5 (26%), HOMO->L+8 (15%)                     |
| 11          | 53841.54091                | 185.730197      | 41.0632   | 0.0956        | HOMO->L+6 (16%), HOMO->L+7 (11%), HOMO->L+8 (11%), HOMO->L+10 (15%) |
| 12          | 54530.33839                | 183.3841545     | 0.0755    | 0.0041        | HOMO->L+3 (19%), HOMO->L+6 (10%), HOMO->L+7 (15%), HOMO->L+11 (14%) |
| 13          | 55141.70665                | 181.3509339     | -0.0956   | 0.0027        | H-1->L+1 (53%)                                                      |
| 14          | 55605.47544                | 179.8384048     | -5.1732   | 0.0238        | HOMO->L+9 (10%), HOMO->L+12 (43%)                                   |
| 15          | 56168.45044                | 178.0358889     | 11.1134   | 0.0094        | H-2->L+1 (19%), H-2->L+2 (35%)                                      |
| 16          | 56514.46229                | 176.9458577     | 2.2486    | 0.0132        | H-4->LUMO (29%), H-3->LUMO (18%), HOMO->L+9 (15%)                   |
| 17          | 56631.41268                | 176.5804441     | 2.3289    | 0.003         | H-4->LUMO (25%), H-3->LUMO (10%), HOMO->L+9 (15%)                   |
| 18          | 57283.10866                | 174.5715314     | 9.7993    | 0.0046        | H-5->LUMO (12%), H-4->LUMO (14%), H-3->LUMO (40%)                   |
| 19          | 57849.30987                | 172.8629092     | 1.4311    | 0.0059        | HOMO->L+11 (20%)                                                    |
| 20          | 58433.25527                | 171.1354254     | 2.4614    | 0.0005        | H-5->LUMO (28%)                                                     |
| 21          | 58565.5302                 | 170.7489024     | -3.8247   | 0.0034        | H-5->LUMO (17%), HOMO->L+14 (19%)                                   |
| 22          | 58693.77235                | 170.3758269     | 4.7343    | 0.0151        | H-3->L+1 (11%), H-3->L+2 (14%)                                      |
| 23          | 59037.36454                | 169.3842548     | -6.1932   | 0.0071        | H-2->L+1 (20%), H-2->L+5 (37%)                                      |
| 24          | 59350.30766                | 168.4911232     | -0.9004   | 0.0033        | HOMO->L+13 (12%), HOMO->L+15 (10%), HOMO->L+18 (14%)                |
| 25          | 59807.62402                | 167.2027633     | 8.9339    | 0.0183        | HOMO->L+15 (35%)                                                    |
| 26          | 60098.79017                | 166.3927006     | -0.2522   | 0.0099        | H-1->L+2 (22%), H-1->L+3 (16%), H-1->L+8 (24%)                      |
| 27          | 60214.12745                | 166.0739834     | 12.3347   | 0.0041        | H-2->L+4 (11%), H-1->L+4 (27%)                                      |
| 28          | 60373.82523                | 165.6346929     | -0.7762   | 0.0157        | H-6->LUMO (15%), HOMO->L+15 (14%), HOMO->L+17 (13%)                 |
| 29          | 60531.10334                | 165.2043239     | 9.1153    | 0.0143        | H-2->L+4 (10%), HOMO->L+17 (15%)                                    |

|    |             |             |          |        |                                                                      |
|----|-------------|-------------|----------|--------|----------------------------------------------------------------------|
| 30 | 60894.85939 | 164.2174742 | -1.9151  | 0.0022 | H-6->LUMO (17%), H-2->L+4 (12%), HOMO->L+17 (11%)                    |
| 31 | 61040.03919 | 163.8268935 | 0.0648   | 0.0015 | HOMO->L+11 (10%), HOMO->L+20 (10%), HOMO->L+21 (21%)                 |
| 32 | 61238.45158 | 163.2960949 | -18.7976 | 0.0333 | H-1->L+3 (15%)                                                       |
| 33 | 61533.6505  | 162.5127051 | -1.8456  | 0.0021 | HOMO->L+6 (13%), HOMO->L+7 (12%), HOMO->L+14 (12%), HOMO->L+19 (17%) |
| 34 | 61550.58814 | 162.4679845 | -8.5989  | 0.0179 | H-8->LUMO (24%)                                                      |
| 35 | 61891.76066 | 161.572395  | -0.8475  | 0.0017 | H-8->LUMO (10%), H-2->L+3 (10%)                                      |
| 36 | 62174.05471 | 160.8387943 | 4.0567   | 0.0075 | HOMO->L+6 (10%)                                                      |
| 37 | 62251.48394 | 160.6387409 | -5.7522  | 0.0042 | H-2->L+3 (20%)                                                       |
| 38 | 62742.67559 | 159.3811534 | 24.6967  | 0.0057 | HOMO->L+20 (13%), HOMO->L+26 (11%)                                   |
| 39 | 63147.56591 | 158.3592314 | -2.4795  | 0.0093 | H-1->L+5 (11%)                                                       |
| 40 | 63289.51949 | 158.0040437 | -11.7542 | 0.0114 | H-1->L+5 (15%)                                                       |
| 41 | 63669.40663 | 157.0613035 | -5.7599  | 0.0007 | HOMO->L+22 (11%), HOMO->L+23 (11%)                                   |
| 42 | 64012.19226 | 156.2202394 | -2.0966  | 0.0071 | HOMO->L+24 (10%)                                                     |
| 43 | 64154.14584 | 155.8745716 | -15.5733 | 0.0073 |                                                                      |
| 44 | 64188.82768 | 155.7903511 | -18.6523 | 0.0091 | H-2->L+9 (17%)                                                       |
| 45 | 64317.87639 | 155.4777701 | -0.0047  | 0.0005 | H-10->LUMO (17%)                                                     |
| 46 | 64562.26238 | 154.8892438 | -4.8762  | 0.0024 | H-1->L+3 (11%)                                                       |
| 47 | 64672.76033 | 154.6246047 | -2.8157  | 0.0035 | HOMO->L+16 (12%)                                                     |
| 48 | 64863.10718 | 154.1708443 | 8.2131   | 0.0074 | H-10->LUMO (12%)                                                     |
| 49 | 64960.70027 | 153.9392272 | -7.2255  | 0.0135 |                                                                      |
| 50 | 65047.00159 | 153.7349879 | 7.2162   | 0.0015 |                                                                      |

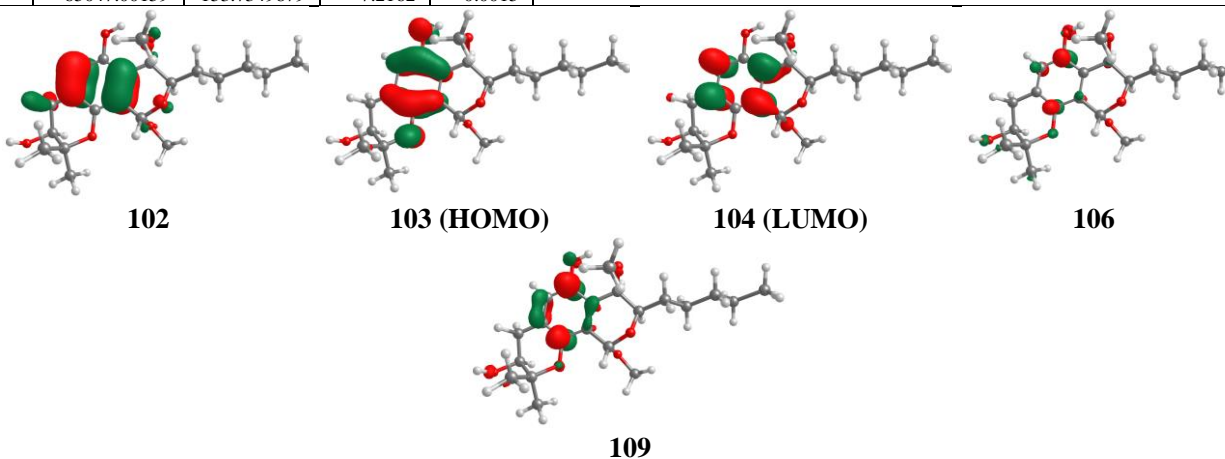

**Figure S16.** Key molecular orbitals involved in important transitions regarding the ECD spectrum of dominant conformer of **5**.

**Table S15.** Key transitions and their related rotatory and oscillator strengths of dominant conformer of **6** at the B3LYP/6-31+g(d) level.

| HOMO is 107 |                            |                 |           |               |                                                                                     |
|-------------|----------------------------|-----------------|-----------|---------------|-------------------------------------------------------------------------------------|
| No.         | Energy (cm <sup>-1</sup> ) | Wavelength (nm) | R(length) | Osc. Strength | Major contribs                                                                      |
| 1           | 36093.3107                 | 277.0596492     | -7.351    | 0.1434        | HOMO->LUMO (88%)                                                                    |
| 2           | 43666.05023                | 229.0108665     | 13.5984   | 0.0582        | H-1->LUMO (15%), HOMO->L+1 (29%), HOMO->L+2 (16%), HOMO->L+3 (15%), HOMO->L+4 (12%) |

|    |             |             |          |        |                                                                    |
|----|-------------|-------------|----------|--------|--------------------------------------------------------------------|
| 3  | 45501.76811 | 219.7716795 | 3.6619   | 0.0065 | HOMO->L+1 (41%), HOMO->L+2 (11%), HOMO->L+4 (30%)                  |
| 4  | 48339.22659 | 206.871328  | -12.0884 | 0.024  | HOMO->L+2 (42%), HOMO->L+4 (10%), HOMO->L+5 (16%)                  |
| 5  | 49378.87525 | 202.5157509 | 19.3289  | 0.0678 | H-2->LUMO (65%), H-1->LUMO (15%)                                   |
| 6  | 49907.97496 | 200.3687789 | -47.4991 | 0.5634 | H-2->LUMO (21%), H-1->LUMO (52%), HOMO->L+4 (12%)                  |
| 7  | 51029.89217 | 195.963573  | 11.8641  | 0.0301 | HOMO->L+3 (24%), HOMO->L+5 (21%)                                   |
| 8  | 52190.52399 | 191.6056639 | 8.6503   | 0.015  | HOMO->L+3 (21%), HOMO->L+6 (24%), HOMO->L+7 (17%), HOMO->L+8 (10%) |
| 9  | 52776.08251 | 189.4797705 | -6.7375  | 0.423  | H-1->L+1 (19%), H-1->L+2 (12%), H-1->L+3 (17%), H-1->L+4 (16%)     |
| 10 | 54330.31289 | 184.0593118 | -12.4997 | 0.0489 | H-4->LUMO (41%), H-3->LUMO (11%)                                   |
| 11 | 54437.58463 | 183.6966145 | 28.8304  | 0.0383 | H-4->LUMO (13%), HOMO->L+9 (21%)                                   |
| 12 | 55449.00388 | 180.3458908 | 21.2489  | 0.0512 | HOMO->L+7 (11%), HOMO->L+8 (32%), HOMO->L+9 (13%)                  |
| 13 | 55686.93744 | 179.575327  | 1.809    | 0.0022 | H-1->L+1 (13%), HOMO->L+6 (13%), HOMO->L+7 (21%), HOMO->L+11 (13%) |
| 14 | 55827.27791 | 179.1239046 | 15.3314  | 0.0095 | H-2->L+1 (24%), H-2->L+2 (29%)                                     |
| 15 | 56064.40491 | 178.3662917 | -11.569  | 0.0349 | H-4->LUMO (10%), H-3->LUMO (58%)                                   |
| 16 | 56116.83095 | 178.1996565 | 11.2282  | 0.0055 | H-1->L+1 (27%), H-1->L+4 (11%)                                     |
| 17 | 56712.06812 | 176.3293128 | 6.343    | 0.0049 | HOMO->L+5 (14%), HOMO->L+10 (25%), HOMO->L+12 (21%)                |
| 18 | 57424.25568 | 174.14244   | 6.9337   | 0.004  | HOMO->L+10 (12%), HOMO->L+12 (43%)                                 |
| 19 | 57931.57842 | 172.6174269 | -3.2483  | 0.0163 | H-6->LUMO (52%)                                                    |
| 20 | 58682.48059 | 170.4086109 | -4.4788  | 0.0007 | H-5->LUMO (15%), H-2->L+1 (14%), H-2->L+4 (21%)                    |
| 21 | 58924.44692 | 169.7088479 | -30.7107 | 0.0201 | H-6->LUMO (10%), H-5->LUMO (26%), H-2->L+4 (22%)                   |
| 22 | 59062.36773 | 169.3125485 | 2.3256   | 0.0047 | HOMO->L+15 (20%)                                                   |
| 23 | 59079.30537 | 169.2640077 | 4.5674   | 0.0152 | H-5->LUMO (16%), H-4->L+1 (12%)                                    |
| 24 | 59634.21482 | 167.688969  | 0.3158   | 0.0006 | HOMO->L+7 (17%), HOMO->L+8 (12%), HOMO->L+14 (27%)                 |
| 25 | 60095.56395 | 166.4016334 | 3.8255   | 0.0041 | H-8->LUMO (22%), H-1->L+2 (16%), H-1->L+5 (14%)                    |
| 26 | 60439.96269 | 165.4534443 | -19.3604 | 0.0057 |                                                                    |
| 27 | 60619.82433 | 164.9625368 | -4.4013  | 0.0149 | H-2->L+5 (11%)                                                     |
| 28 | 60755.32547 | 164.5946248 | 10.7642  | 0.0043 |                                                                    |
| 29 | 61065.84893 | 163.7576514 | 3.4909   | 0.0021 | H-8->LUMO (21%)                                                    |
| 30 | 61156.98958 | 163.5136077 | -22.1207 | 0.0109 |                                                                    |
| 31 | 61403.79523 | 162.8563831 | -1.4047  | 0.007  | H-3->L+1 (19%), H-3->L+3 (12%)                                     |
| 32 | 61759.48574 | 161.9184467 | -7.4976  | 0.0134 | HOMO->L+13 (11%), HOMO->L+15 (18%)                                 |
| 33 | 61868.37059 | 161.6334794 | 29.6881  | 0.043  |                                                                    |
| 34 | 61907.0852  | 161.5323992 | -7.7345  | 0.0036 |                                                                    |
| 35 | 62146.63186 | 160.9097661 | -8.1571  | 0.0084 | H-2->L+3 (24%)                                                     |
| 36 | 62507.96825 | 159.9796039 | 3.5892   | 0.0052 | HOMO->L+13 (10%), HOMO->L+16 (13%)                                 |
| 37 | 62755.58046 | 159.3483787 | -11.8954 | 0.0054 | HOMO->L+16 (12%), HOMO->L+20 (12%)                                 |
| 38 | 62853.17354 | 159.100956  | -2.7735  | 0.0046 | HOMO->L+18 (33%)                                                   |
| 39 | 63167.72977 | 158.3086813 | 8.6829   | 0.0105 | HOMO->L+16 (15%)                                                   |
| 40 | 63282.2605  | 158.022168  | -4.918   | 0.0083 | H-2->L+5 (11%)                                                     |

|    |             |             |          |        |                                                |
|----|-------------|-------------|----------|--------|------------------------------------------------|
| 41 | 63460.50903 | 157.5783137 | -10.3014 | 0.0118 | HOMO->L+19 (10%), HOMO->L+21 (20%)             |
| 42 | 63578.26597 | 157.2864539 | 25.7283  | 0.024  | H-12->LUMO (14%)                               |
| 43 | 63753.28829 | 156.8546544 | 14.2632  | 0.0123 | H-3->L+2 (15%), H-3->L+3 (15%), H-3->L+4 (19%) |
| 44 | 64260.61102 | 155.616323  | 4.2917   | 0.0076 | H-3->L+5 (11%), H-1->L+7 (13%), H-1->L+9 (11%) |
| 45 | 64620.3343  | 154.7500506 | 1.1      | 0.0014 | H-6->L+4 (11%)                                 |
| 46 | 64855.84819 | 154.1880999 | -13.2859 | 0.0049 |                                                |
| 47 | 65097.81452 | 153.6149881 | 19.6734  | 0.0208 |                                                |
| 48 | 65305.90556 | 153.1255085 | -0.3546  | 0.0059 | HOMO->L+11 (11%), HOMO->L+17 (17%)             |
| 49 | 65434.14772 | 152.8254031 | -0.8763  | 0.0043 | H-1->L+9 (10%)                                 |
| 50 | 65564.80953 | 152.5208427 | 0.5528   | 0.0024 | H-5->L+1 (10%), H-5->L+2 (16%)                 |

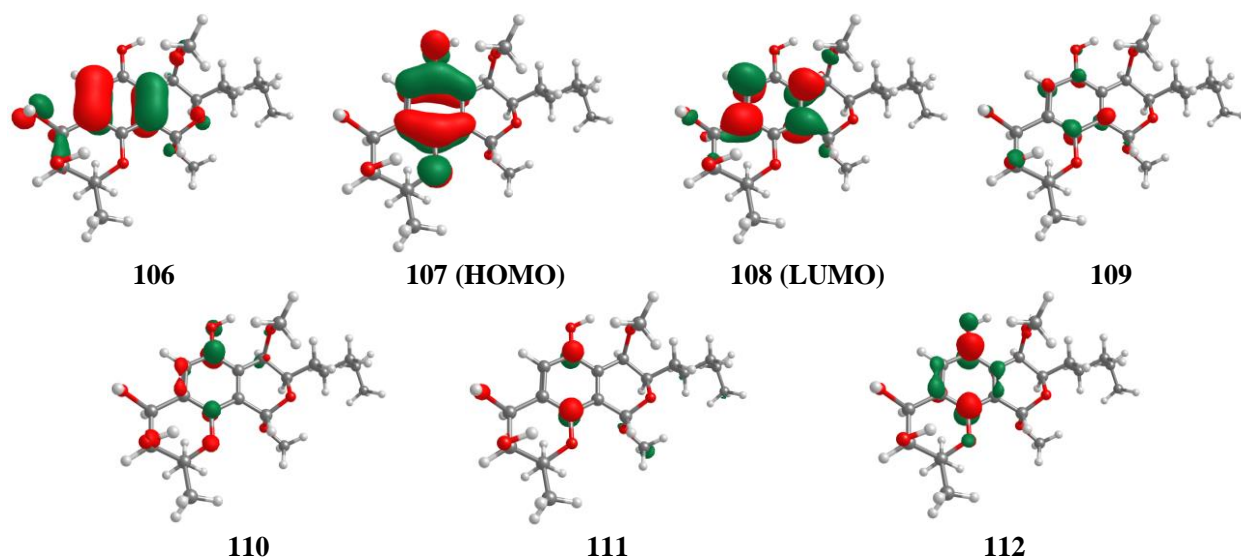

**Figure S17.** Key molecular orbitals involved in important transitions regarding the ECD spectrum of dominant conformer of **6**.

## 6. TDP1 inhibition assay

Briefly, TDP1 solution (20  $\mu$ L/well, 0.02  $\mu$ L of purified TDP1 (100 nM) in 10 mM Tris-HCl, pH 7.5, 50 mM KCl, 1 mM EDTA, 1 mM DTT) was dispensed into wells of a white 384-well plate (NEST). The tested compound solution in DMSO (5  $\mu$ L) was pinned into assay plates and incubated at room temperature for 30 min. During this time, the plates were read by a Flash multimode reader (Molecular Devices) at Ex<sub>485</sub>/Em<sub>510</sub> nm to identify false-positive compound that had autofluorescence. The linear oligonucleotide substrate 5'-FAM-AGGATCTAAAAGACTT-BHQ-3' (25  $\mu$ L, 35 nM) was dispensed into the wells to start the reaction. The whole plate was immediately read five times using a kinetic read on the Flash

multimode reader (Molecular Devices) (Ex<sub>485</sub>/Em<sub>510</sub> nm). TDP1 percentage inhibition of the tested compound was calculated by comparing the rate of increase in fluorescence throughout time for the compound-treated wells to that of DMSO control wells.

## **7. Molecular Modelling**

The X-ray crystal structure of TDP1-ligand complex (PDB: 6DJD) was obtained and cleaned by removing one of the monomers and waters, and inspected for errors. The missing hydrogens were added. The ligand centroid coordination was built as the binding pocket for molecular modeling. Inhibitors were constructed using ChemDraw and saved in mol2 file formats, which were optimized using Discovery Studio software. Every inhibitor was docked 10 times, starting each time from different orientations and the default automatic genetic algorithm parameter settings was used. All torsion angles of the inhibitor were allowed to rotate freely and the results were scored and ranked by using GOLD. The selected top ligand-binding pose was merged into the prepared protein. The calculation was terminated when the gradient reached a value of 0.05 kcal/mol·Å.

## Spectral Information

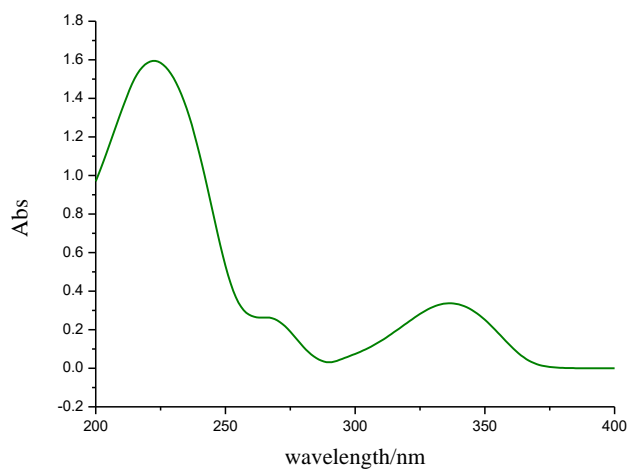

**Figure S18.** UV spectrum of **1** in MeOH.

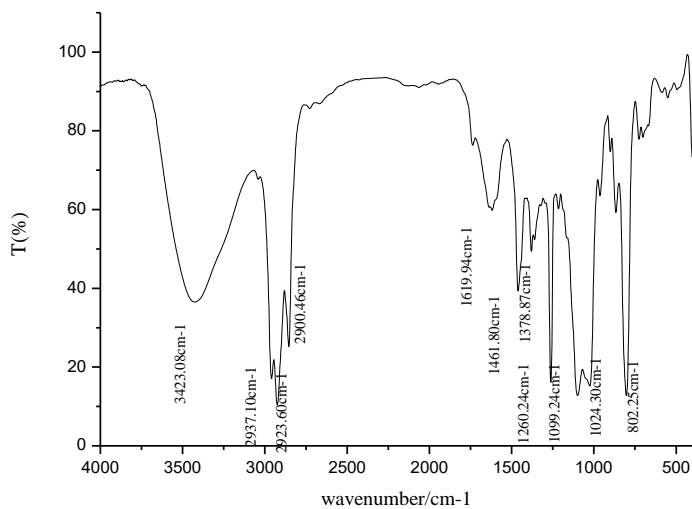

**Figure S19.** IR spectrum of **1** (KBr disc).

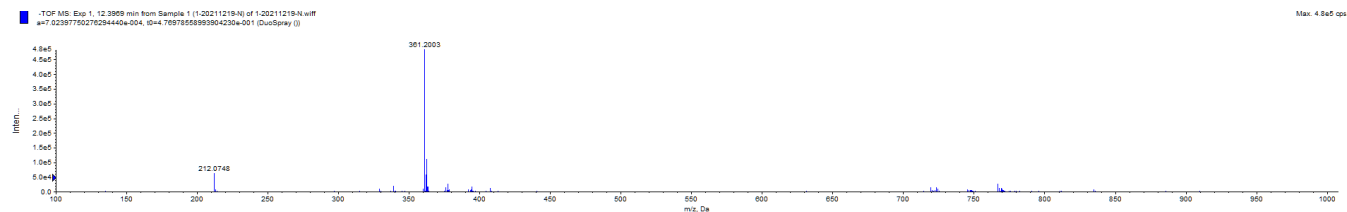

**Figure S20.** HR-ESI-MS of **1**.

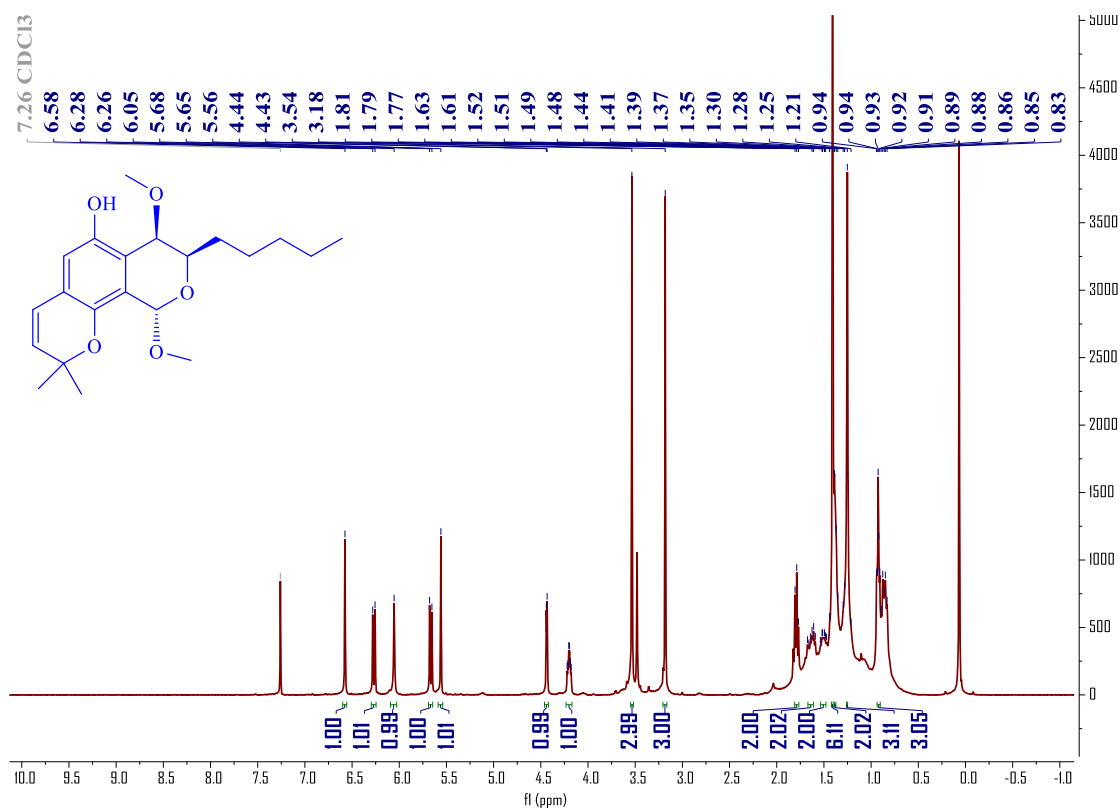

**Figure S21.**  $^1\text{H}$  NMR spectrum of **1** in  $\text{CDCl}_3$ .

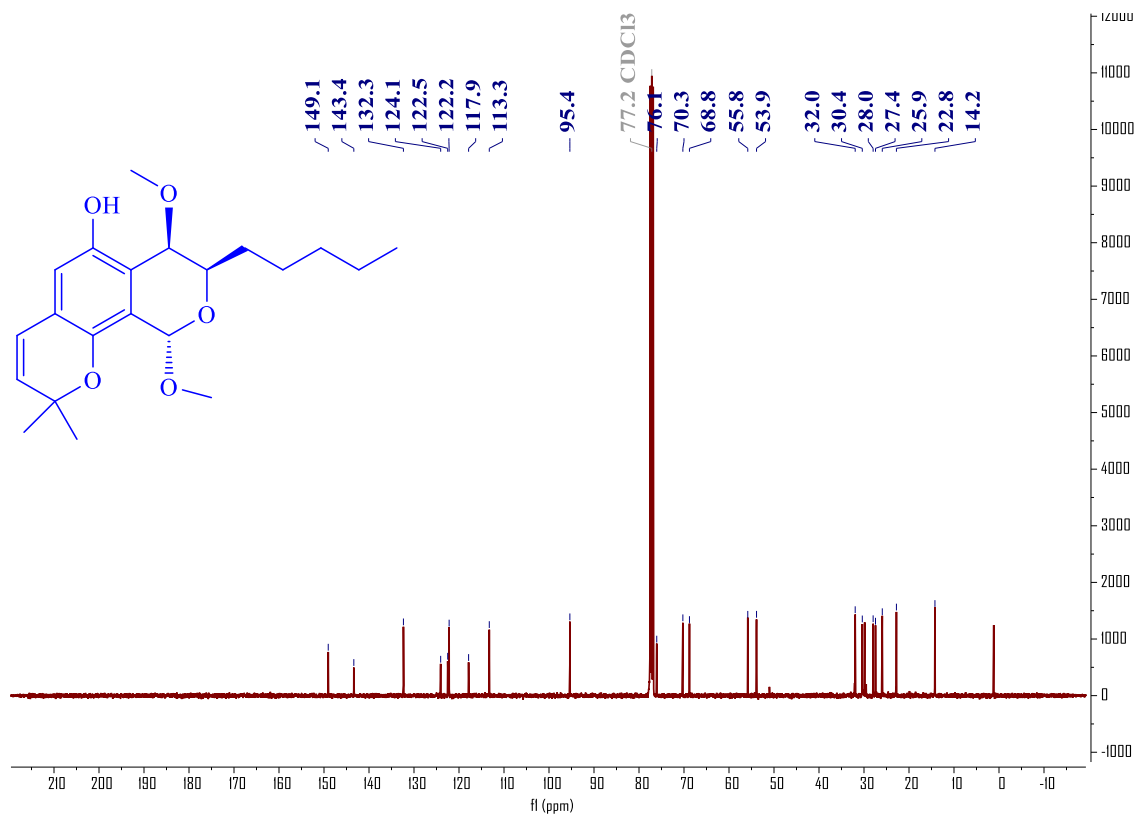

**Figure S22.**  $^{13}\text{C}$  NMR spectrum of **1** in  $\text{CDCl}_3$ .



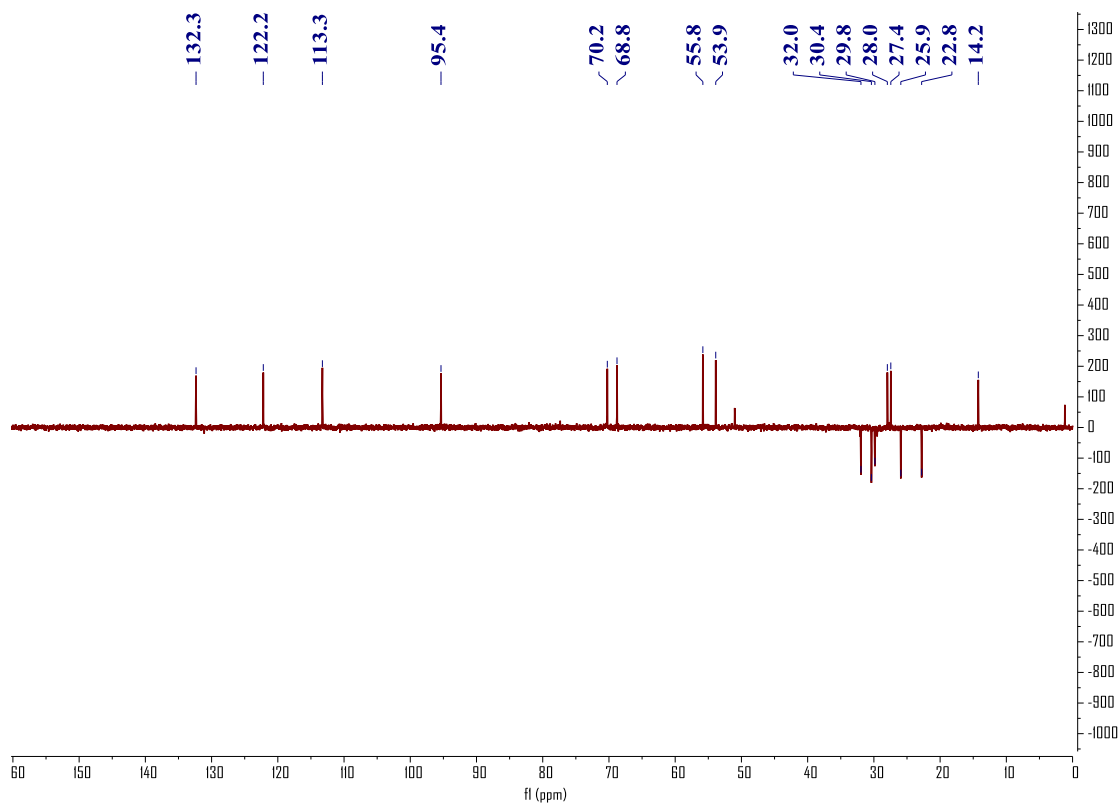

**Figure S23.** DEPT 135 spectrum of **1** in  $\text{CDCl}_3$ .

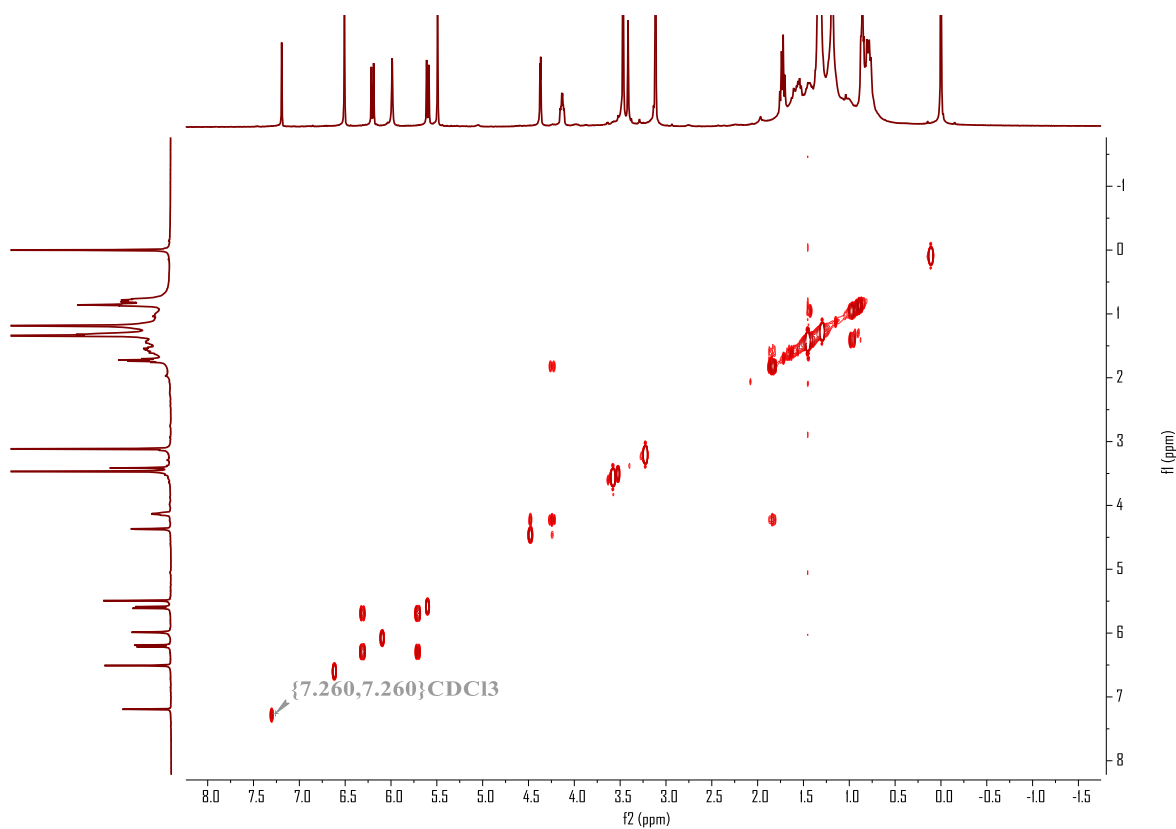

**Figure S24.**  $^1\text{H}$ — $^1\text{H}$  COSY spectrum of **1** in  $\text{CDCl}_3$ .

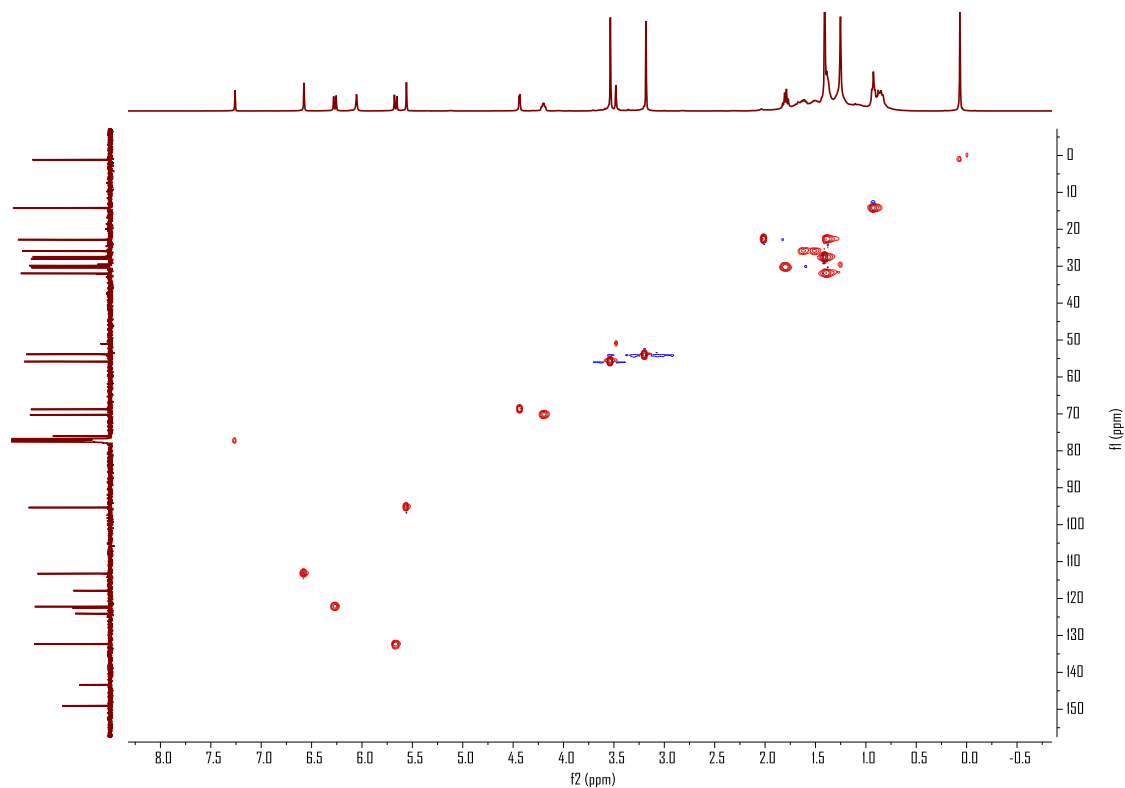

**Figure S25.** HSQC spectrum of **1** in  $\text{CDCl}_3$ .

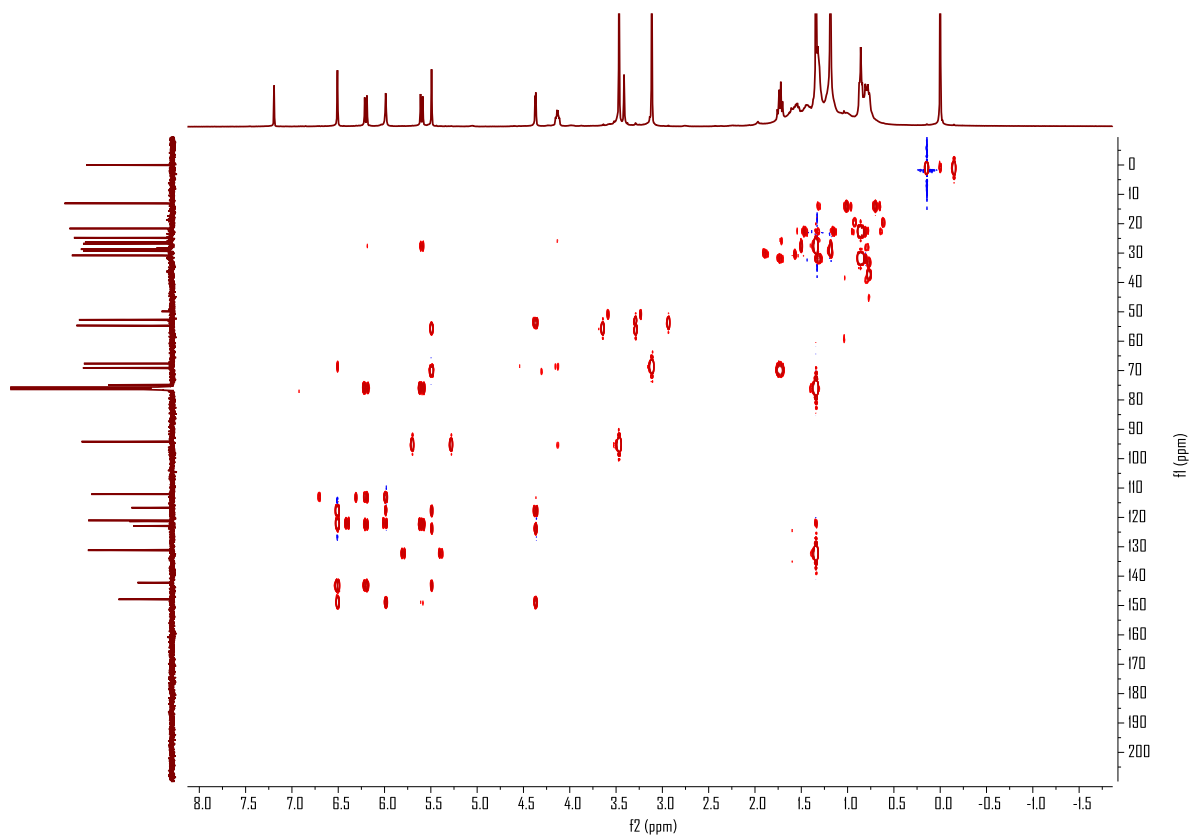

**Figure S26.** HMBC spectrum of **1** in  $\text{CDCl}_3$ .

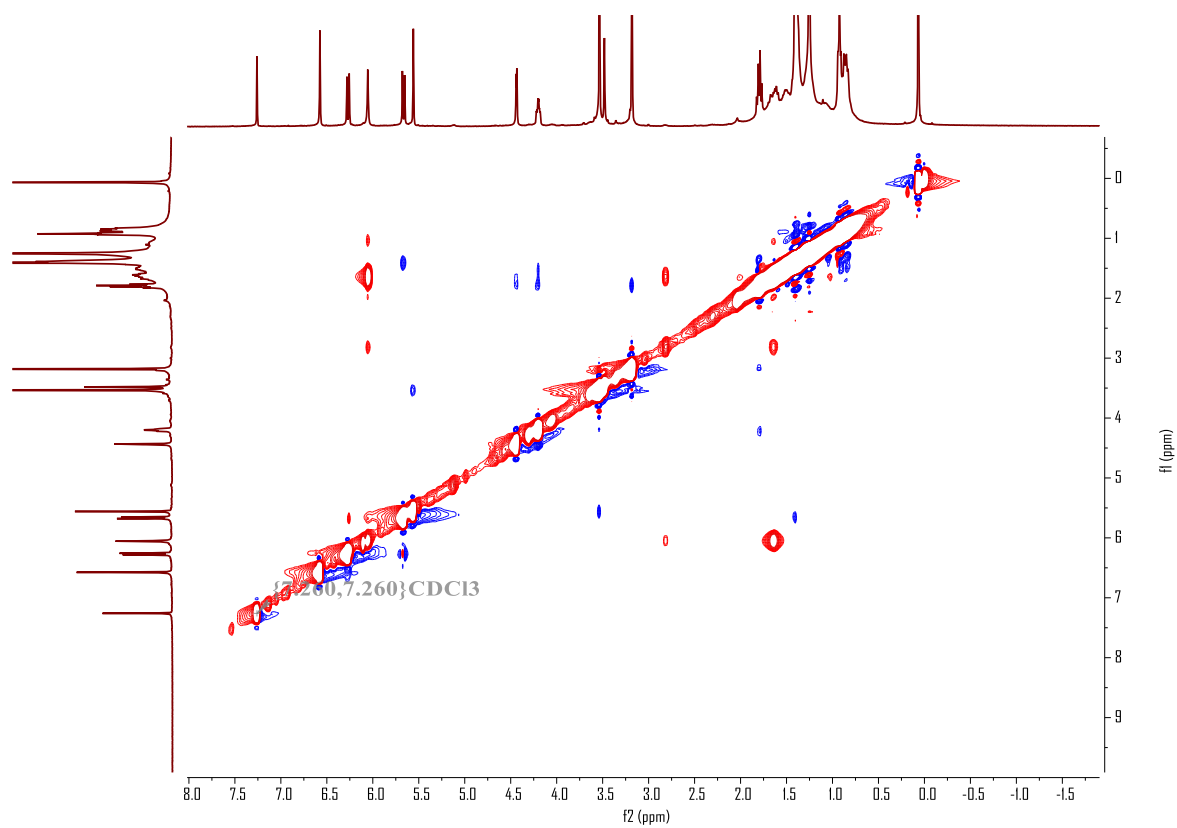

**Figure S27.** NOESY spectrum of **1** in  $\text{CDCl}_3$ .

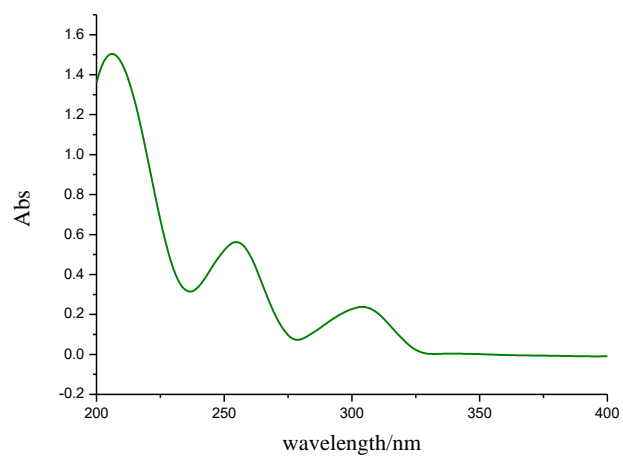

**Figure S28.** UV spectrum of **3** in MeOH.

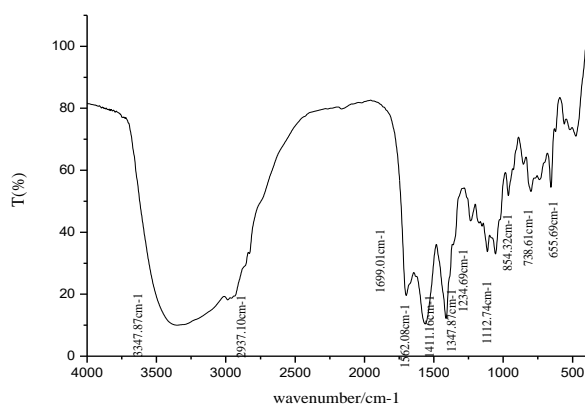

**Figure S29.** IR spectrum of **3** (KBr disc).

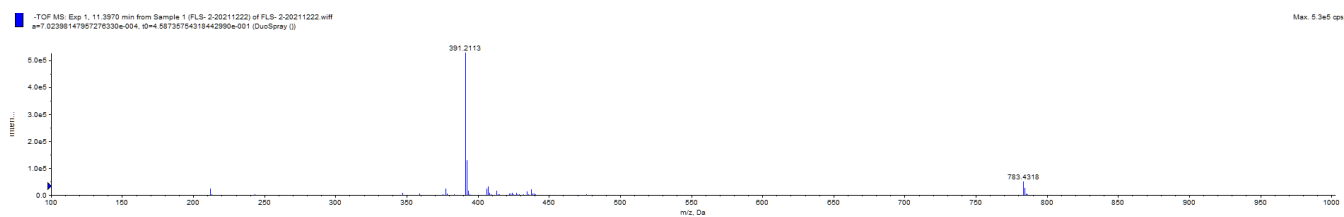

**Figure S30.** HR-ESI-MS of **3**.

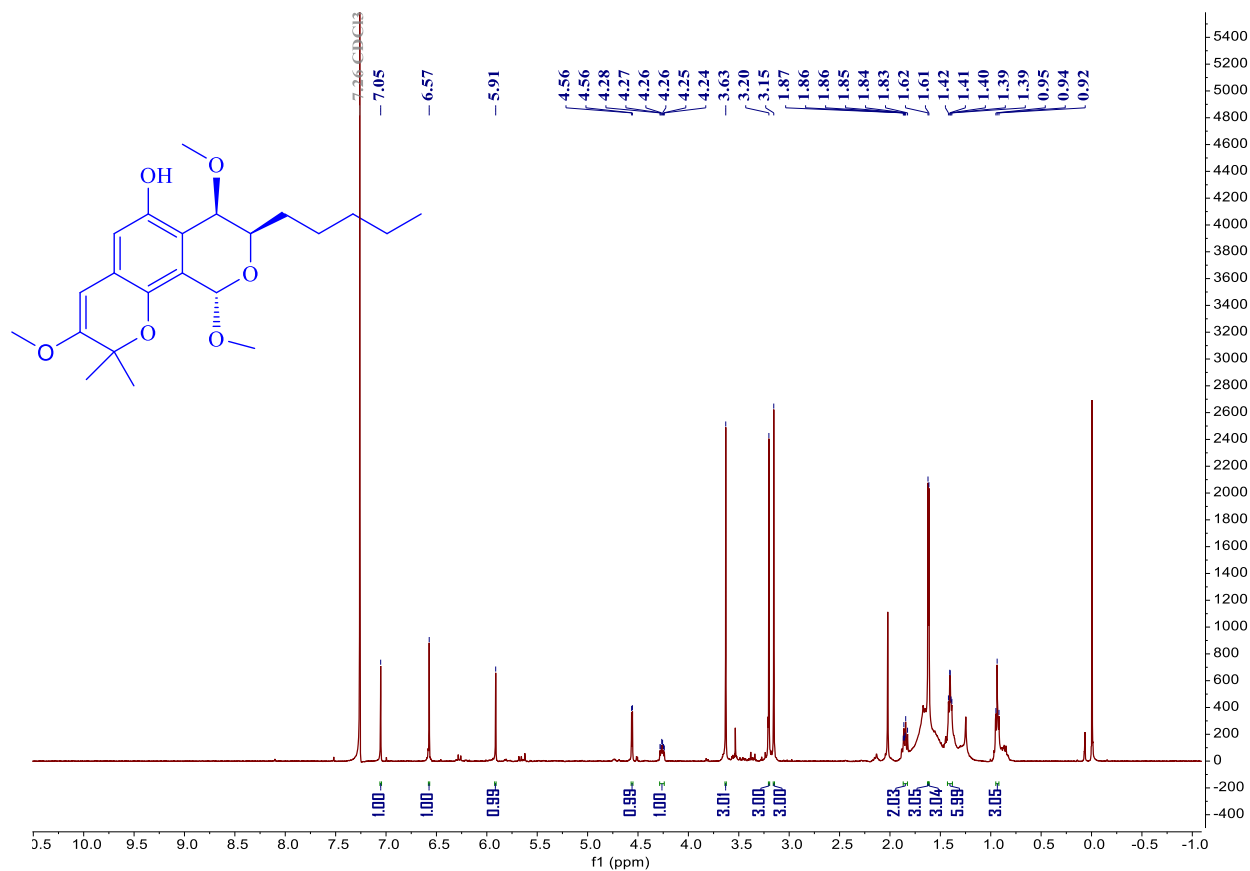

**Figure S31.**  $^1\text{H}$  NMR spectrum of **3** in  $\text{CDCl}_3$ .

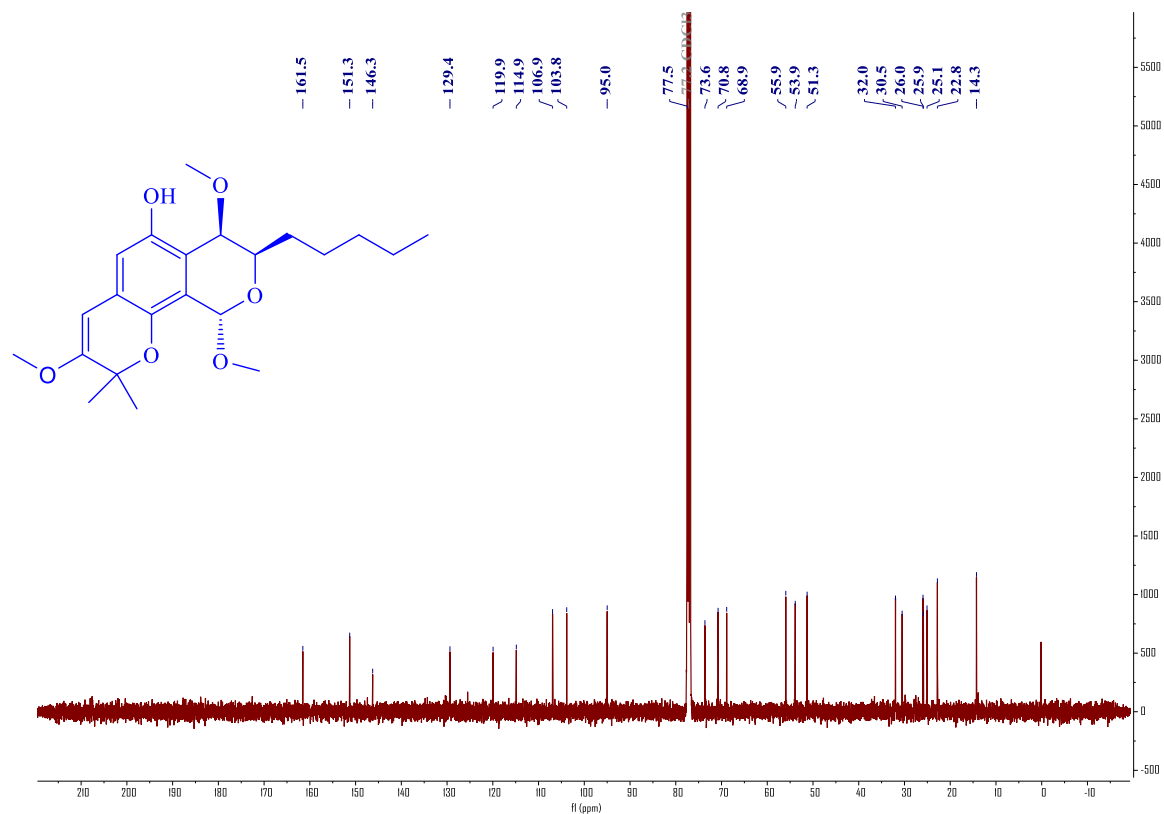

Figure S32. <sup>13</sup>C NMR spectrum of 3 in CDCl<sub>3</sub>.

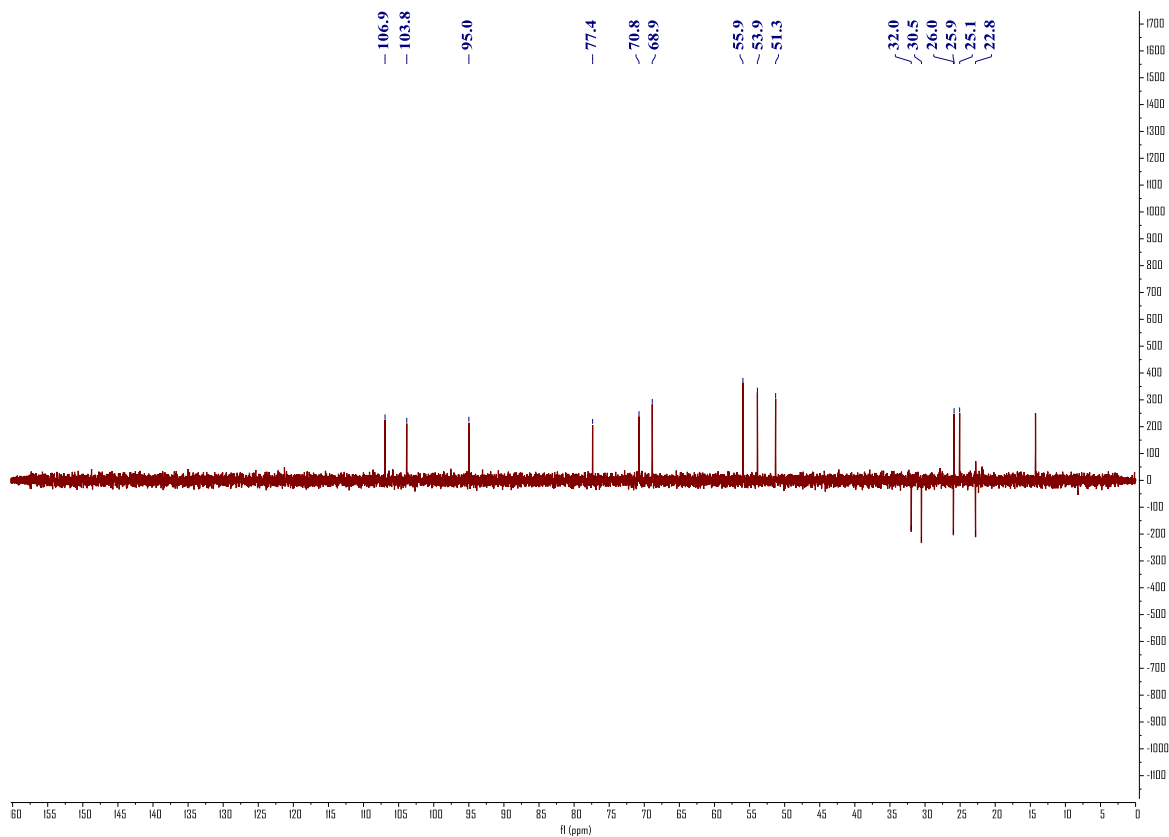

Figure S33. DEPT 135 spectrum of 3 in CDCl<sub>3</sub>.

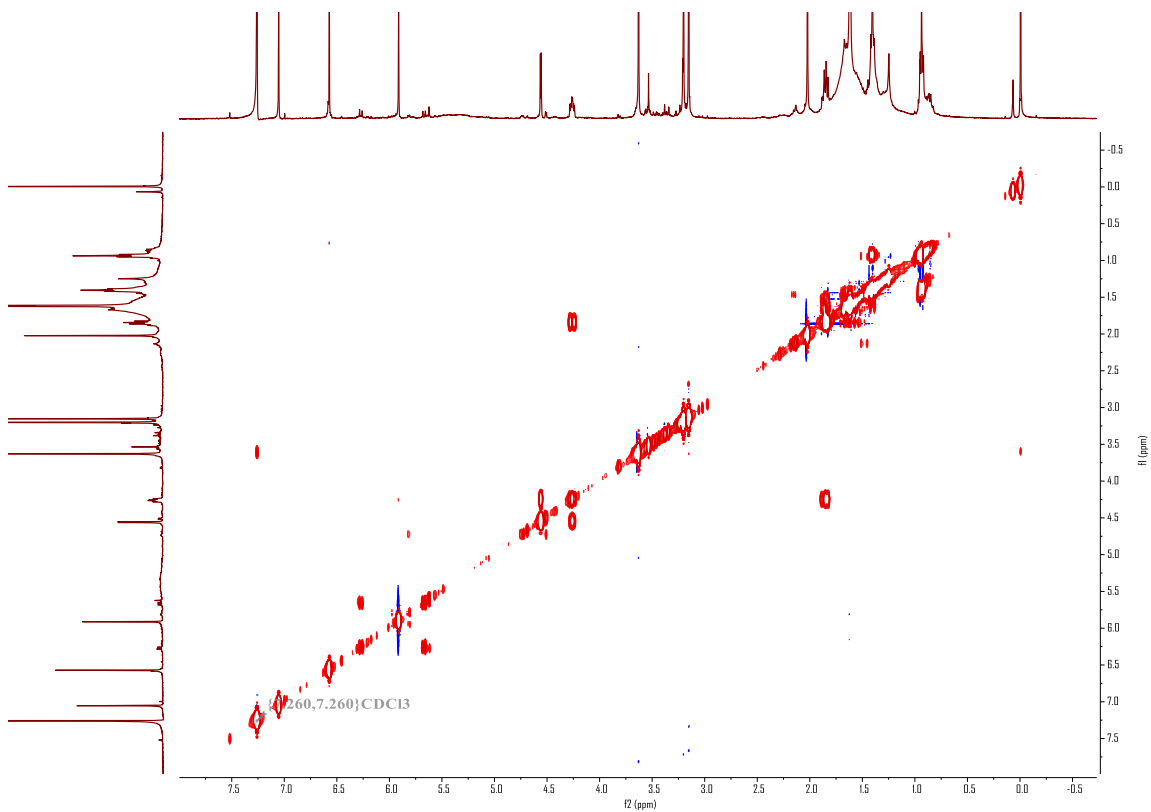

**Figure S34.**  $^1\text{H}-^1\text{H}$  COSY spectrum of **3** in  $\text{CDCl}_3$ .

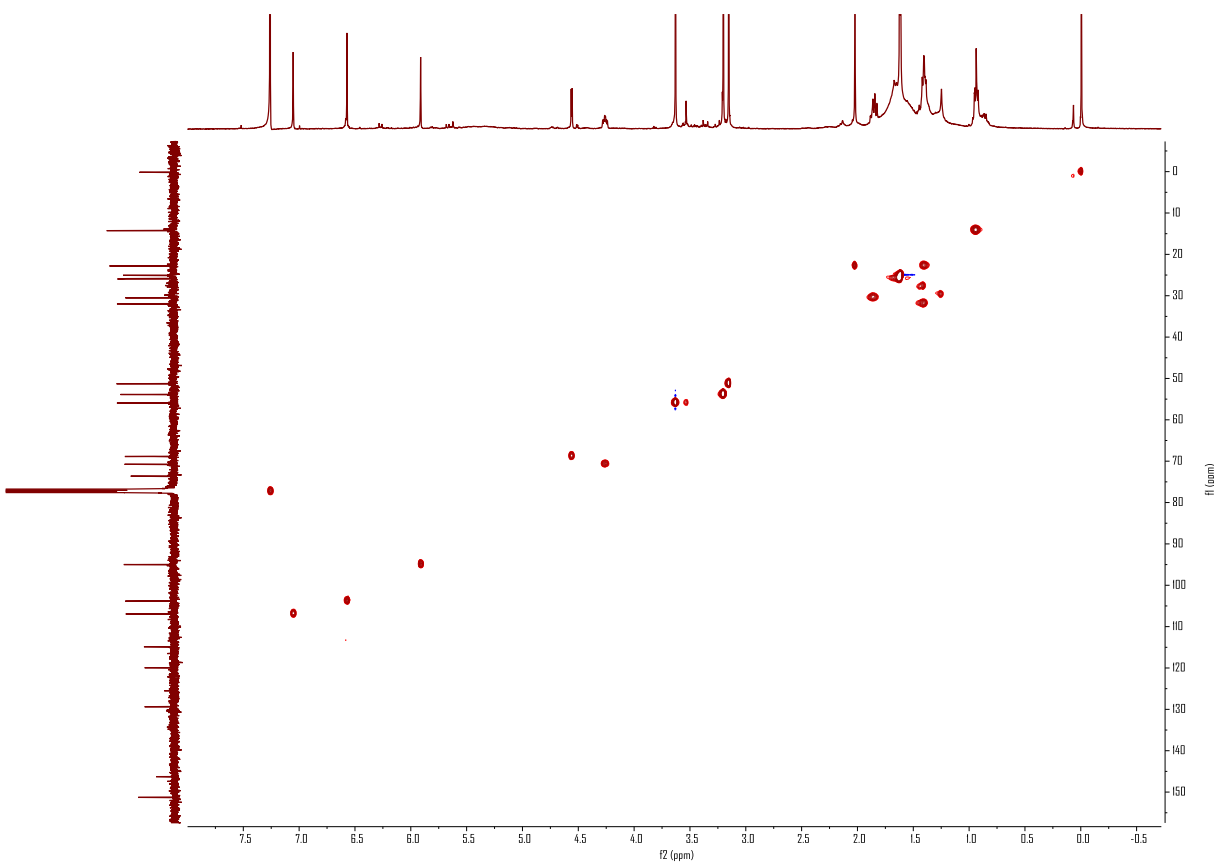

**Figure S35.** HSQC spectrum of **3** in  $\text{CDCl}_3$ .

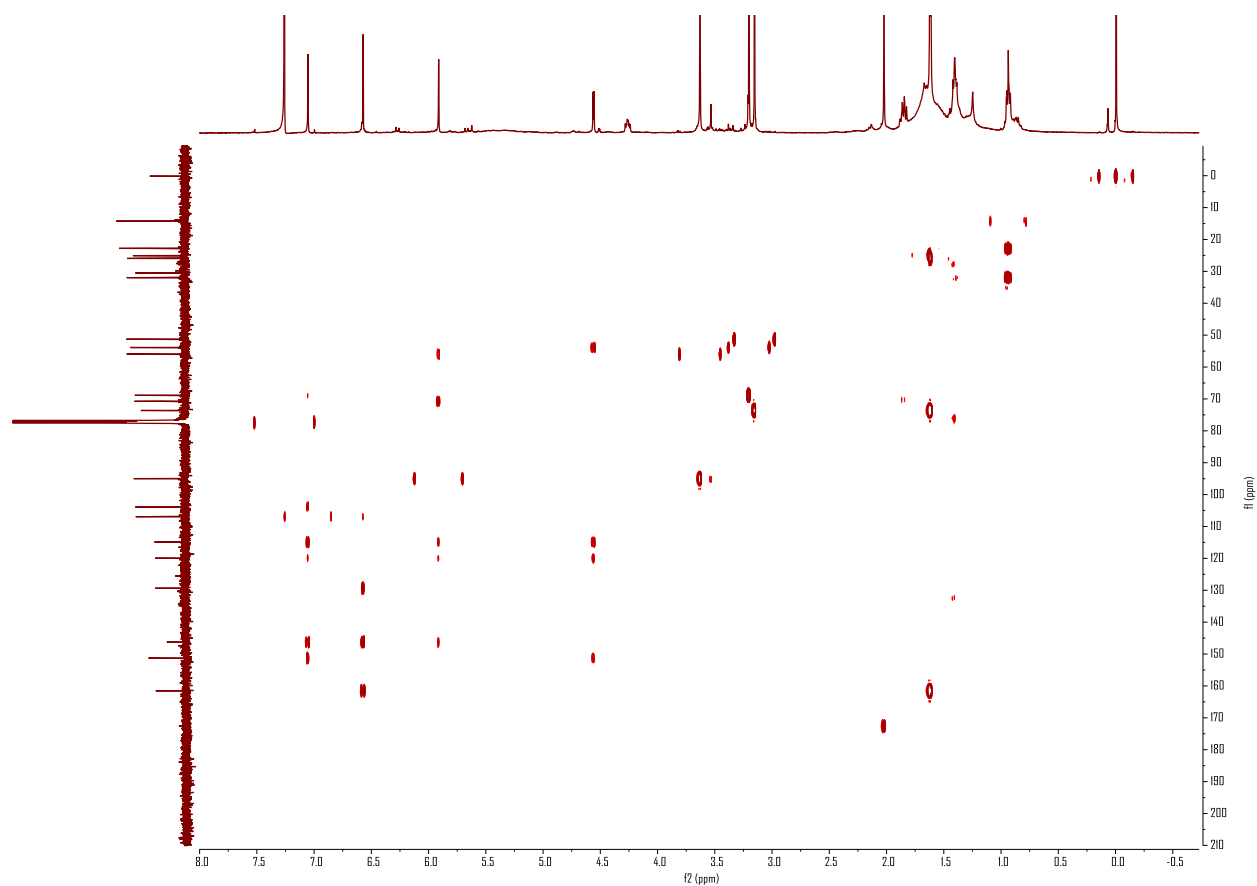

**Figure S36.** HMBC spectrum of **3** in CDCl<sub>3</sub>.

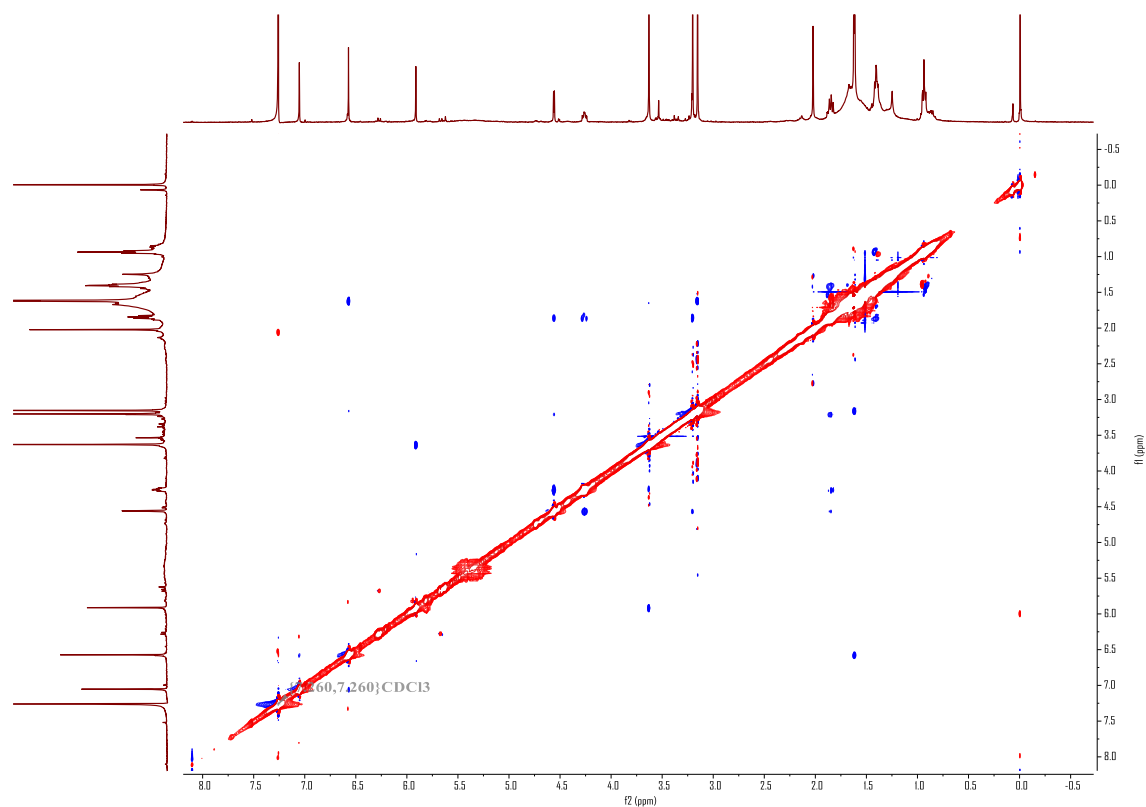

**Figure S37.** NOESY spectrum of **3** in CDCl<sub>3</sub>.

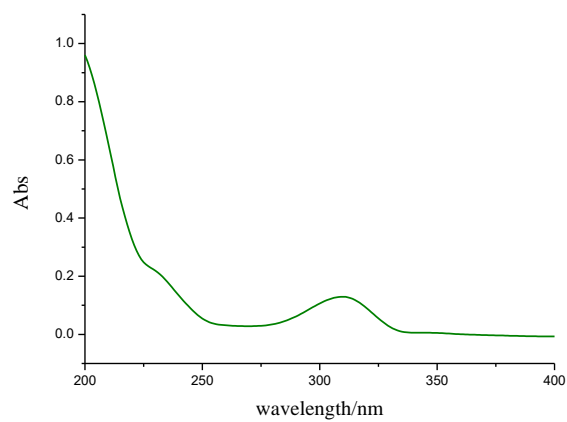

**Figure S38.** UV spectrum of **4** in MeOH.

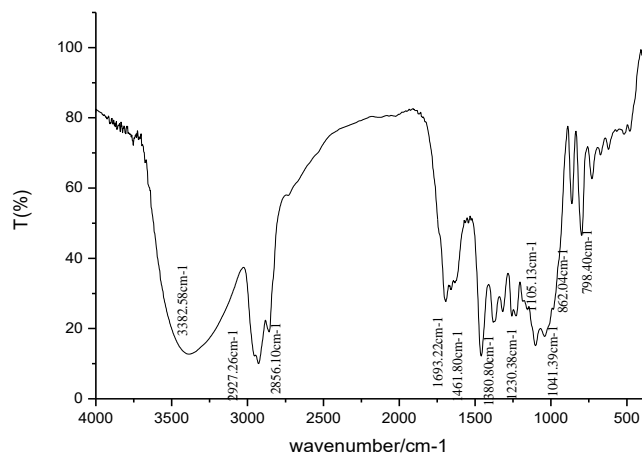

**Figure S39.** IR spectrum of **4** (KBr disc).

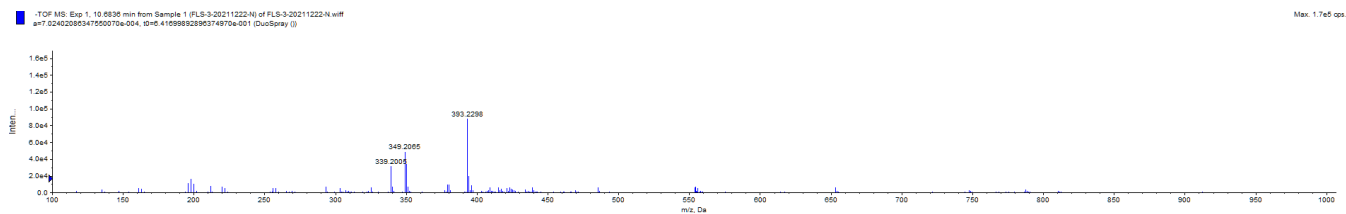

**Figure S40.** HR-ESI-MS of **4**.



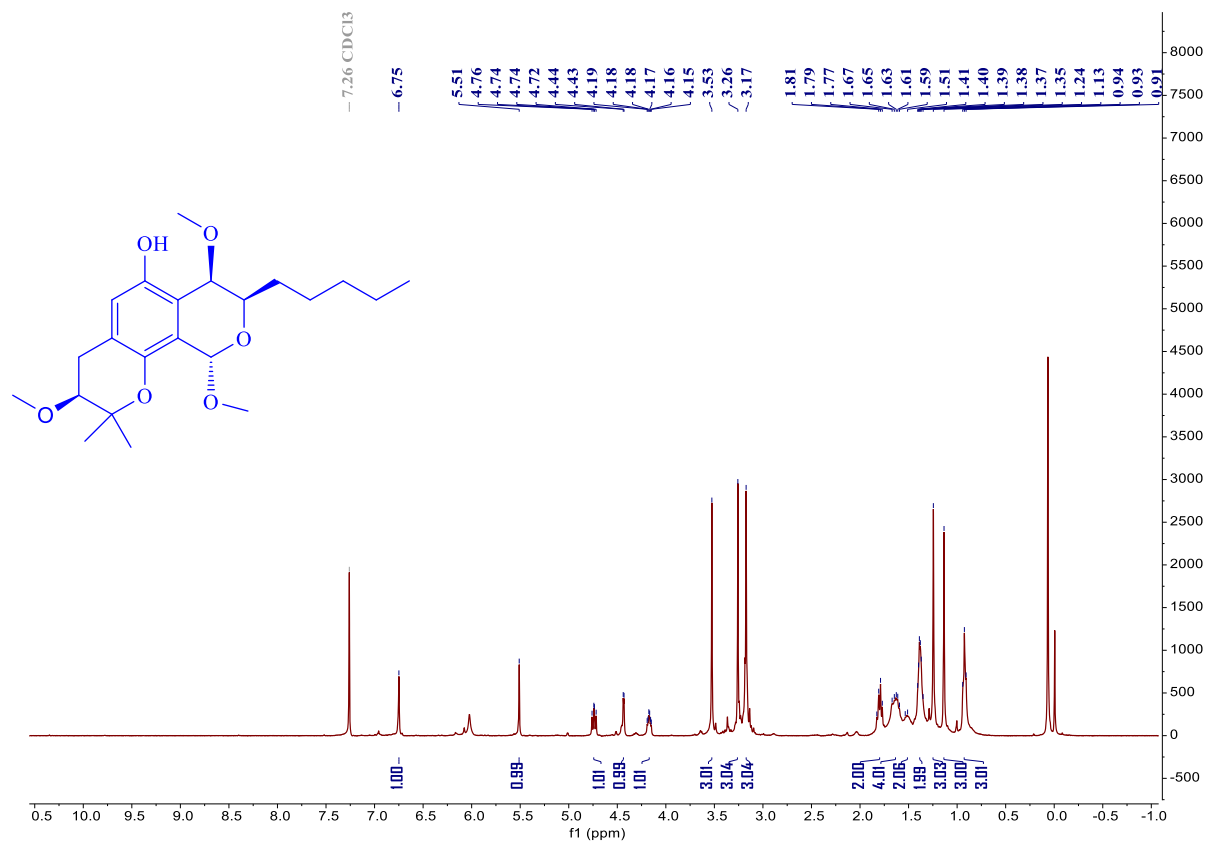

**Figure S41.**  $^1\text{H}$  NMR spectrum of **4** in  $\text{CDCl}_3$ .

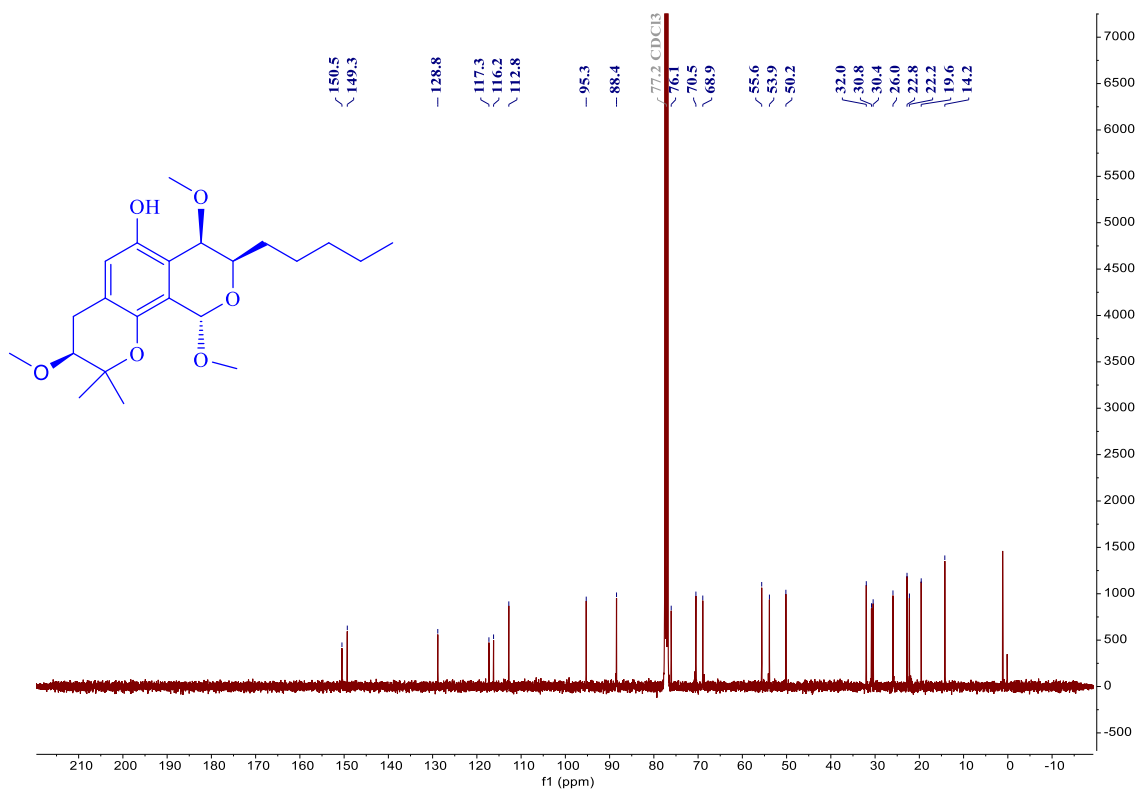

**Figure S42.**  $^{13}\text{C}$  NMR spectrum of **4** in  $\text{CDCl}_3$ .

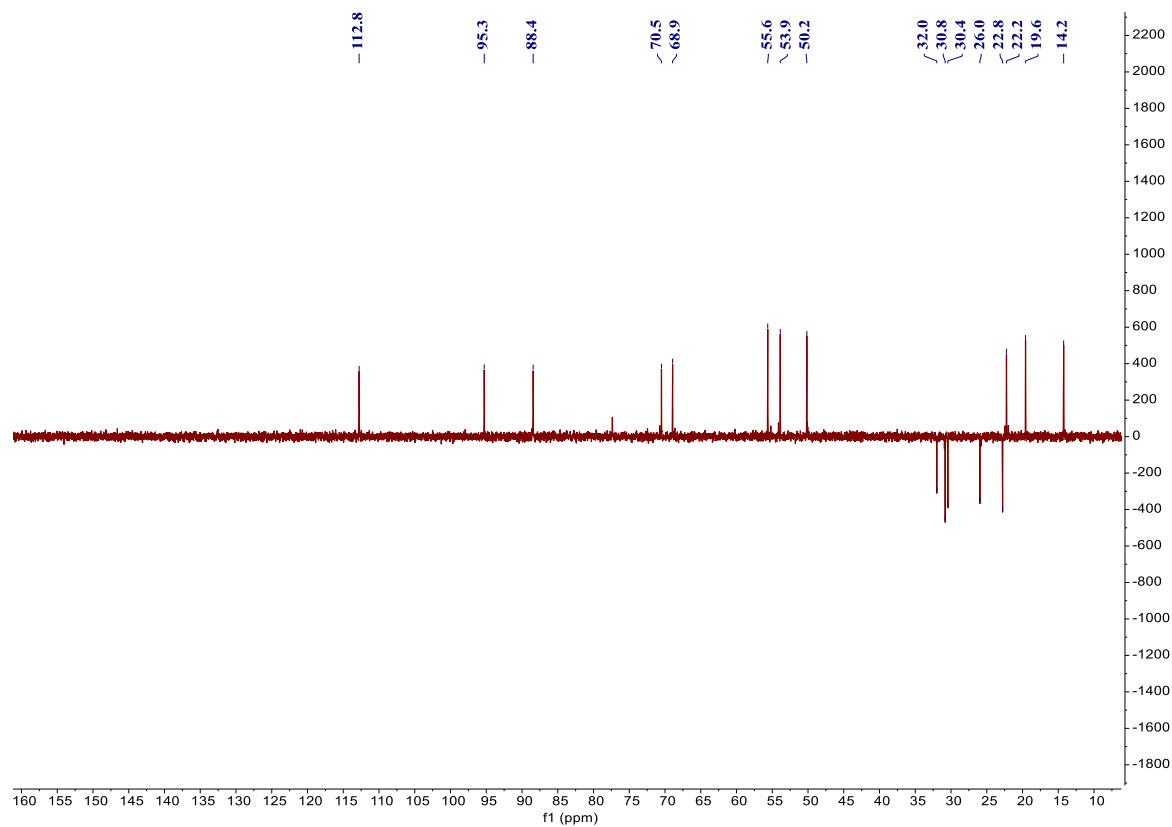

**Figure S43.** DEPT 135 spectrum of **4** in  $\text{CDCl}_3$ .

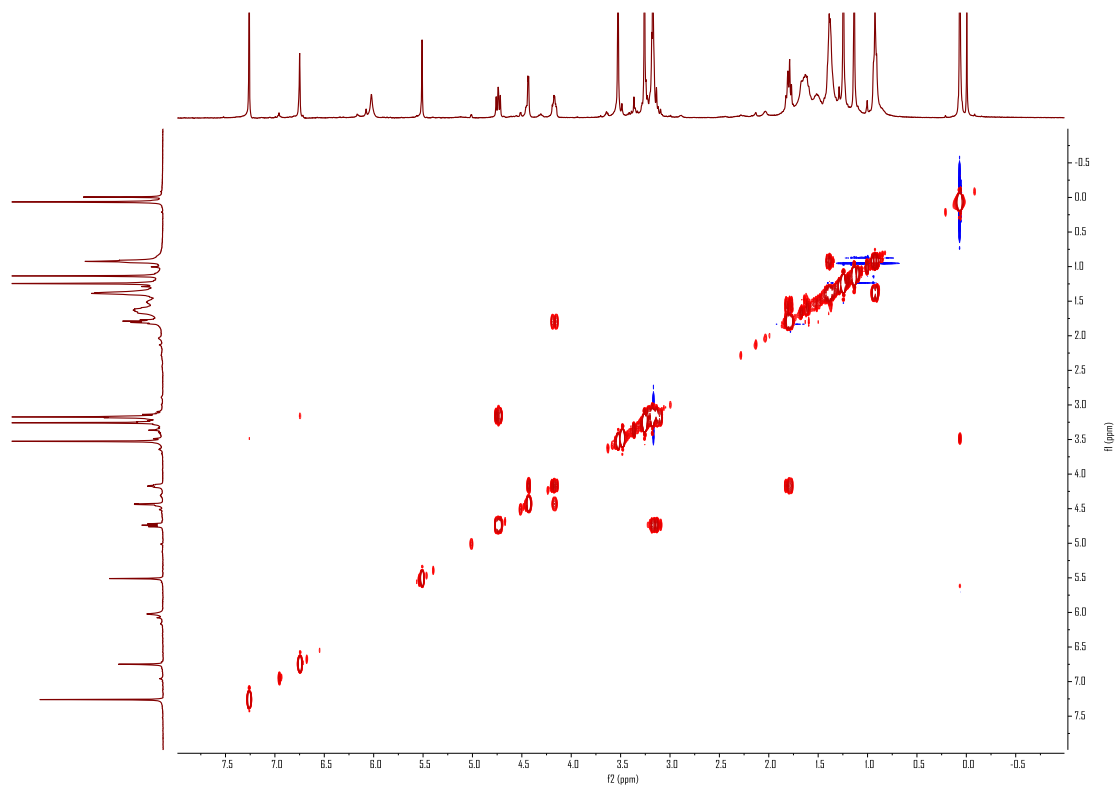

**Figure S44.**  $^1\text{H}$ — $^1\text{H}$  COSY spectrum of **4** in  $\text{CDCl}_3$ .

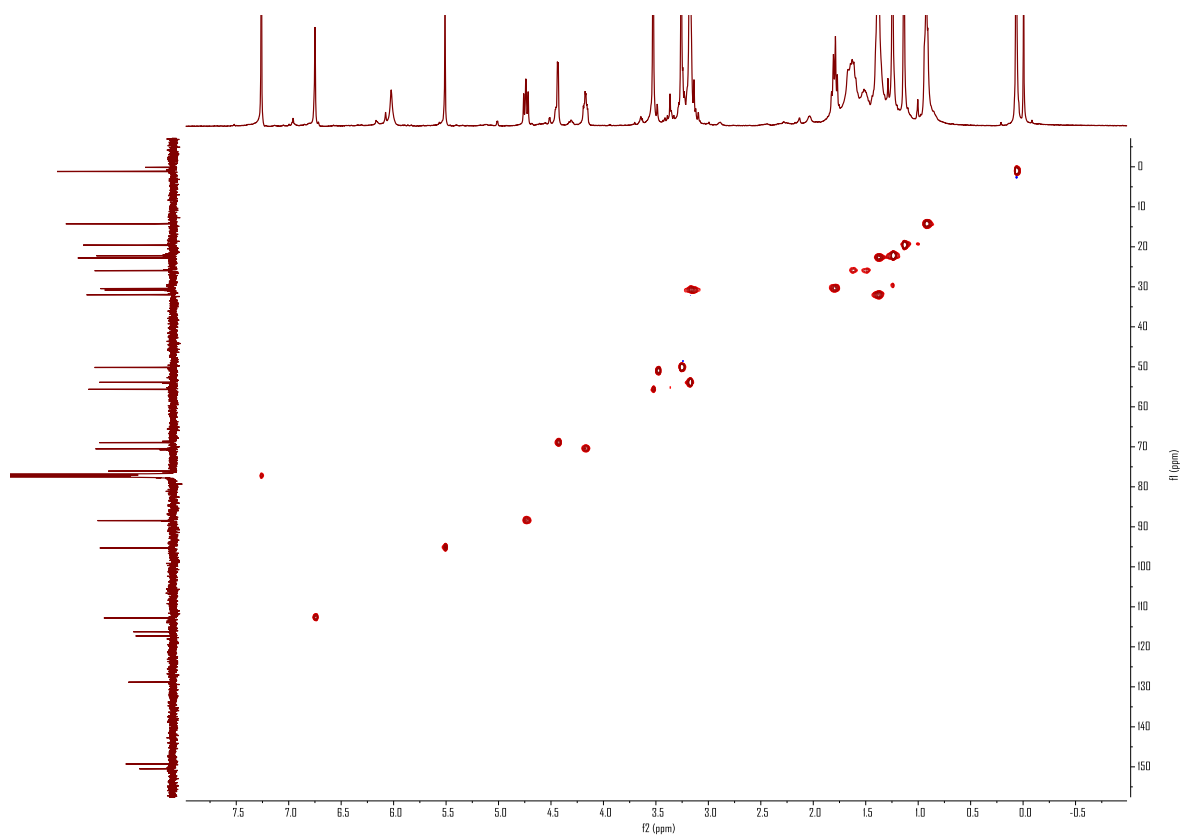

**Figure S45.** HSQC spectrum of **4** in CDCl<sub>3</sub>.

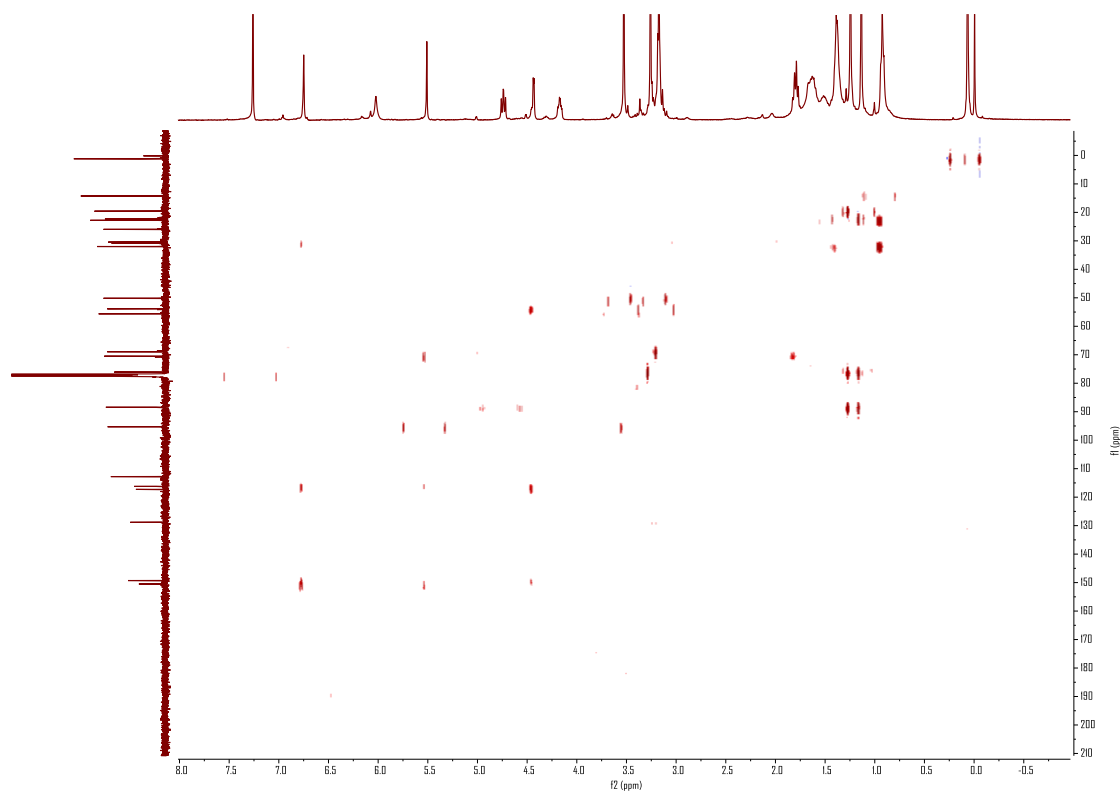

**Figure S46.** HMBC spectrum of **4** in CDCl<sub>3</sub>.

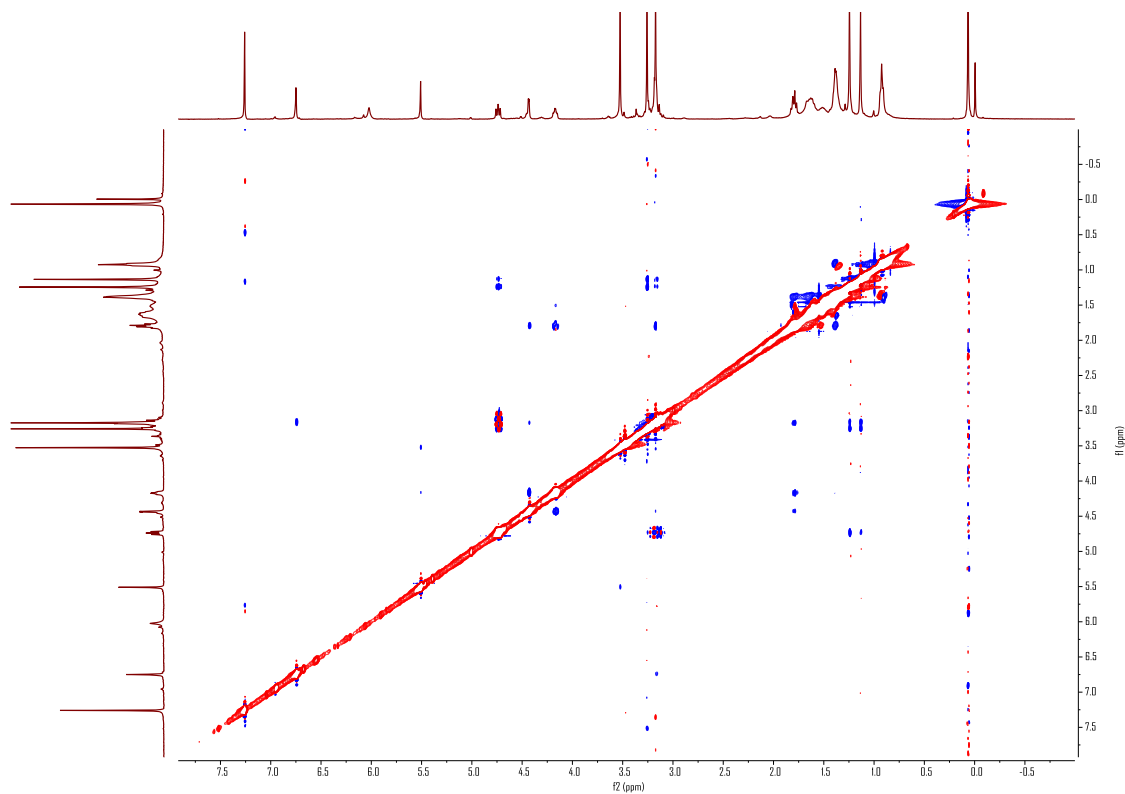

**Figure S47.** NOESY spectrum of **4** in  $\text{CDCl}_3$ .

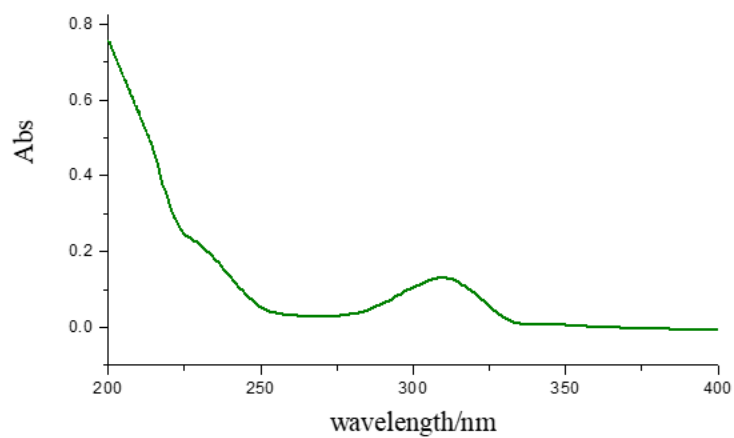

**Figure S48.** UV spectrum of **5** in MeOH.

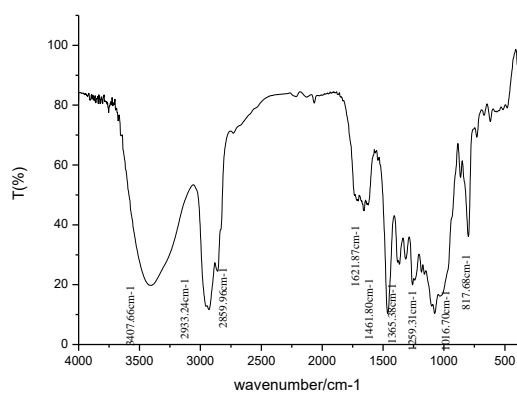

**Figure S49.** IR spectrum of **5** (KBr disc).

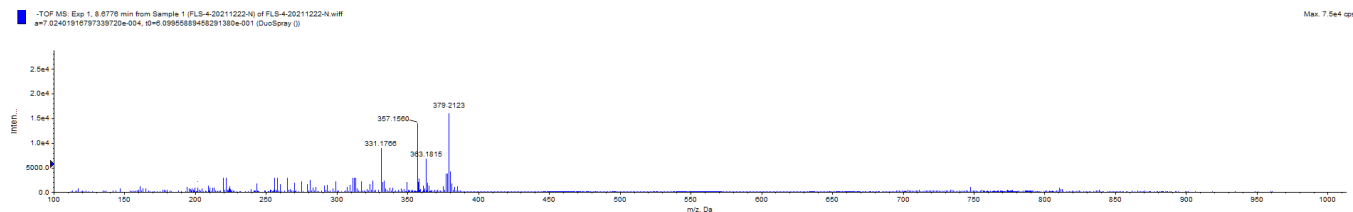

**Figure S50.** HR-ESI-MS of **5**.

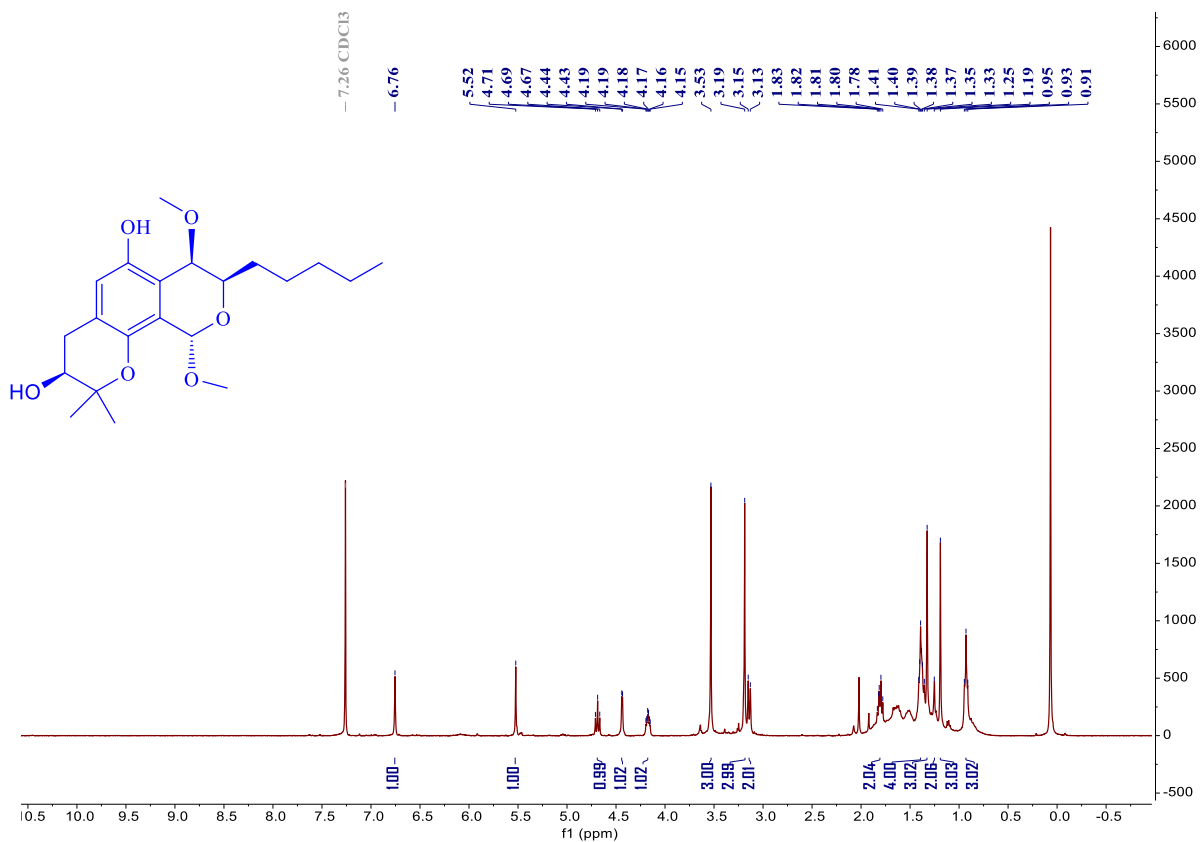

**Figure S51.**  $^1\text{H}$  NMR spectrum of **5** in  $\text{CDCl}_3$ .

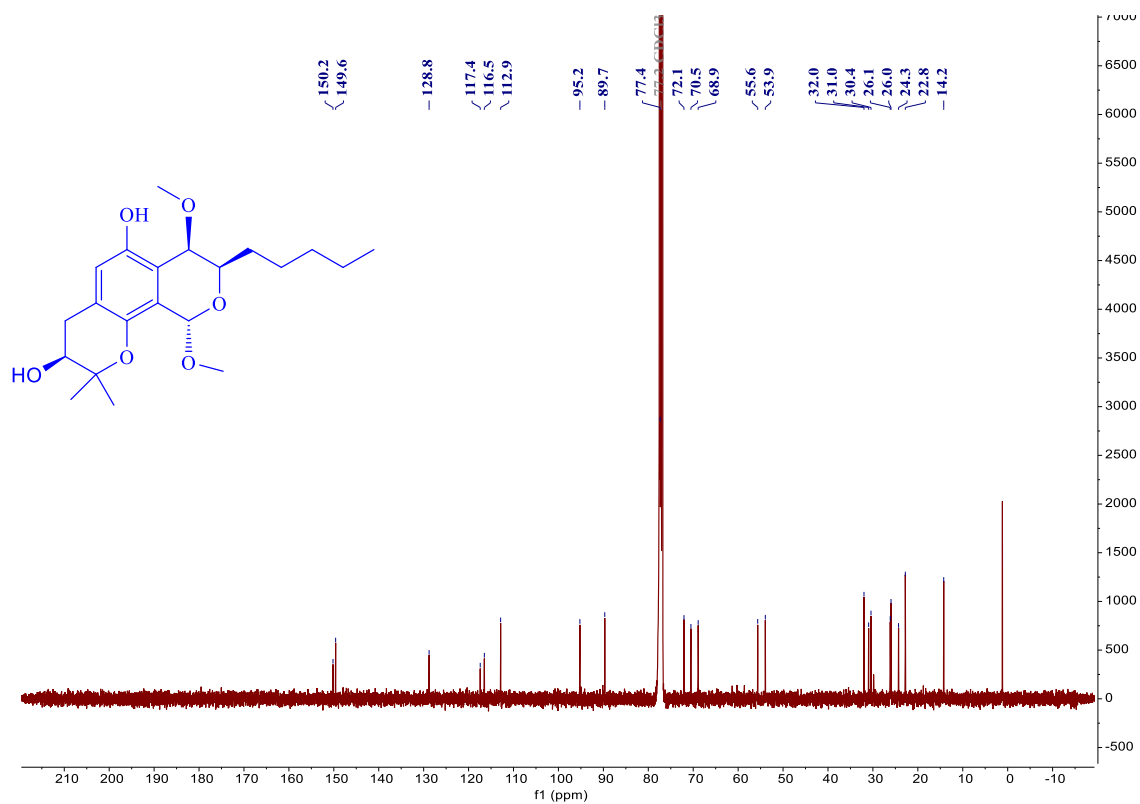

**Figure S52.** <sup>13</sup>C NMR spectrum of **5** in CDCl<sub>3</sub>.

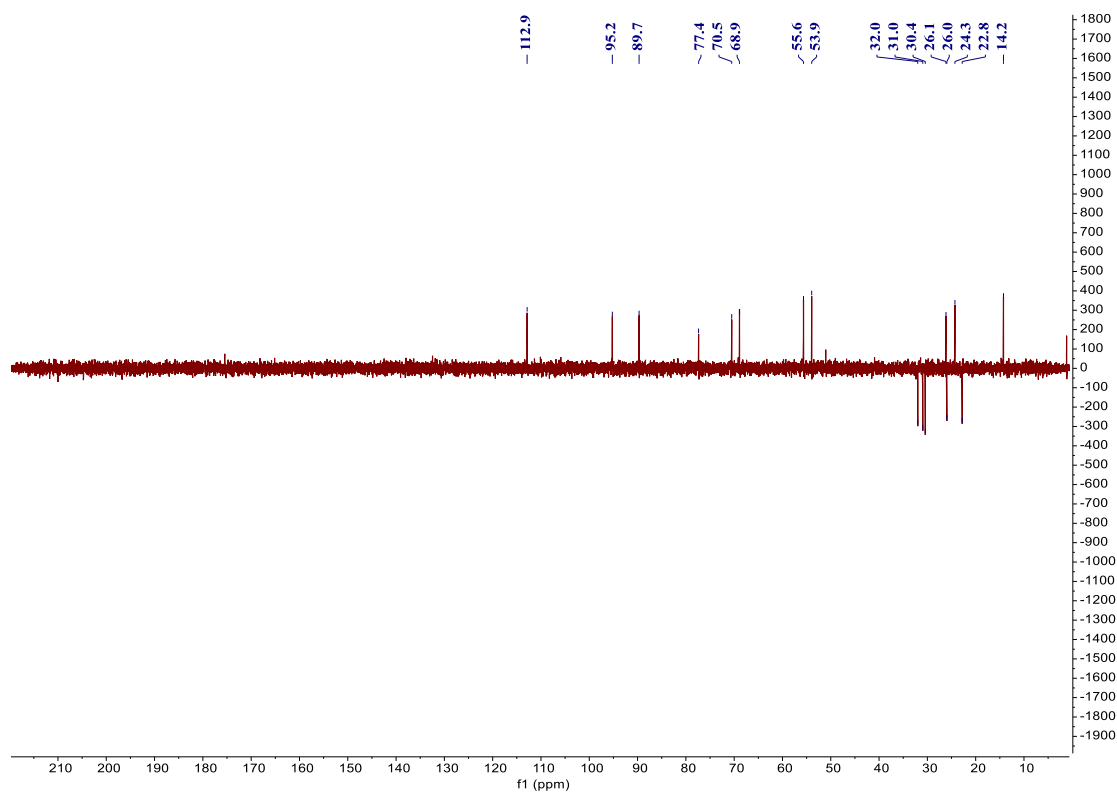

**Figure S53.** DEPT 135 spectrum of **5** in CDCl<sub>3</sub>.

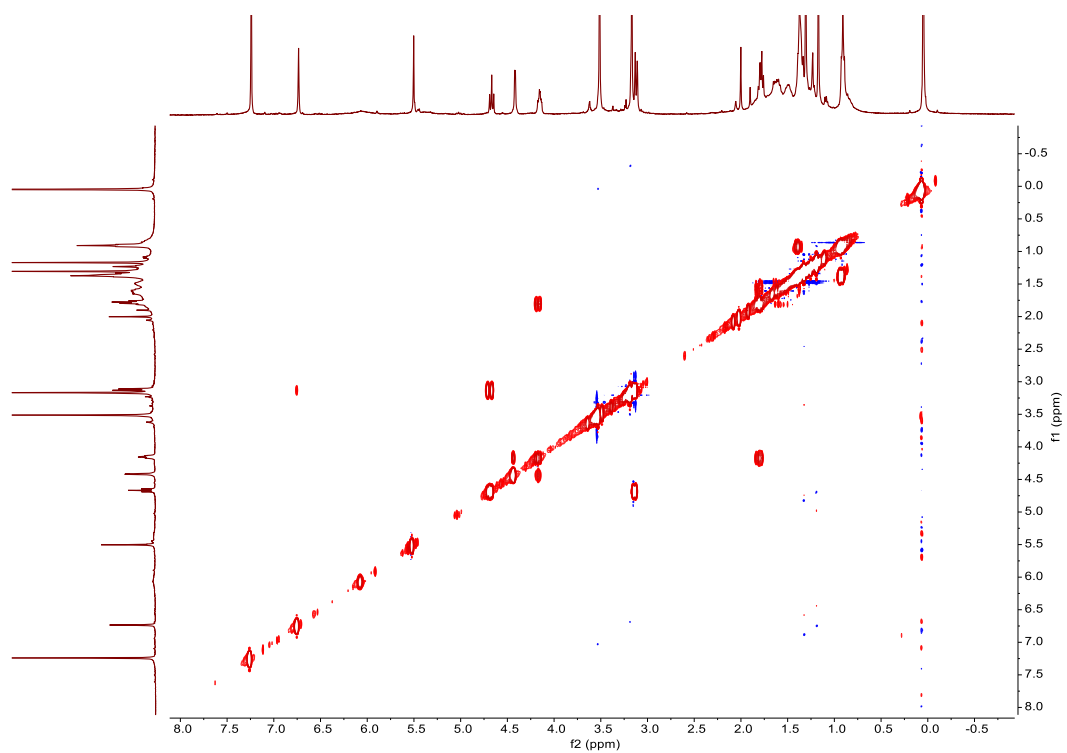

**Figure S54.**  $^1\text{H}$ — $^1\text{H}$  COSY spectrum of **5** in  $\text{CDCl}_3$ .

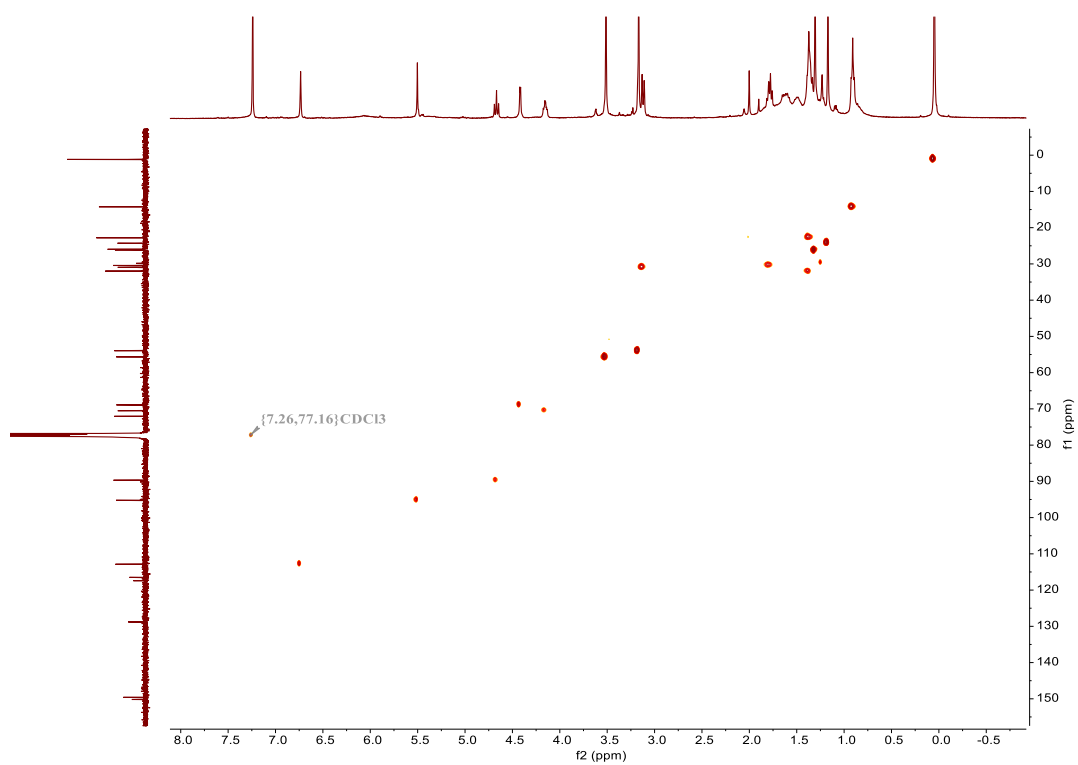

**Figure S55.** HSQC spectrum of **5** in  $\text{CDCl}_3$ .

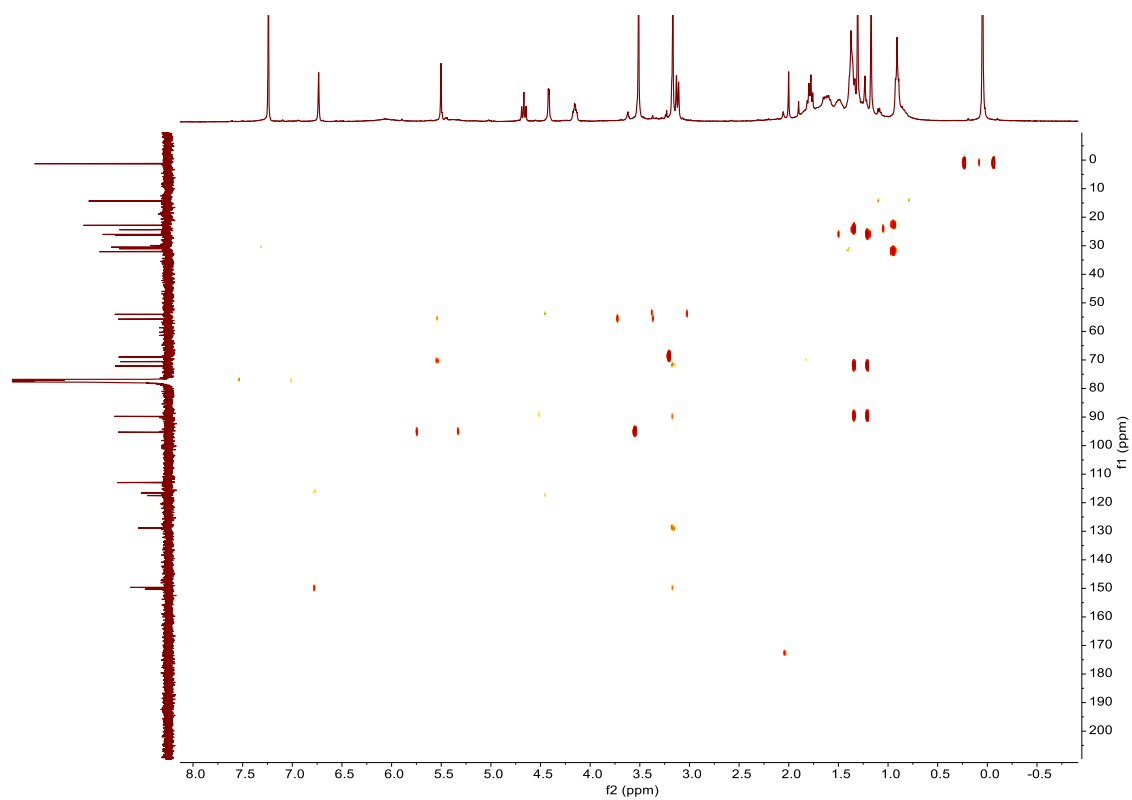

**Figure S56.** HMBC spectrum of **5** in CDCl<sub>3</sub>.

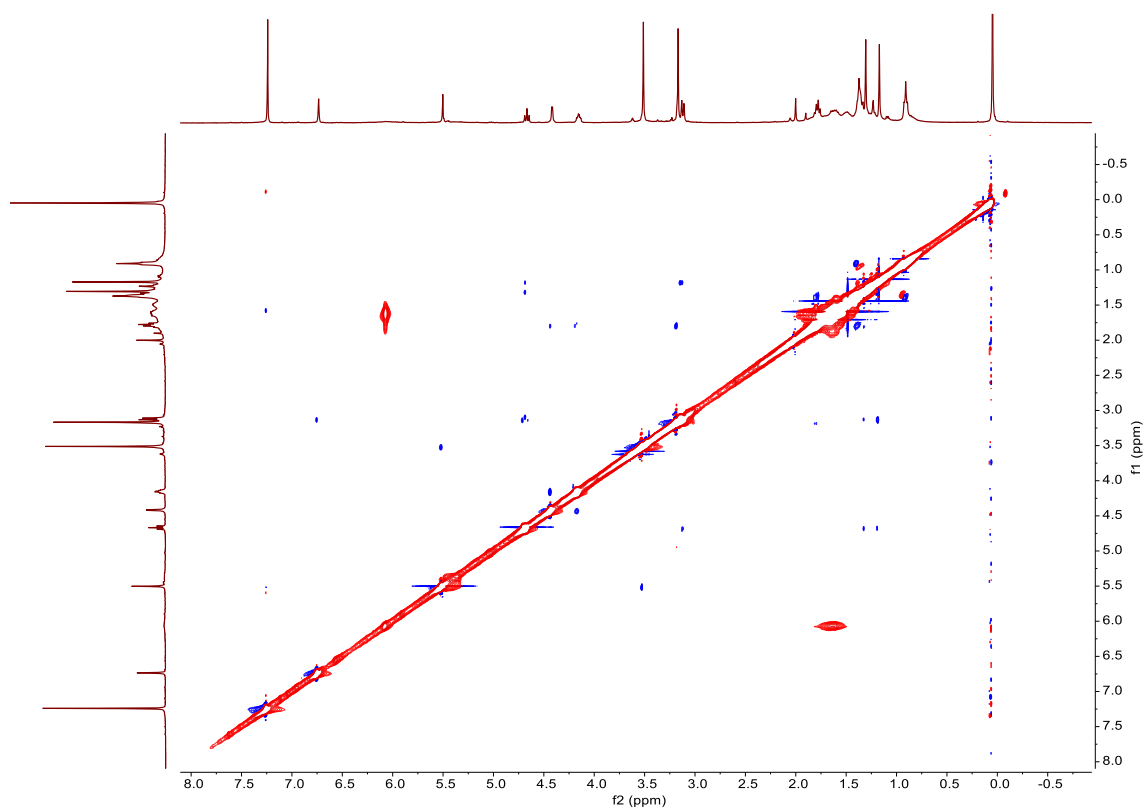

**Figure S57.** NOESY spectrum of **5** in CDCl<sub>3</sub>.



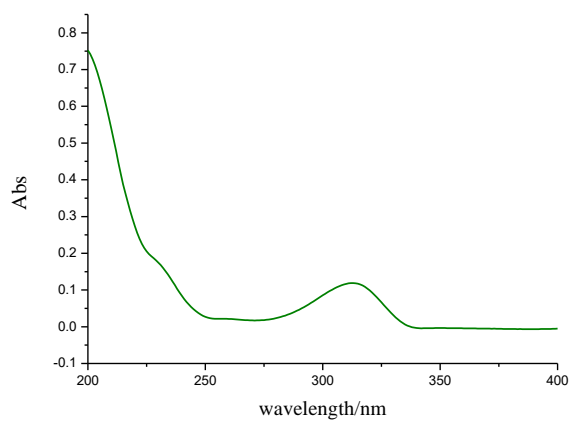

**Figure S58.** UV spectrum of **6** in MeOH.

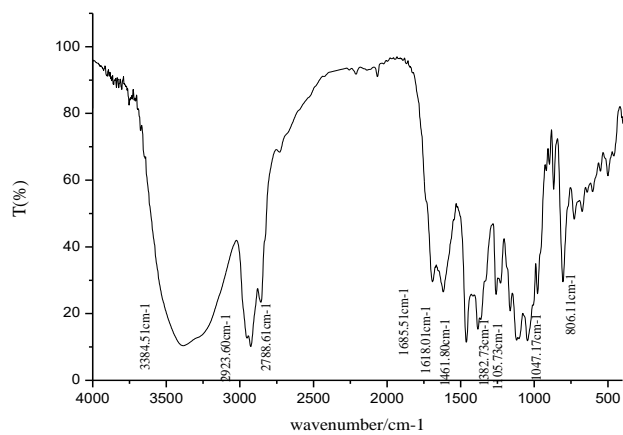

**Figure S59.** IR spectrum of **6** (KBr disc).

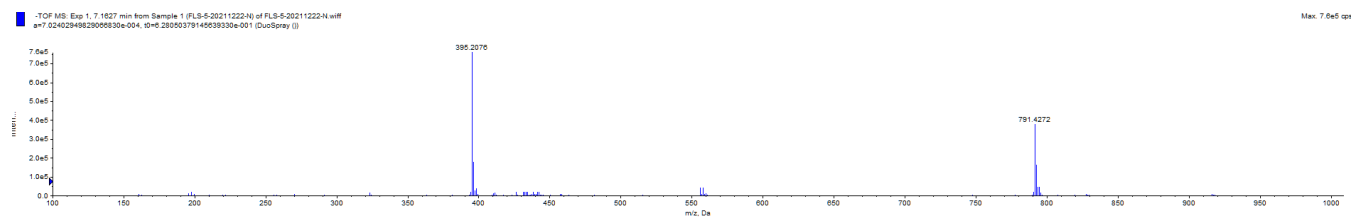

**Figure S60.** HR-ESI-MS of **6**.

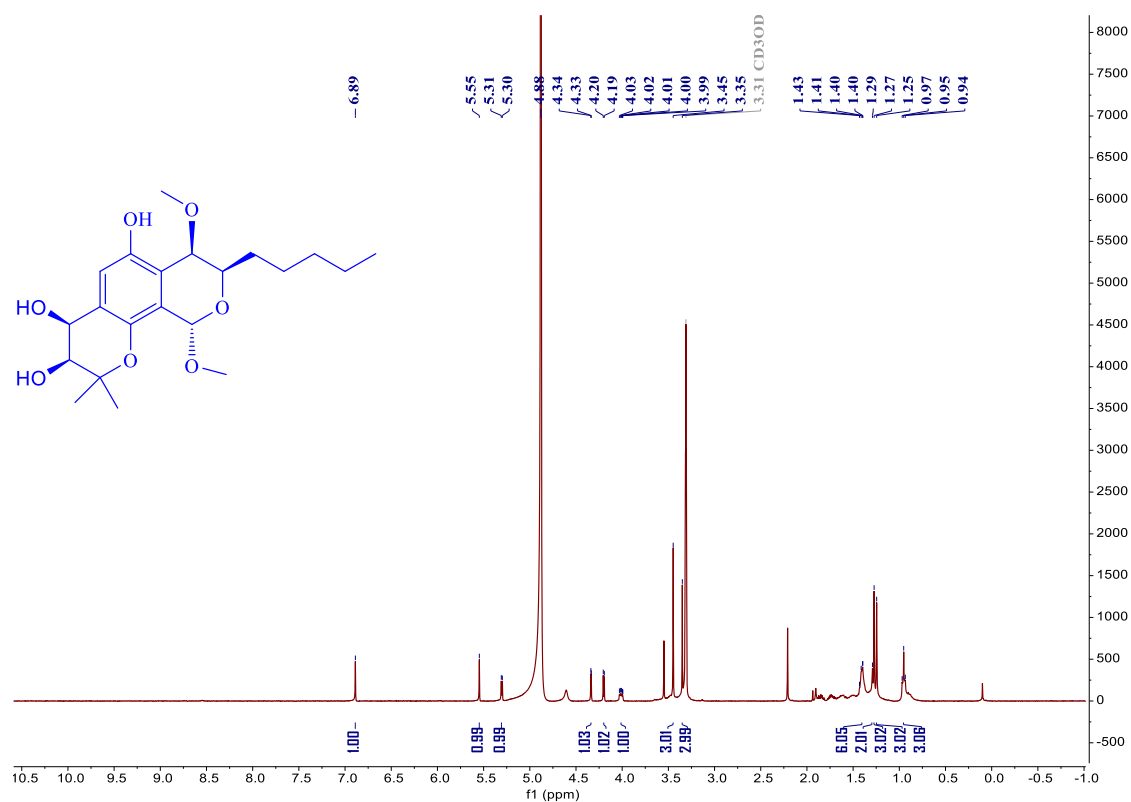

Figure S61. <sup>1</sup>H NMR spectrum of 6 in CD<sub>3</sub>OD.

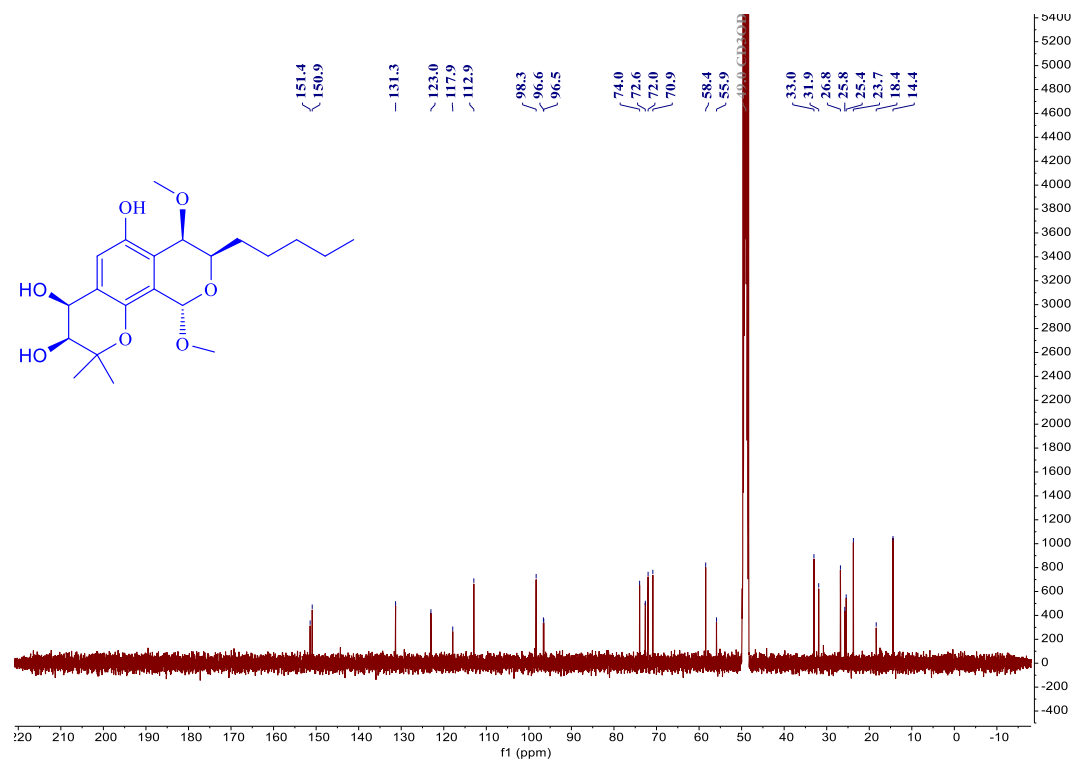

Figure S62. <sup>13</sup>C NMR spectrum of 6 in CD<sub>3</sub>OD.

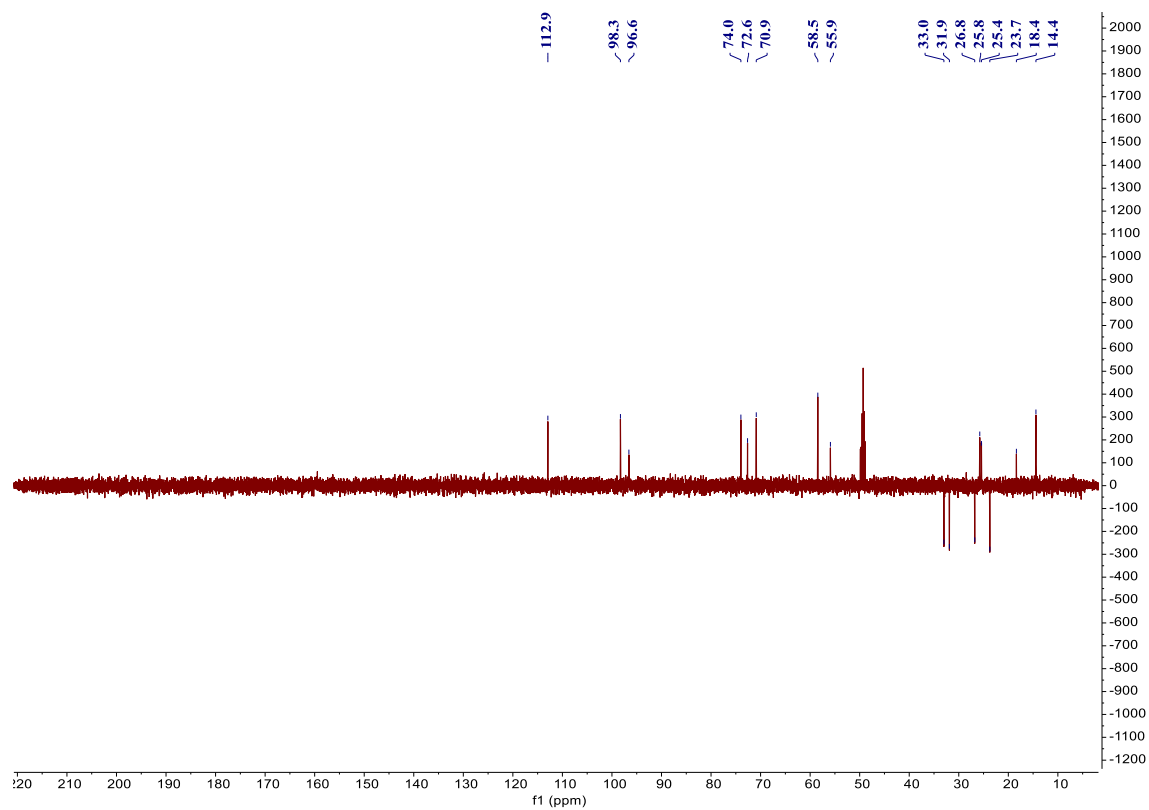

**Figure S63.** DEPT 135 spectrum of **6** in CD<sub>3</sub>OD.

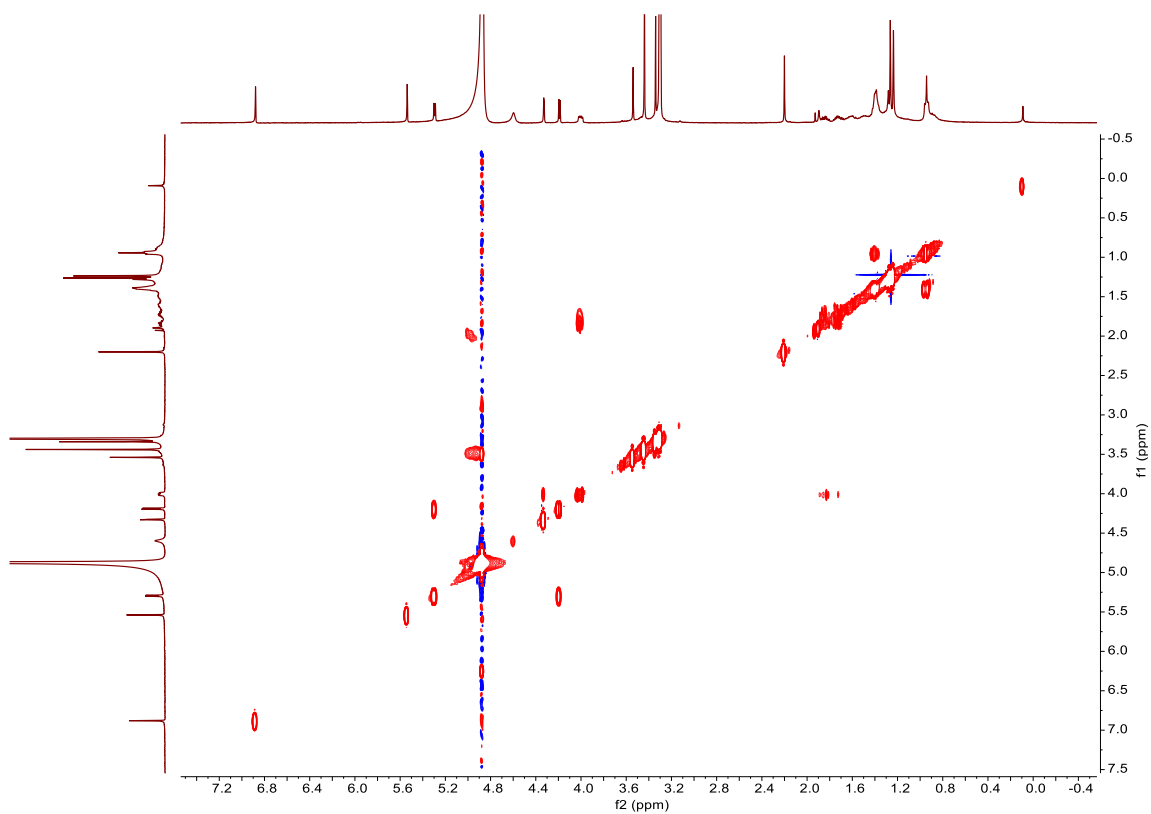

**Figure S64.** <sup>1</sup>H—<sup>1</sup>H COSY spectrum of **6** in CD<sub>3</sub>OD.

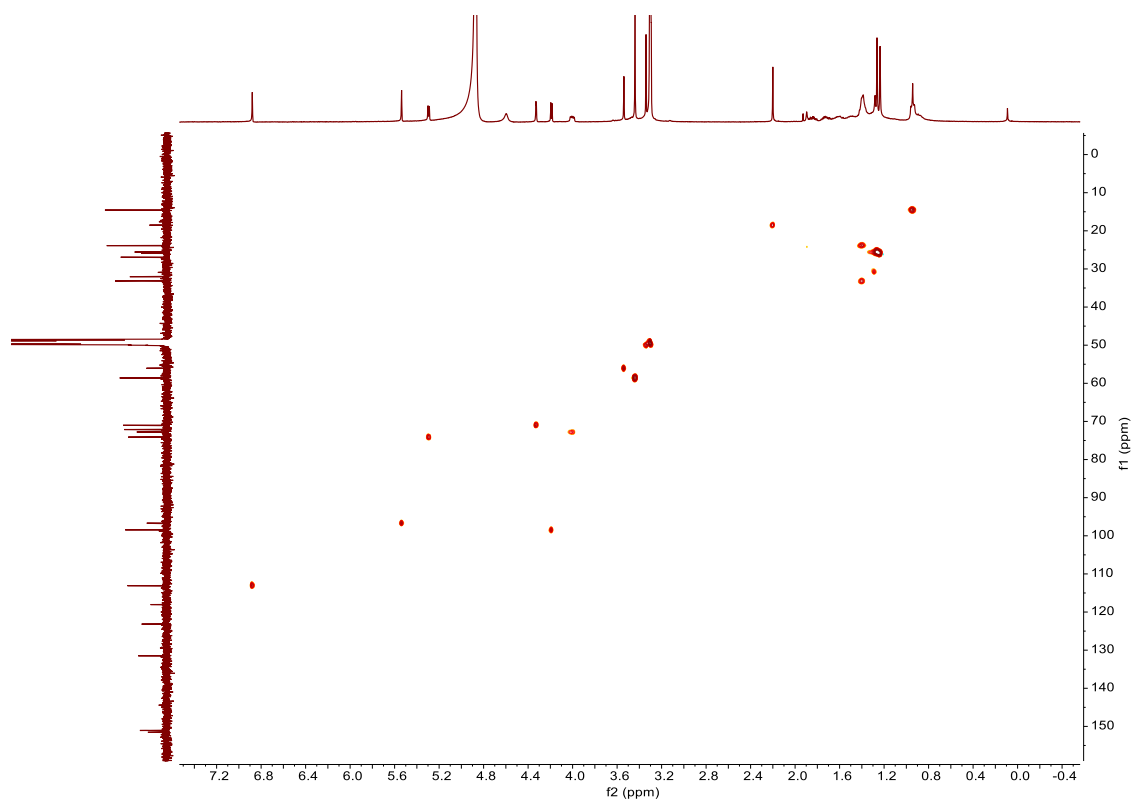

**Figure S65.** HSQC spectrum of **6** in CD<sub>3</sub>OD.

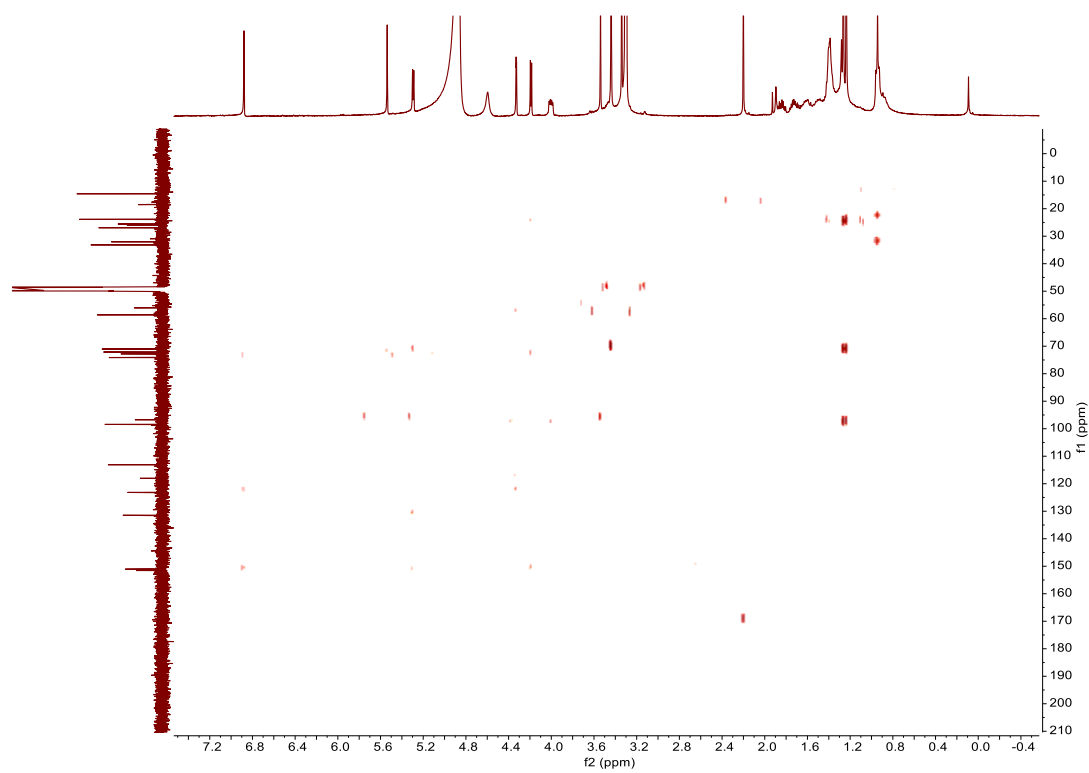

**Figure S66.** HMBC spectrum of **6** in CD<sub>3</sub>OD.

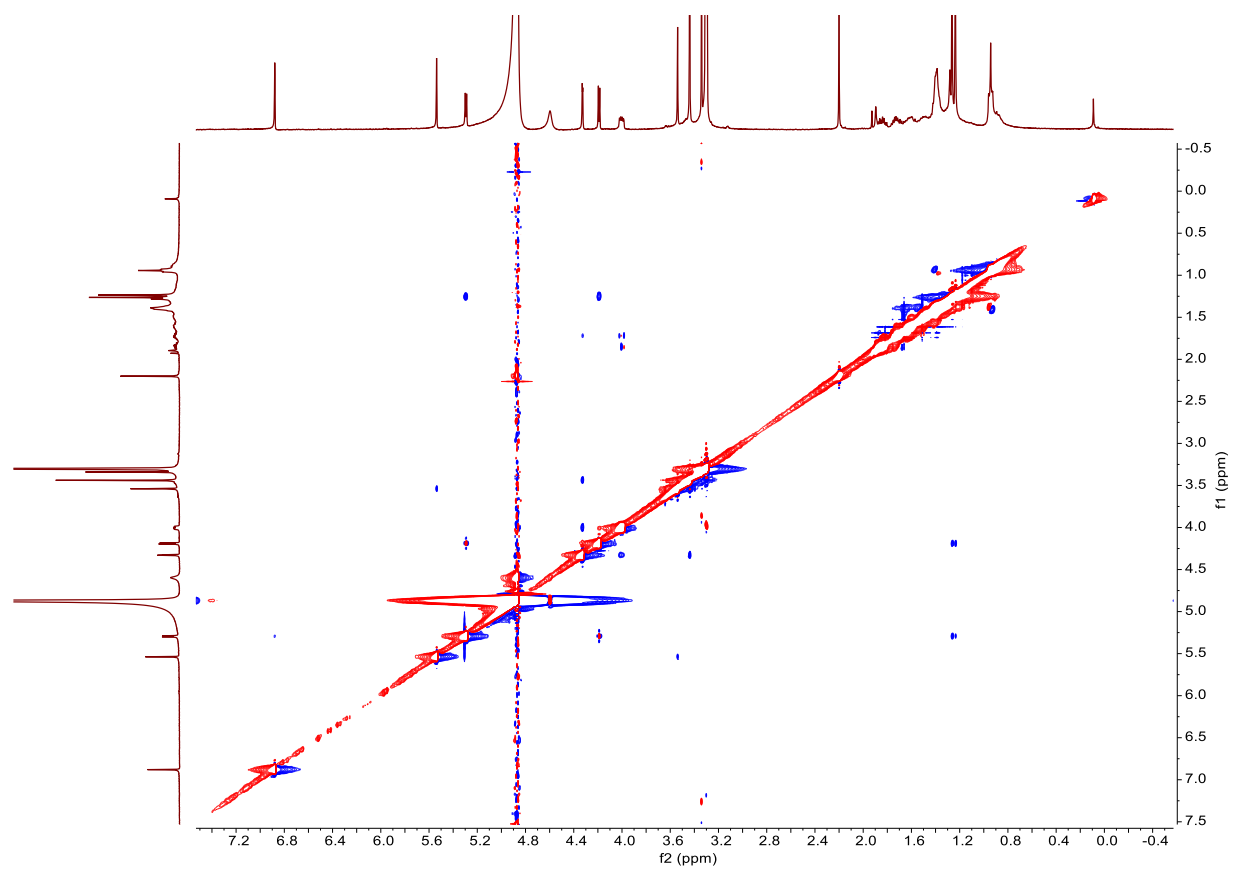

**Figure S67.** NOESY spectrum of **6** in CD<sub>3</sub>OD.
